# Supplementary material for: Synthesis of benzofused 1,4-azaborinols via [4 + 2] annulation strategy and its application in indole synthesis
Source: Royal Society of Chemistry journal article supplement (doi:10.1039/c5ra05082k), 2015-01-01

MUR\_1042\_029RP, dmso

| OriginalDateForRelativeTime |                      | 2014-02-14T16:19:20 |                                                                     | Multiplets Integrals Sum |         | 11.80                |           | Number of Nuclei     |  | 12 H's |  |
|-----------------------------|----------------------|---------------------|---------------------------------------------------------------------|--------------------------|---------|----------------------|-----------|----------------------|--|--------|--|
| Acquisition Time (sec)      | 5.3084               | Comment             | MUR_1042_029RP, dmso                                                |                          |         | Date                 |           | 14 Feb 2014 16:19:20 |  |        |  |
| Date Stamp                  | 14 Feb 2014 16:19:20 | File Name           | \\inbglab176164\ecm_2014\MUR\data\MED\mm\MUR_1042_029RP\1\data\1\1r |                          |         |                      |           |                      |  |        |  |
| Frequency (MHz)             | 300.13               | Nucleus             | 1H                                                                  | Number of Transients     | 128     | Origin               | av300     |                      |  |        |  |
| Original Points Count       | 32768                | Owner               | administrator                                                       | Points Count             | 32768   | Pulse Sequence       | zg30      |                      |  |        |  |
| Receiver Gain               | 1625.50              | SW(cyclical) (Hz)   | 6172.84                                                             | Solvent                  | DMSO-d6 | Spectrum Offset (Hz) | 1853.2377 |                      |  |        |  |
| Spectrum Type               | STANDARD             | Sweep Width (Hz)    | 6172.65                                                             | Temperature (degree C)   | 25.000  |                      |           |                      |  |        |  |

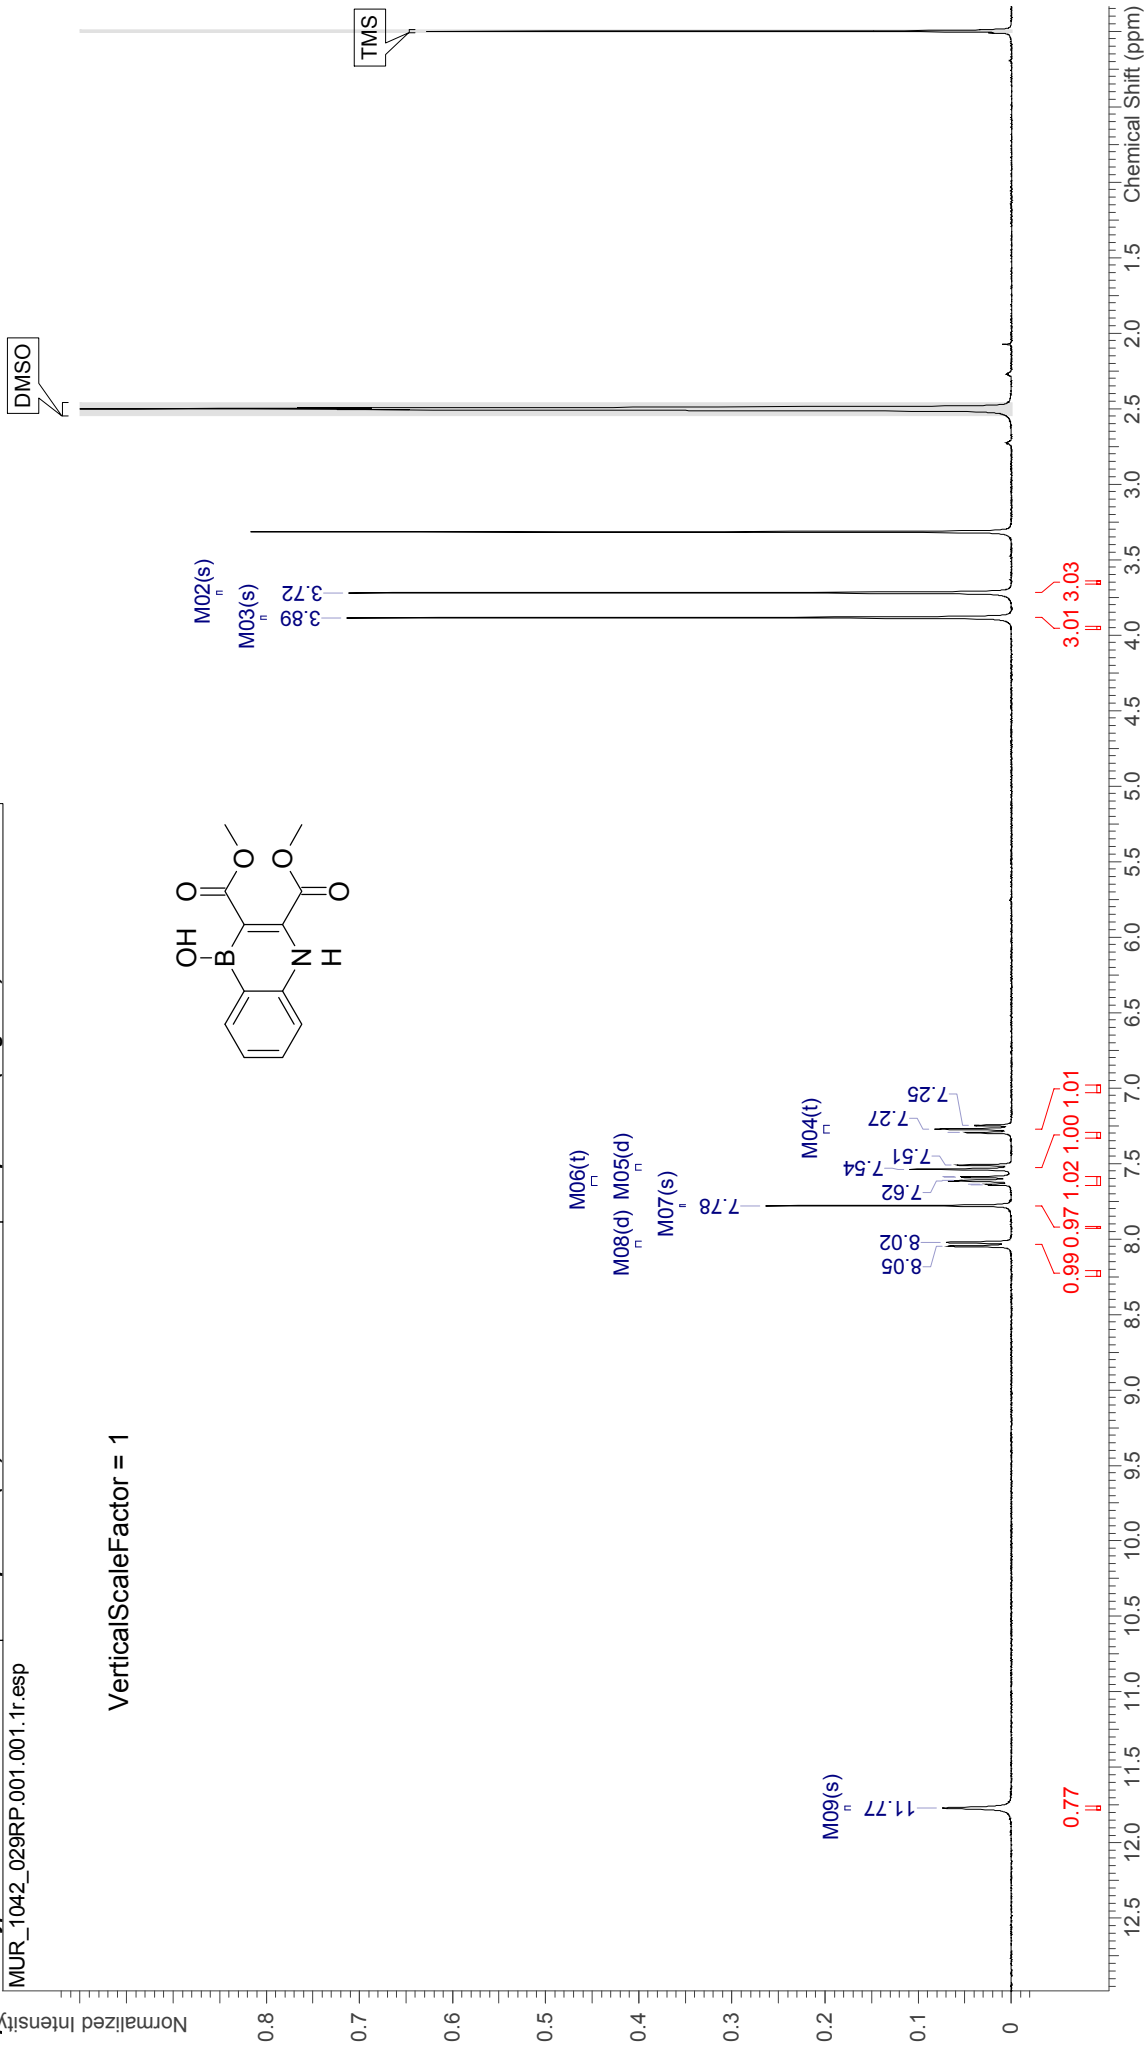

|                             |                      |                          |                                                    |                        |                      |
|-----------------------------|----------------------|--------------------------|----------------------------------------------------|------------------------|----------------------|
| OriginalDateForRelativeTime | 2014-02-15T09:31:52  | Multiplets Integrals Sum | 0.00                                               | Number of Nuclei       | 0 C's                |
| Acquisition Time (sec)      | 1.0912               | Comment                  | C13CPD DMSO (F:\chem\DATA\2014-02\ biomnt 1        | Date                   | 15 Feb 2014 09:31:52 |
| Date Stamp                  | 15 Feb 2014 09:31:52 | File Name                | F:\PHD DATA\C13\24052014\MUR-1042-029\11P\DATA\11r | Origin                 | spect                |
| Frequency (MHz)             | 125.77               | Nucleus                  | <sup>13</sup> C                                    | Pulse Sequence         | zgpg30               |
| Original Points Count       | 32768                | Owner                    | administrator                                      | Spectrum Offset (Hz)   | 12517.4756           |
| Receiver Gain               | 32768.00             | SW(Cyclical) (Hz)        | 30030.03                                           | Solvent                | DMSO-d6              |
| Spectrum Type               | STANDARD             | Sweep Width (Hz)         | 30029.11                                           | Temperature (degree C) | 25.000               |

MUR-1042-029 001.001.1r<sup>eq</sup>VerticalScaleFactor = 1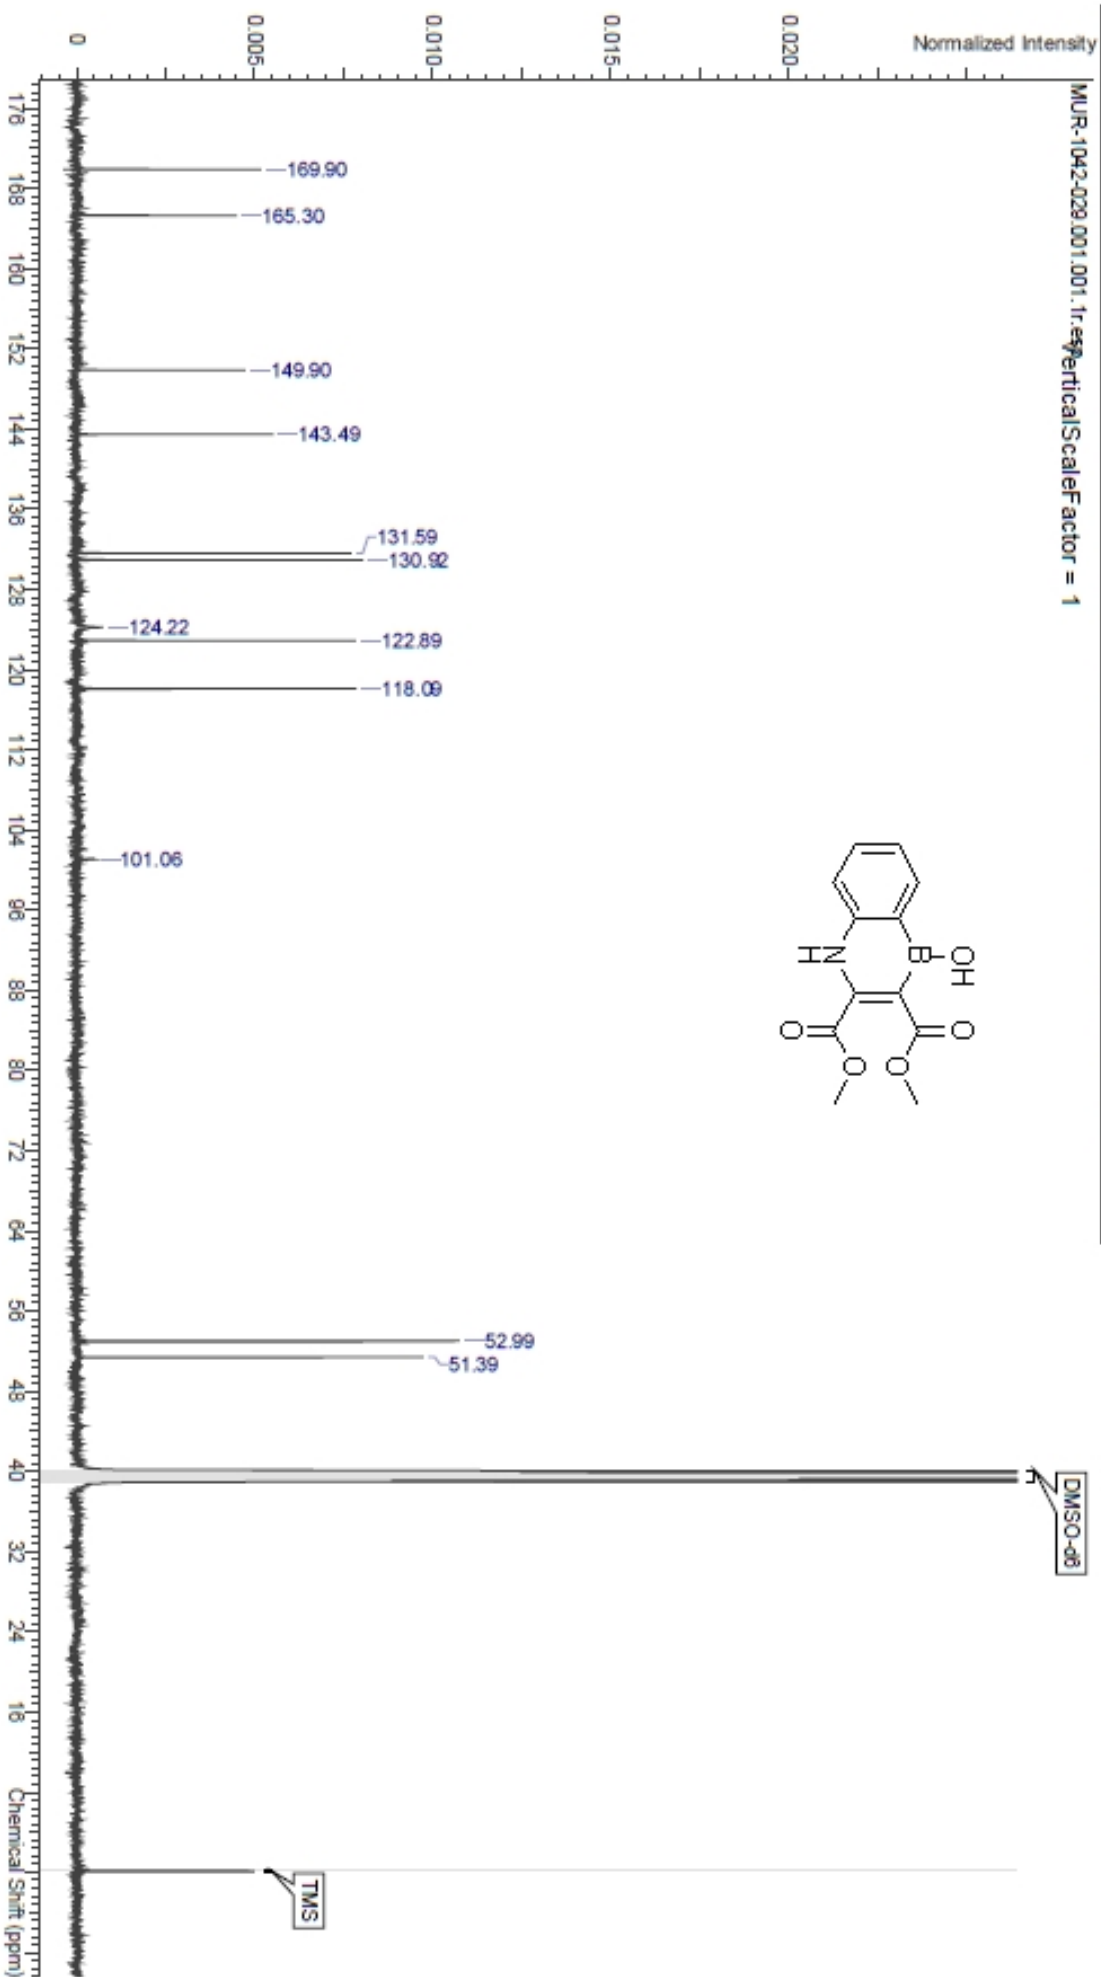

|                                                 |                      |                               |                                                                      |                        |                      |
|-------------------------------------------------|----------------------|-------------------------------|----------------------------------------------------------------------|------------------------|----------------------|
| Original Date/Relative Time 2014-03-21T16:47:04 |                      | Multiplets Integrals Sum 0.00 |                                                                      | Number of Nuclei 0 B's |                      |
| Acquisition Time (sec)                          | 1.7007               | Comment                       | MUR_1042-0298B                                                       | Date                   | 21 Mar 2014 16:47:04 |
| Date Stamp                                      | 21 Mar 2014 16:47:04 | File Name                     | Winbglab1761641eem_2014\MUR\data\1MED\omn\MUR_1042_0298B\1podata\11r | Origin                 | av300                |
| Frequency (MHz)                                 | 86.29                | Nucleus                       | 11B                                                                  | Number of Transients   | 1024                 |
| Original Points Count                           | 32768                | Owner                         | administrator                                                        | Points Count           | 32768                |
| Receiver Gain                                   | 2896.30              | SW(cyclical) (Hz)             | 18267.82                                                             | Pulse Sequence         | zg                   |
| Spectrum Type                                   | STANDARD             | Sweep Width (Hz)              | 18267.23                                                             | Solvent                | DMSO-d6              |
|                                                 |                      | Temperature (degree C)        | 25.000                                                               | Spectrum Offset (Hz)   | 0.1709               |

MUR\_1042\_0298B.001.001.1r.apf:VerticalScaleFactor = 1

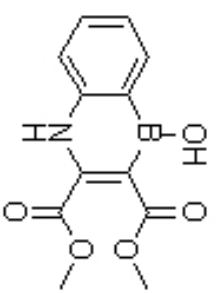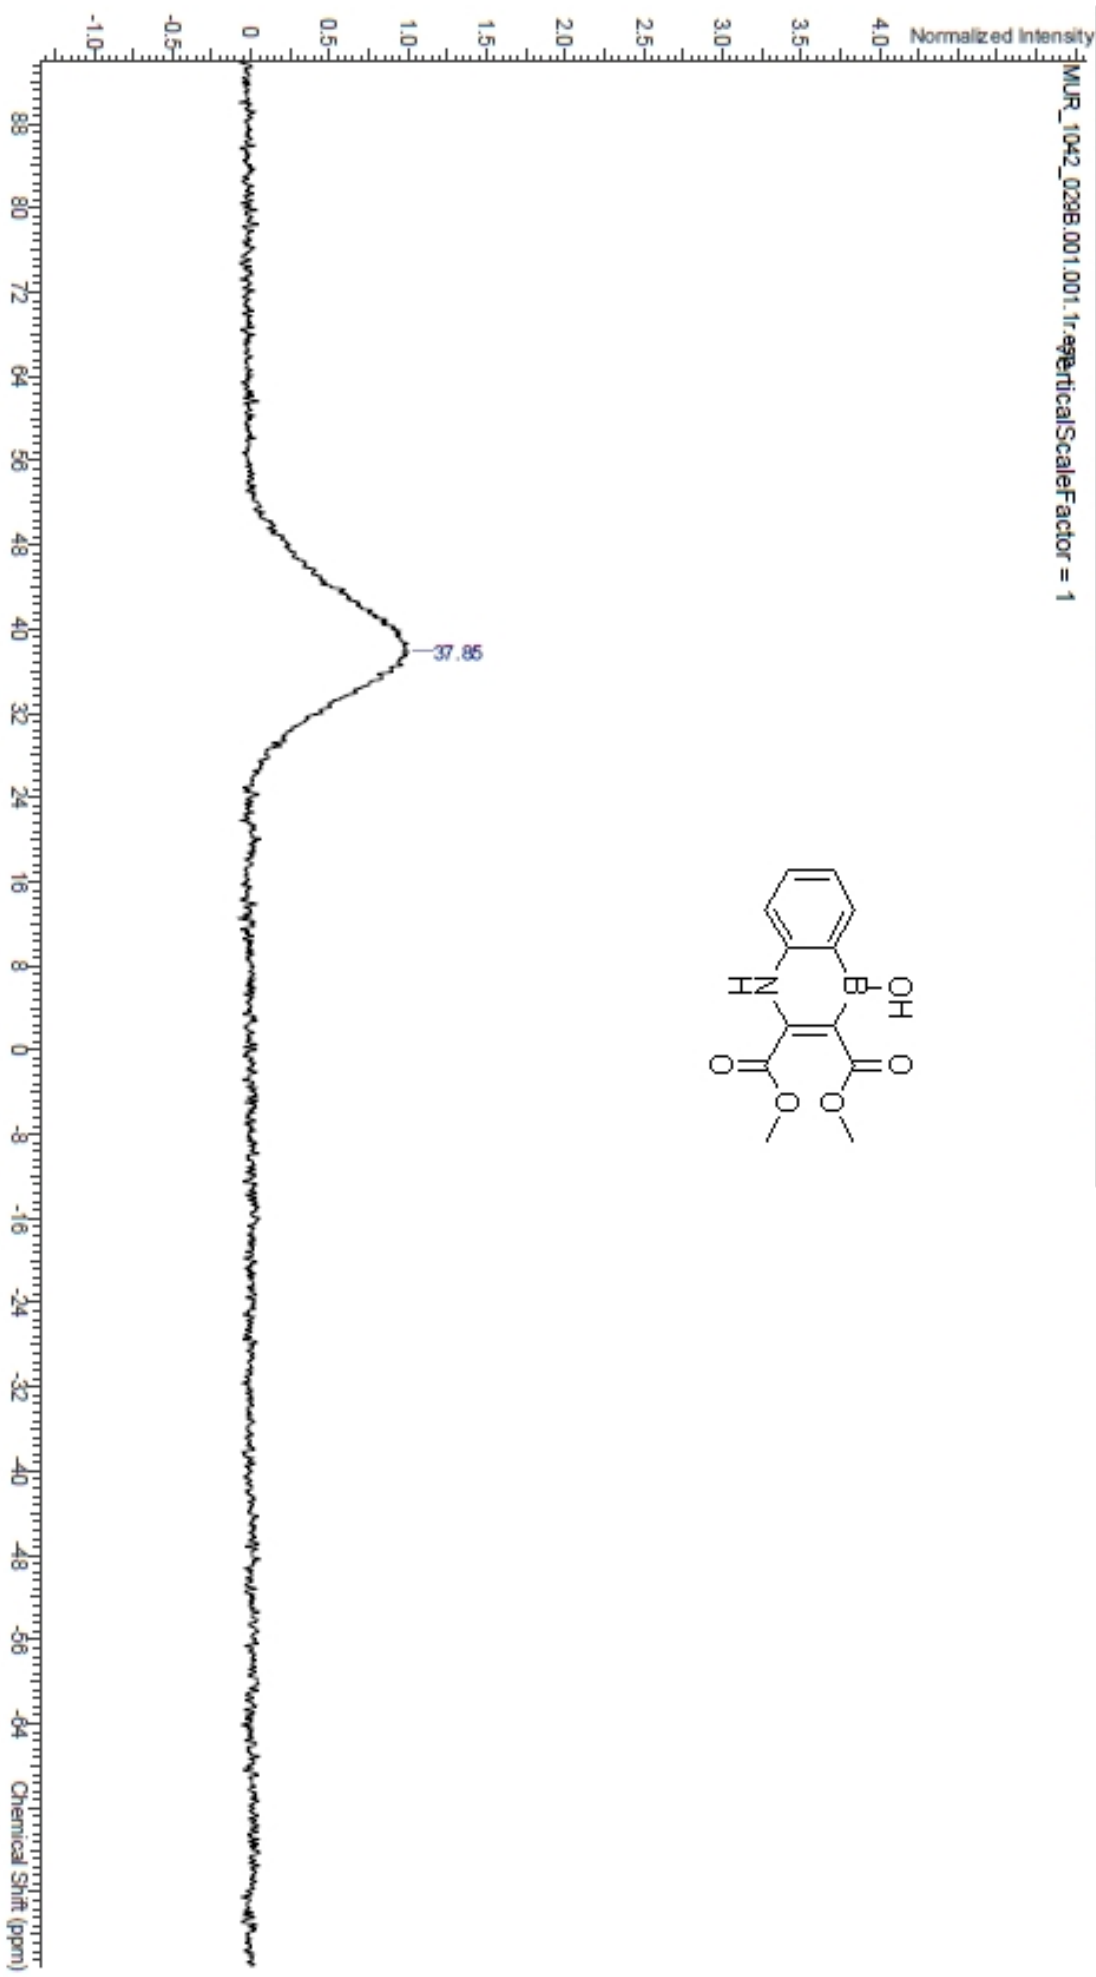

| OriginalDateForRelativeTime |                      | 2014-03-26T13:32:56 |               | Multiplets Integrals Sum |                                                                      | 16.15                |                      | Number of Nuclei |  | 16 H's |  |
|-----------------------------|----------------------|---------------------|---------------|--------------------------|----------------------------------------------------------------------|----------------------|----------------------|------------------|--|--------|--|
| Acquisition Time (sec)      | 5.3084               | Comment             | MUR_1042_085S | File Name                | \\inbglab176164\ecm_2014\MUR\data\1MED\inmr\MUR_1042_085S11\data111r | Date                 | 26 Mar 2014 13:32:56 |                  |  |        |  |
| Date Stamp                  | 26 Mar 2014 13:32:56 | Nucleus             | 1H            | Number of Transients     | 32                                                                   | Origin               | av300                |                  |  |        |  |
| Frequency (MHz)             | 300.13               | Owner               | administrator | Points Count             | 32768                                                                | Pulse Sequence       | zg30                 |                  |  |        |  |
| Original Points Count       | 32768                | SW(cyclical) (Hz)   | 6172.84       | Solvent                  | DMSO-d6                                                              | Spectrum Offset (Hz) | 1853.5405            |                  |  |        |  |
| Receiver Gain               | 1625.50              | Sweep Width (Hz)    | 6172.65       | Temperature (degree C)   | 25.000                                                               |                      |                      |                  |  |        |  |
| Spectrum Type               | STANDARD             |                     |               |                          |                                                                      |                      |                      |                  |  |        |  |

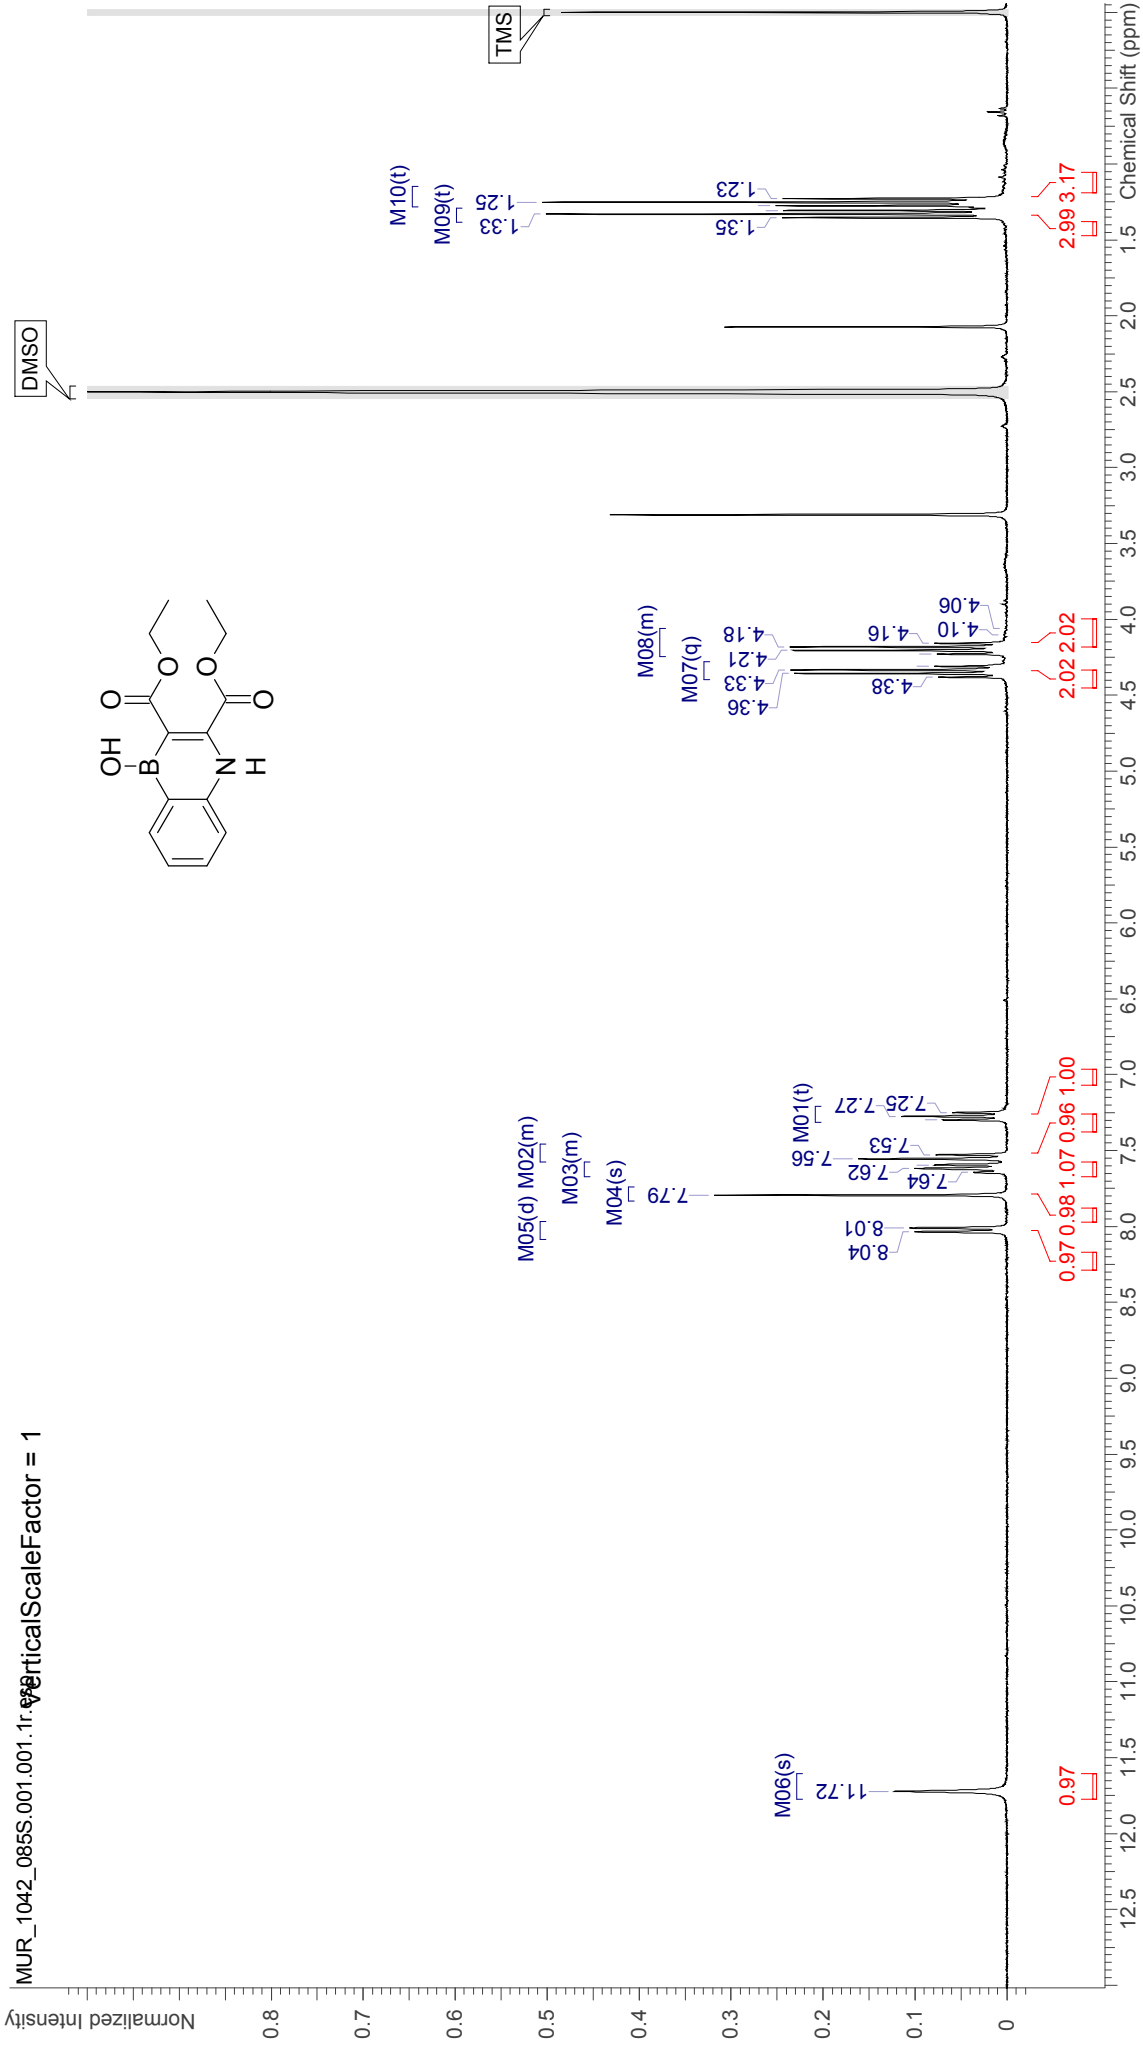

MUR\_1042\_085S.001.001.1r VerticalScaleFactor = 1

| OriginalDateForRelativeTime | 2014-03-31T05:15:52  | Multiplets Integrals Sum                                | 0.00                                                              | Number of Nuclei     | 0 C's                |
|-----------------------------|----------------------|---------------------------------------------------------|-------------------------------------------------------------------|----------------------|----------------------|
| Acquisition Time (sec)      | 1.0912               | mur_1042_85 C-13CPD DMSO (F:\ecm\DATA\2013-11} bionmr 6 |                                                                   | Date                 | 31 Mar 2014 05:15:52 |
| Date Stamp                  | 31 Mar 2014 05:15:52 | File Name                                               | C:\Users\kvjk299\Desktop\C13\recent c13\MUR_1042_085F\1\data\1\1r |                      |                      |
| Frequency (MHz)             | 125.77               | Nucleus                                                 | 13C                                                               | Origin               | spect                |
| Original Points Count       | 32768                | Owner                                                   | administrator                                                     | Points Count         | 32768                |
| Receiver Gain               | 32768.00             | SW(cyclical) (Hz)                                       | 30030.03                                                          | Pulse Sequence       | zpgq30               |
| Spectrum Type               | STANDARD             | Sweep Width (Hz)                                        | 30029.11                                                          | Spectrum Offset (Hz) | 12650.4160           |
|                             |                      | Temperature (degree C)                                  | 25.000                                                            |                      |                      |

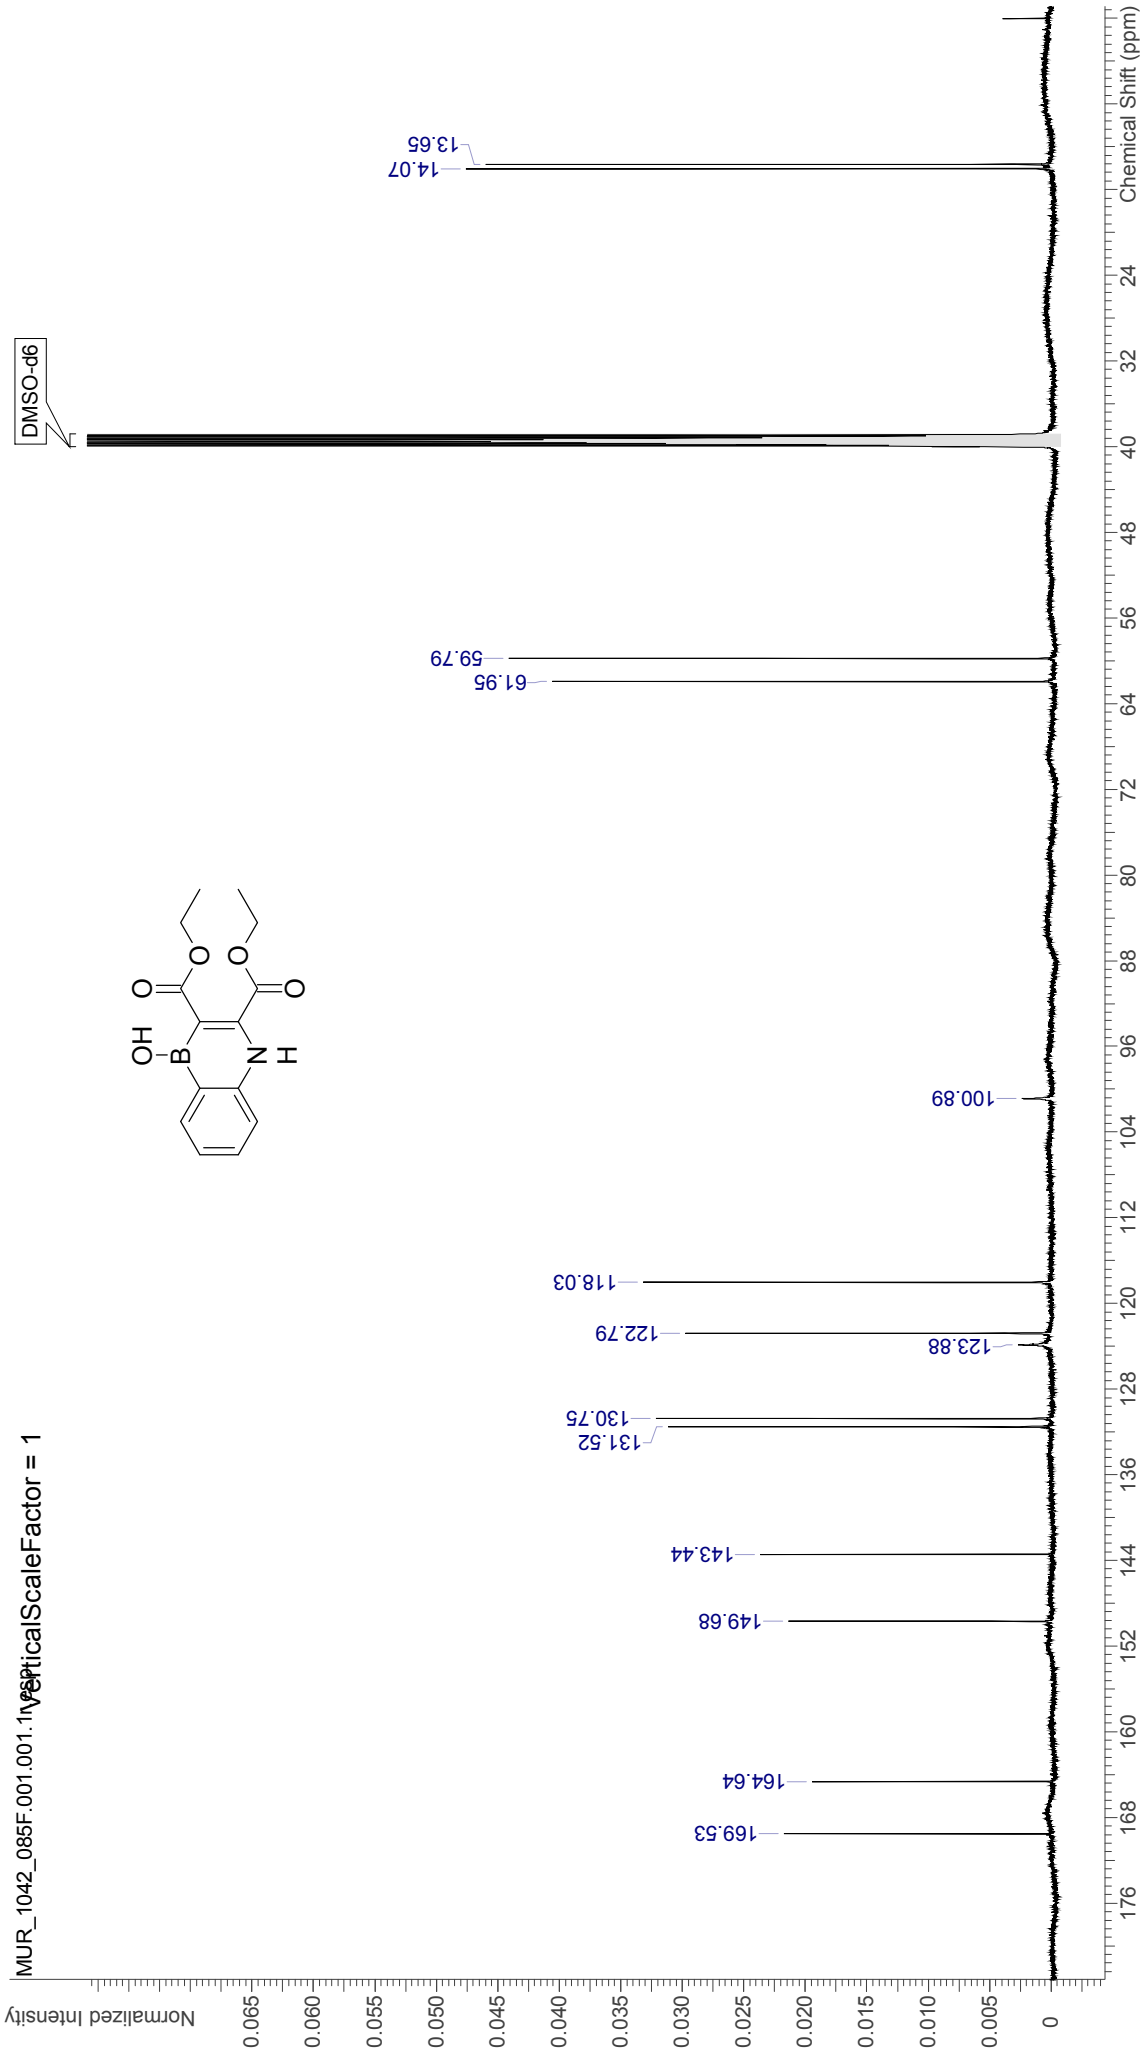

| OriginalDateForRelativeTime |                      | 2014-04-18T15:38:48  |                                                               | Multiplets Integrals Sum |                      | 0.00             |          | Number of Nuclei       |          | 1 B's |  |
|-----------------------------|----------------------|----------------------|---------------------------------------------------------------|--------------------------|----------------------|------------------|----------|------------------------|----------|-------|--|
| Acquisition Time (sec)      | 1.7007               | Comment              | MUR_1042_085B                                                 | Date                     | 18 Apr 2014 15:38:48 |                  |          |                        |          |       |  |
| Date Stamp                  | 18 Apr 2014 15:38:48 | File Name            | \\inbglab176164\ecm_2014\MUR\data\IMED\nmr\MUR_1042_085B\1fid |                          |                      |                  |          |                        |          |       |  |
| Frequency (MHz)             | 96.29                | Nucleus              | 11B                                                           | Number of Transients     | 3000                 | Origin           | av300    | Original Points Count  | 32768    |       |  |
| Owner                       | administrator        | Points Count         | 32768                                                         | Pulse Sequence           | zg                   | Receiver Gain    | 3251.00  | SW(cyclical) (Hz)      | 19267.82 |       |  |
| Solvent                     | DMSO-d6              | Spectrum Offset (Hz) | 0.1662                                                        | Spectrum Type            | STANDARD             | Sweep Width (Hz) | 19267.23 | Temperature (degree C) | 25.000   |       |  |

MUR\_1042\_085B.001.esp

VerticalScaleFactor = 1

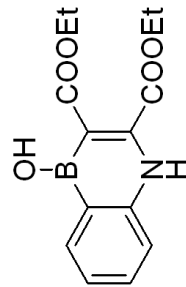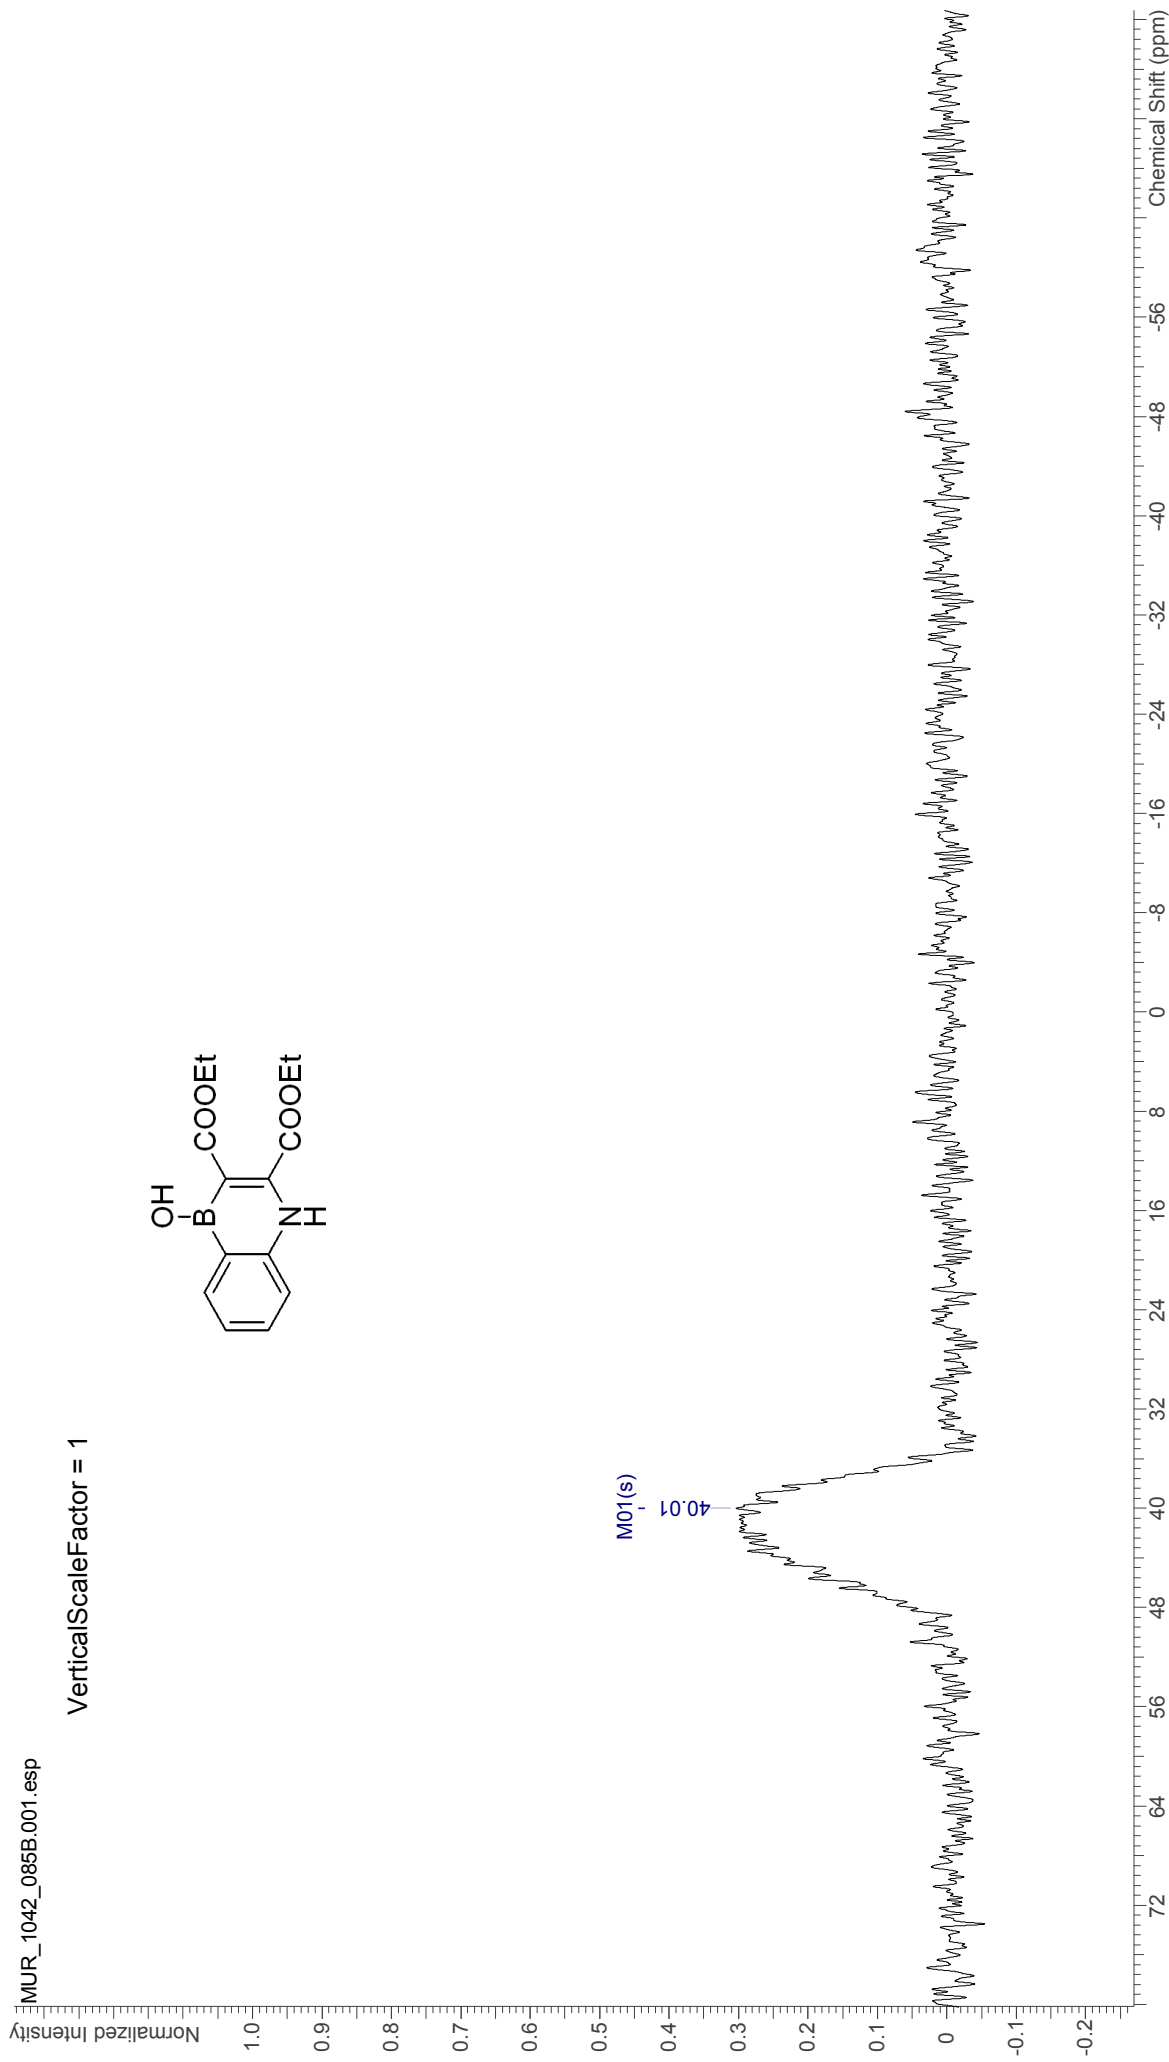

|                                                        |                                                                                        |                                       |  |                                |  |
|--------------------------------------------------------|----------------------------------------------------------------------------------------|---------------------------------------|--|--------------------------------|--|
| <b>OriginalDateForRelativeTime</b> 2014-04-11T11:37:44 |                                                                                        | <b>Multiplets Integrals Sum</b> 14.11 |  | <b>Number of Nuclei</b> 14 H's |  |
| <b>Acquisition Time (sec)</b> 5.3084                   | <b>Comment</b> MUR_1042_037_01                                                         | <b>Date</b> 11 Apr 2014 11:37:44      |  |                                |  |
| <b>Date Stamp</b> 11 Apr 2014 11:37:44                 | <b>File Name</b> \\inbglab176164\ecm_2014\MUR\data\1MED\nmr\MUR_1042_037_01\1\data\11r | <b>Origin</b> av300                   |  |                                |  |
| <b>Frequency (MHz)</b> 300.13                          | <b>Nucleus</b> 1H                                                                      | <b>Pulse Sequence</b> zg30            |  |                                |  |
| <b>Original Points Count</b> 32768                     | <b>Owner</b> administrator                                                             | <b>Spectrum Offset (Hz)</b> 1853.5765 |  |                                |  |
| <b>Receiver Gain</b> 1625.50                           | <b>SW(cyclical) (Hz)</b> 6172.84                                                       | <b>Solvent</b> DMSO-d6                |  |                                |  |
| <b>Spectrum Type</b> STANDARD                          | <b>Sweep Width (Hz)</b> 6172.65                                                        | <b>Temperature (degree C)</b> 25.000  |  |                                |  |

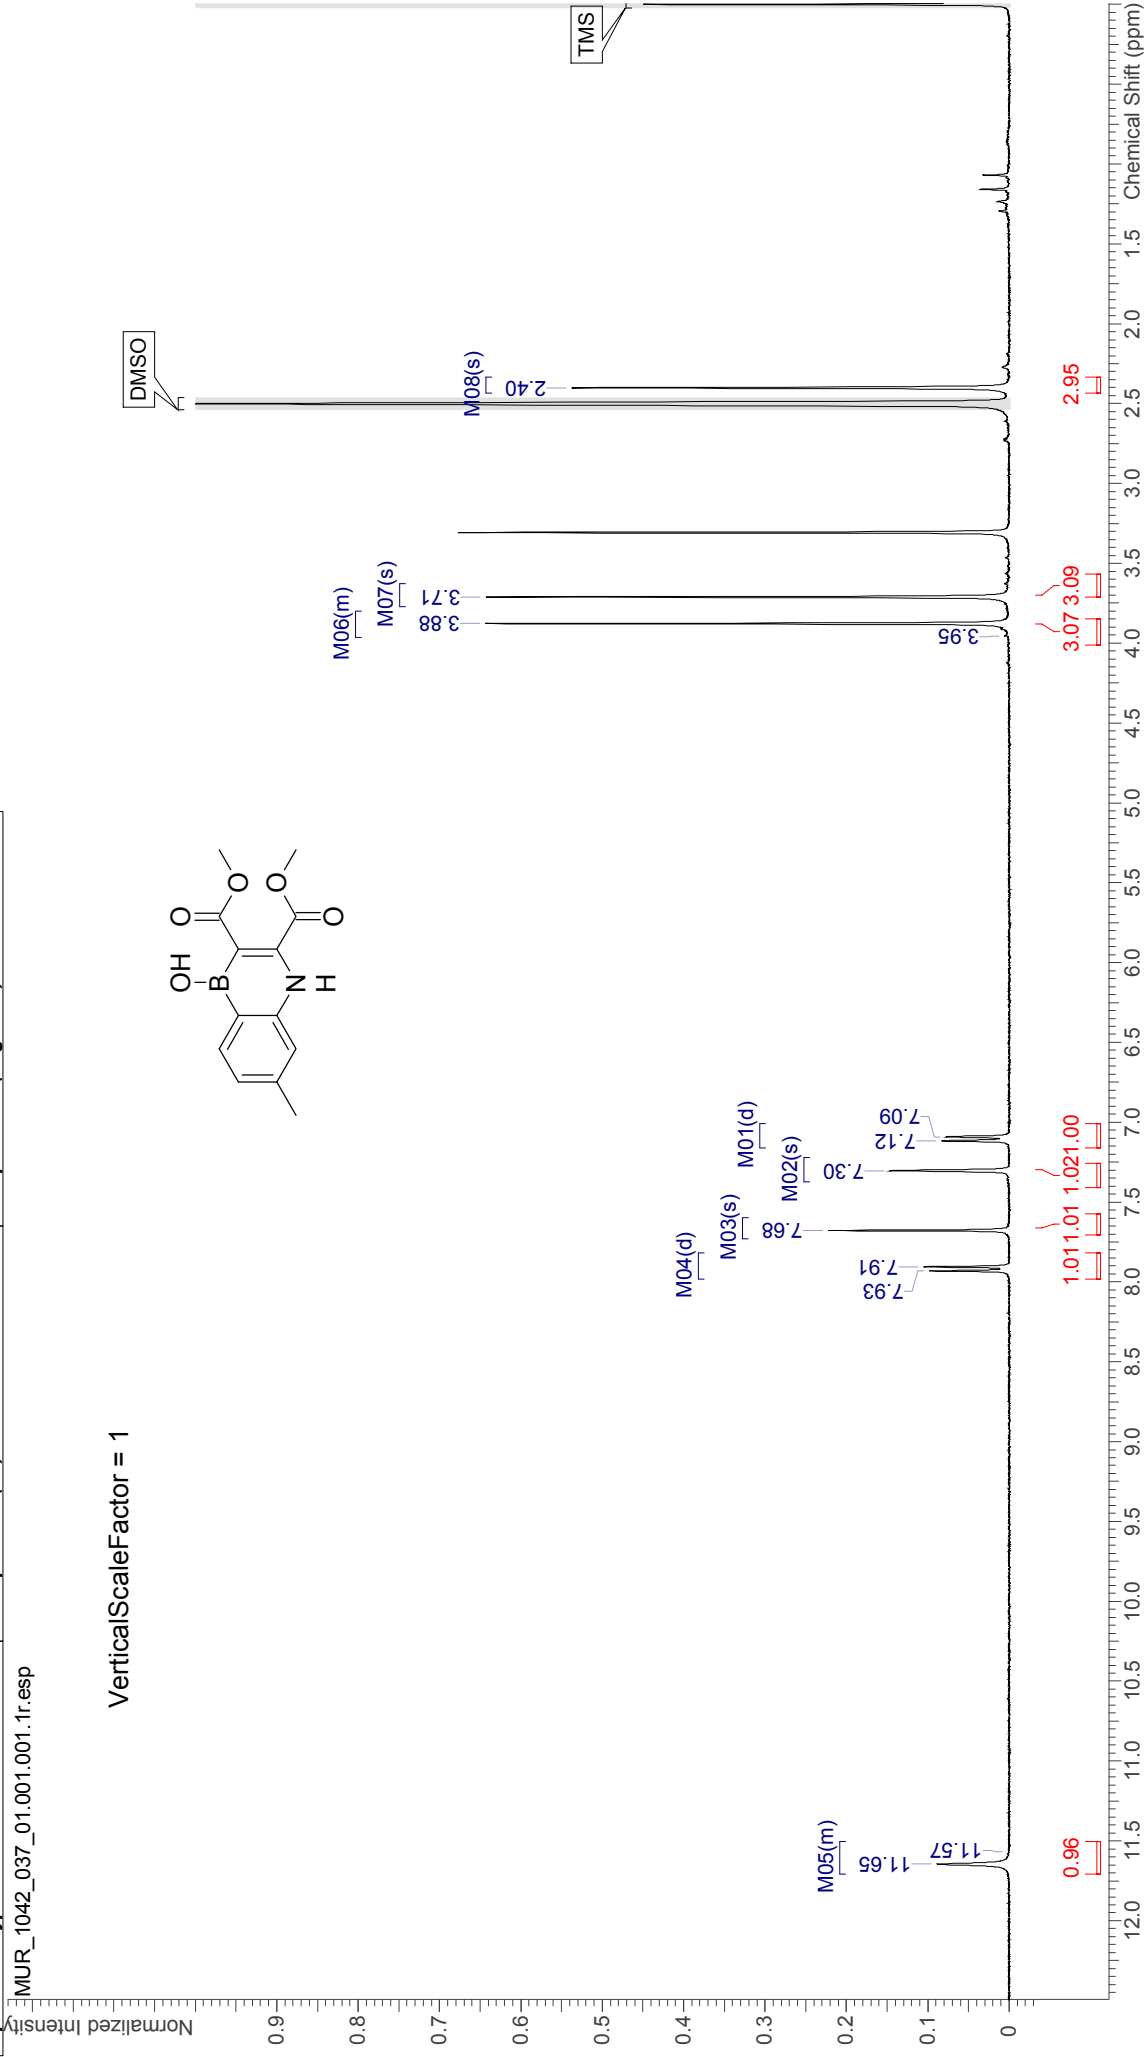

| OriginalDateForRelativeTime | 2014-02-16T20:58:48  | Multiplets Integrals Sum                    | 0.00                                              | Number of Nuclei       | 0 C's                |
|-----------------------------|----------------------|---------------------------------------------|---------------------------------------------------|------------------------|----------------------|
| Acquisition Time (sec)      | 1.0912               | C-13CPD DMSO (F:\ecm\DATA\2014-02} bionmr 4 |                                                   | Date                   | 16 Feb 2014 20:58:48 |
| Date Stamp                  | 16 Feb 2014 20:58:48 | File Name                                   | C:\Users\kyjk299\Desktop\C13MUR-1042-371\data\11r |                        |                      |
| Frequency (MHz)             | 125.77               | Nucleus                                     | 13C                                               | Origin                 | spect                |
| Original Points Count       | 32768                | Owner                                       | administrator                                     | Pulse Sequence         | zpg30                |
| Receiver Gain               | 32768.00             | SW(cyclical) (Hz)                           | 30030.03                                          | Spectrum Offset (Hz)   | 12505.6152           |
| Spectrum Type               | STANDARD             | Sweep Width (Hz)                            | 30029.11                                          | Temperature (degree C) | 25.000               |

MUR-1042-37.001.001.1r.es\verticalScaleFactor = 1

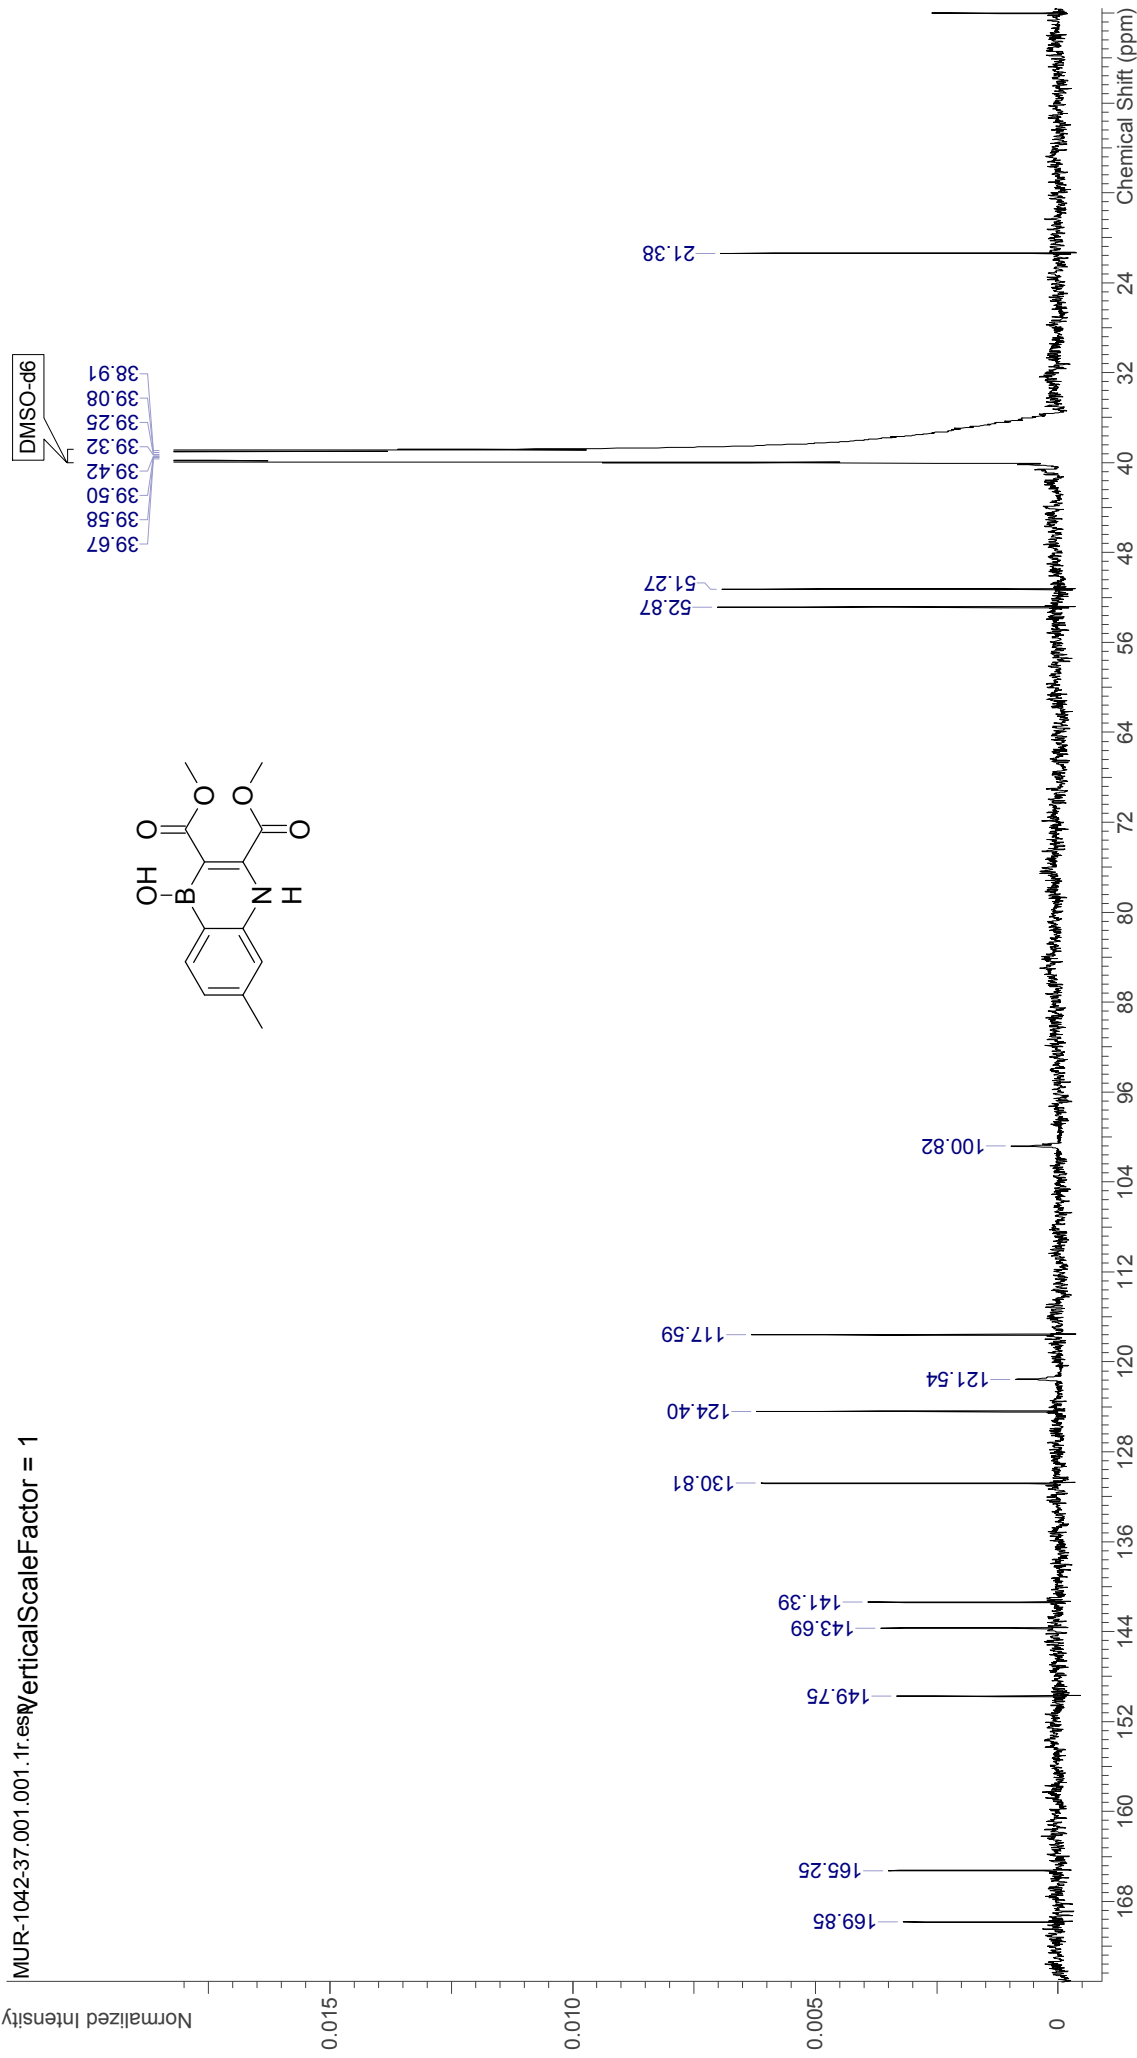



| OriginalDateForRelativeTime |                      | 2014-04-18T18:33:44  |                                                               | Multiplets Integrals Sum |                      | 0.00             |          | Number of Nuclei       |          | 3 B's |  |
|-----------------------------|----------------------|----------------------|---------------------------------------------------------------|--------------------------|----------------------|------------------|----------|------------------------|----------|-------|--|
| Acquisition Time (sec)      | 1.7007               | Comment              | MUR_1042_037B                                                 | Date                     | 18 Apr 2014 18:33:44 |                  |          |                        |          |       |  |
| Date Stamp                  | 18 Apr 2014 18:33:44 | File Name            | \\inbglab176164\ecm_2014\MUR\data\IMED\nmr\MUR_1042_037B\1fid |                          |                      |                  |          |                        |          |       |  |
| Frequency (MHz)             | 96.29                | Nucleus              | 11B                                                           | Number of Transients     | 3000                 | Origin           | av300    | Original Points Count  | 32768    |       |  |
| Owner                       | administrator        | Points Count         | 32768                                                         | Pulse Sequence           | zg                   | Receiver Gain    | 3251.00  | SW(cyclical) (Hz)      | 19267.82 |       |  |
| Solvent                     | DMSO-d6              | Spectrum Offset (Hz) | 0.1662                                                        | Spectrum Type            | STANDARD             | Sweep Width (Hz) | 19267.23 | Temperature (degree C) | 25.000   |       |  |

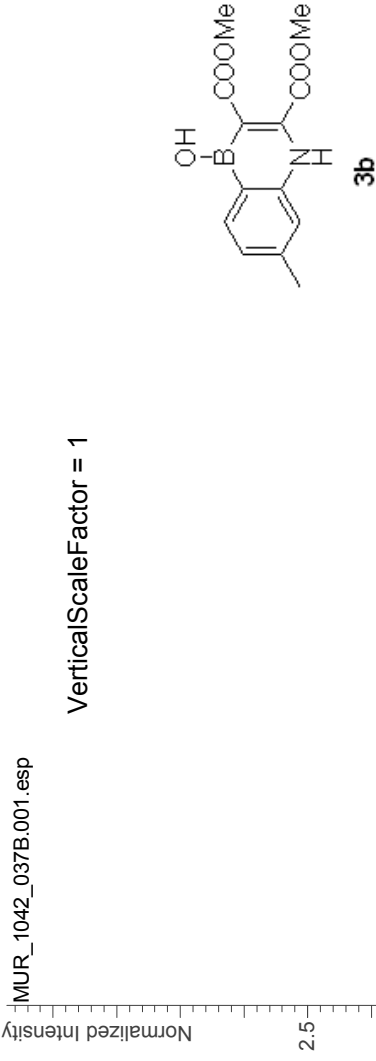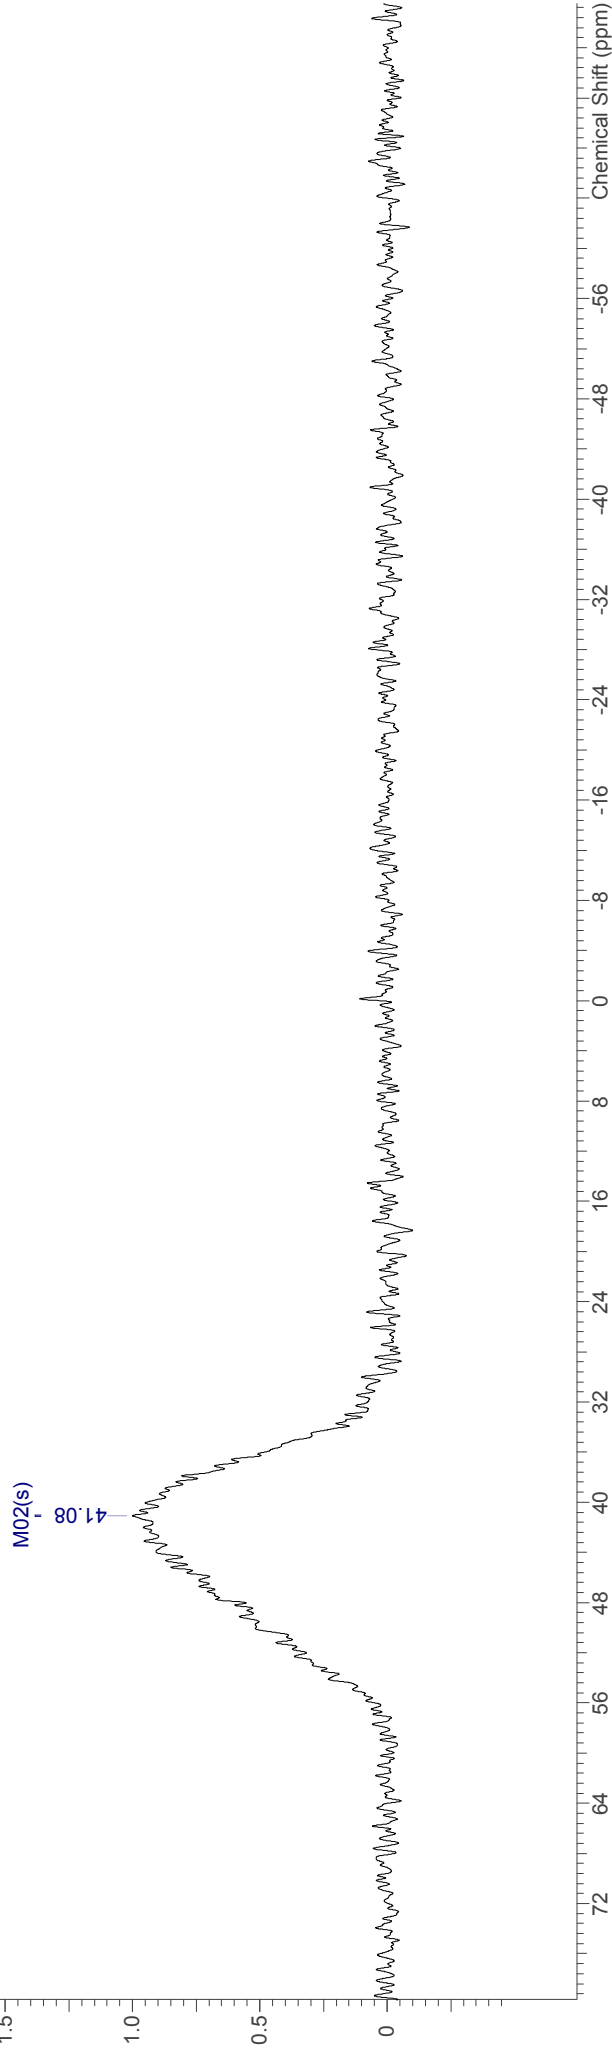

|                                                        |                                                                                        |                                       |                                      |                                       |  |
|--------------------------------------------------------|----------------------------------------------------------------------------------------|---------------------------------------|--------------------------------------|---------------------------------------|--|
| <b>OriginalDateForRelativeTime</b> 2014-04-11T11:12:08 |                                                                                        | <b>Multiplets Integrals Sum</b> 25.75 |                                      | <b>Number of Nuclei</b> 38 H's        |  |
| <b>Acquisition Time (sec)</b> 5.3084                   | <b>Comment</b> MUR_1042_037_02                                                         | <b>Date</b> 11 Apr 2014 11:12:08      |                                      |                                       |  |
| <b>Date Stamp</b> 11 Apr 2014 11:12:08                 | <b>File Name</b> \\inbglab176164\ecm_2014\MUR\data\1MED\nmr\MUR_1042_037_02\1pdata\11r | <b>Origin</b> av300                   |                                      |                                       |  |
| <b>Frequency (MHz)</b> 300.13                          | <b>Nucleus</b> 1H                                                                      | <b>Number of Transients</b> 32        | <b>Pulse Sequence</b> zg30           |                                       |  |
| <b>Original Points Count</b> 32768                     | <b>Owner</b> administrator                                                             | <b>Points Count</b> 32768             | <b>Solvent</b> DMSO-d6               | <b>Spectrum Offset (Hz)</b> 1853.6790 |  |
| <b>Receiver Gain</b> 1625.50                           | <b>SW(cyclical) (Hz)</b> 6172.84                                                       | <b>Solvent</b> DMSO-d6                | <b>Temperature (degree C)</b> 25.000 |                                       |  |
| <b>Spectrum Type</b> STANDARD                          | <b>Sweep Width (Hz)</b> 6172.65                                                        |                                       |                                      |                                       |  |

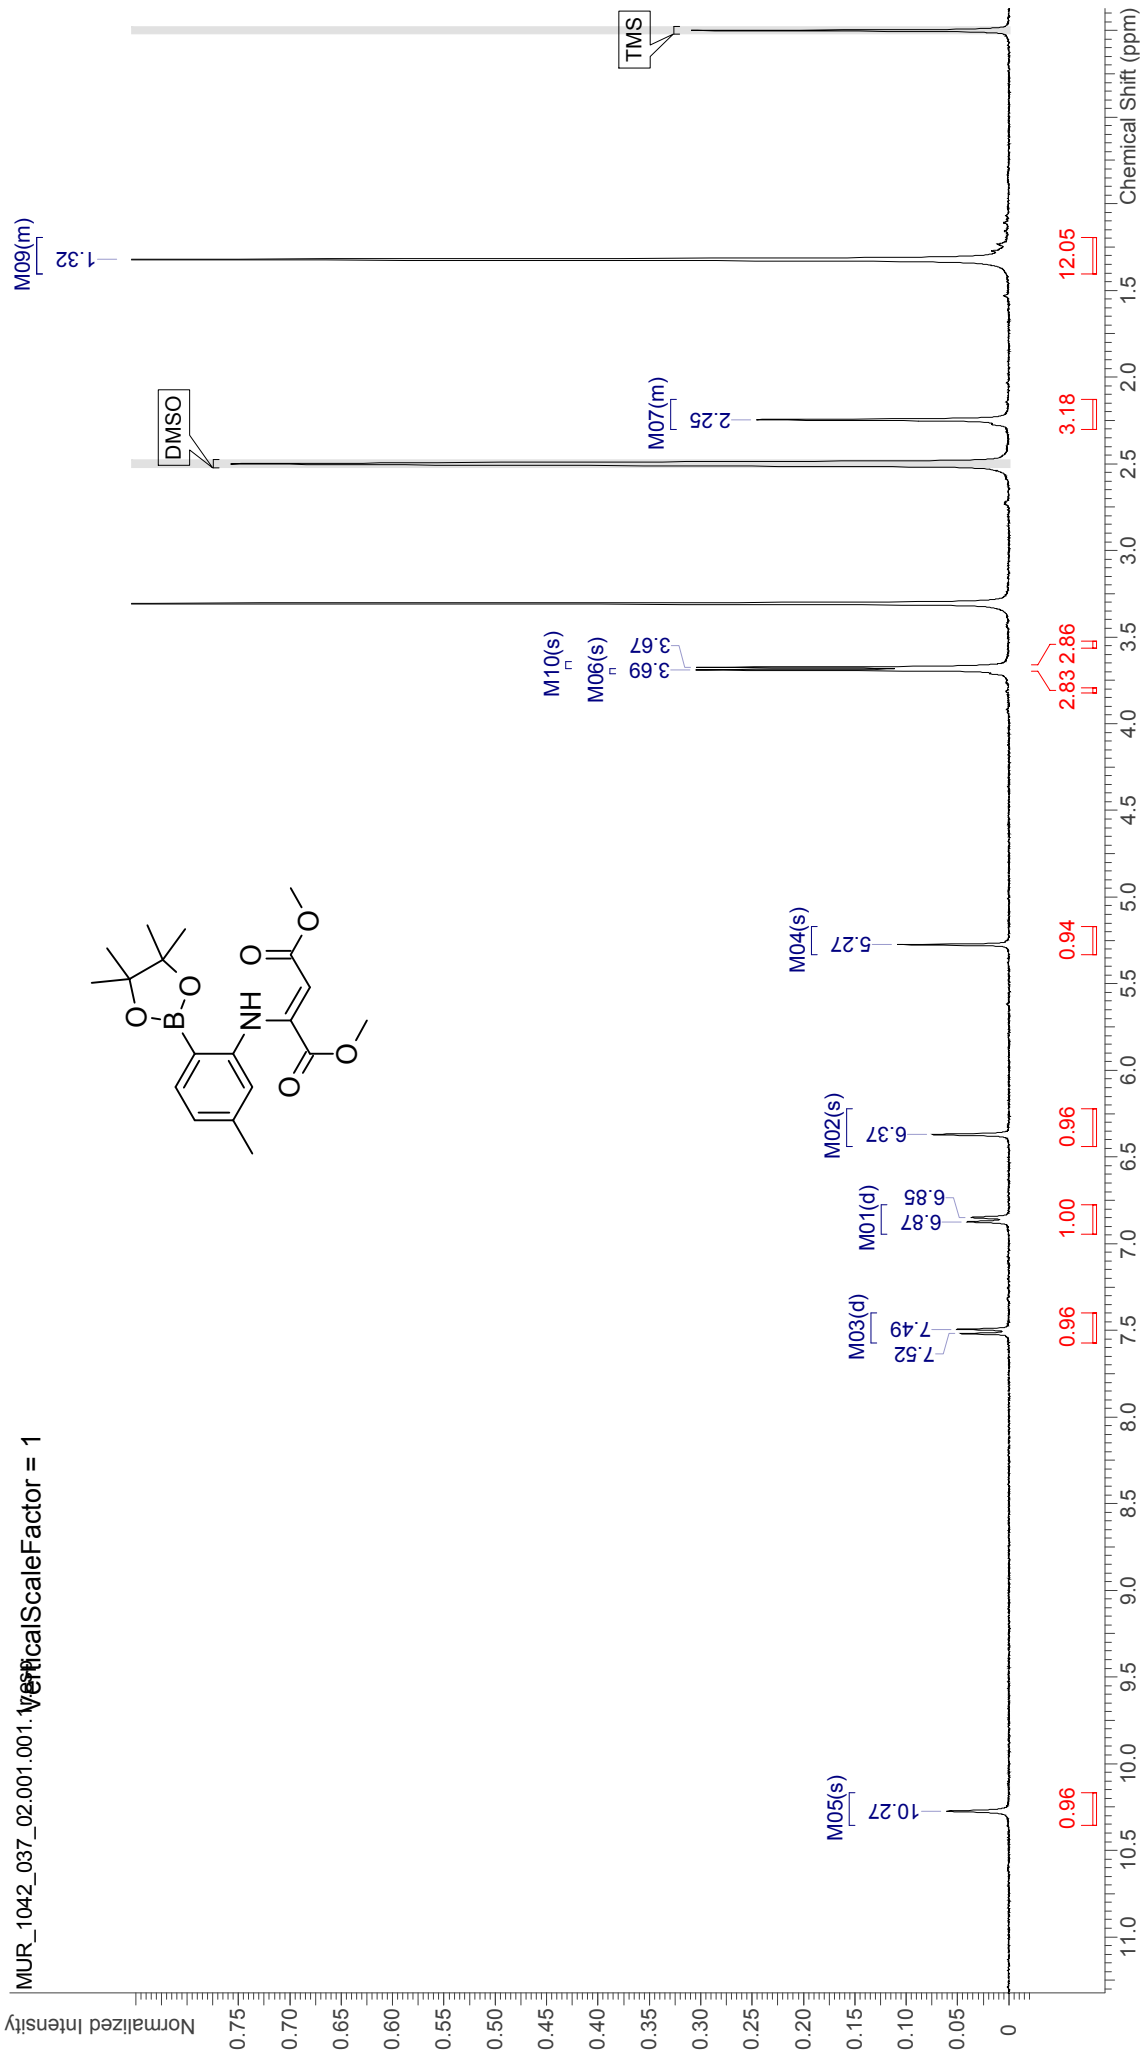

| OriginalDateForRelativeTime | 2014-04-20T00:34:16  | Multiplets Integrals Sum                    | 0.00                                                                | Number of Nuclei       | 0 C's                |
|-----------------------------|----------------------|---------------------------------------------|---------------------------------------------------------------------|------------------------|----------------------|
| Acquisition Time (sec)      | 1.0912               | C13CPD DMSO (F:\ecm\DATA\2014-04\} bionmr-1 |                                                                     | Date                   | 20 Apr 2014 00:34:16 |
| Date Stamp                  | 20 Apr 2014 00:34:16 | File Name                                   | \\inbgrdsfp01\ELN\data\MUR\MURUGAN-CARBONMUR_1042_037_02\1\data\11r | Origin                 | spect                |
| Frequency (MHz)             | 125.77               | Nucleus                                     | 13C                                                                 | Points Count           | 32768                |
| Original Points Count       | 32768                | Owner                                       | administrator                                                       | Solvent                | DMSO-d6              |
| Receiver Gain               | 32768.00             | SW(cyclical) (Hz)                           | 30030.03                                                            | Temperature (degree C) | 25.000               |
| Spectrum Type               | STANDARD             | Sweep Width (Hz)                            | 30029.11                                                            |                        |                      |

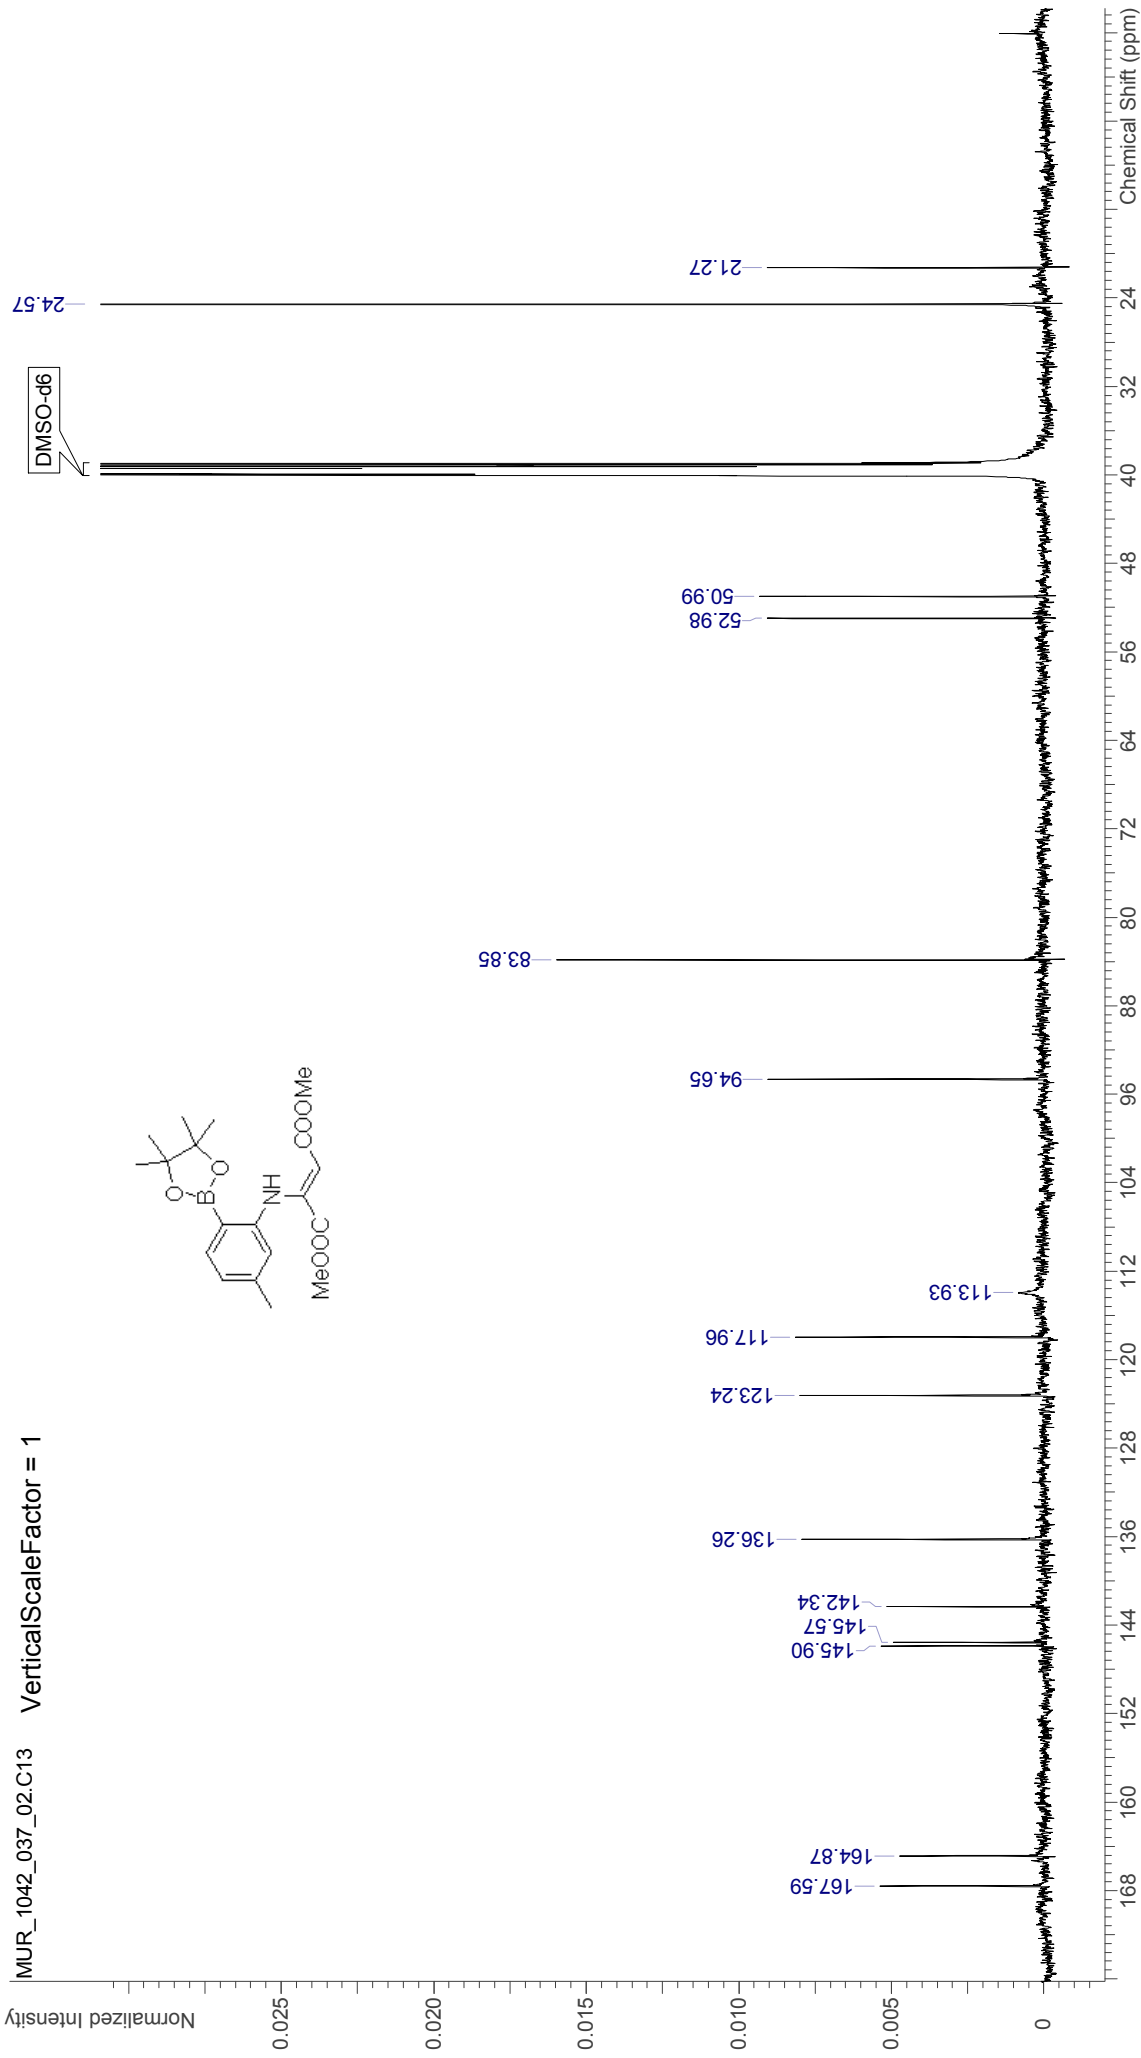

|                                                        |                                                                                     |                                       |                                       |                                |  |
|--------------------------------------------------------|-------------------------------------------------------------------------------------|---------------------------------------|---------------------------------------|--------------------------------|--|
| <b>OriginalDateForRelativeTime</b> 2014-02-15T13:03:04 |                                                                                     | <b>Multiplets Integrals Sum</b> 10.78 |                                       | <b>Number of Nuclei</b> 11 H's |  |
| <b>Acquisition Time (sec)</b> 5.3084                   | <b>Comment</b> MUR_1042_038,dms0                                                    | <b>Date</b> 15 Feb 2014 13:03:04      |                                       |                                |  |
| <b>Date Stamp</b> 15 Feb 2014 13:03:04                 | <b>File Name</b> \\inbglab176164\ecm_2014\MUR\data\IMED\nmr\MUR_1042_038\1\data1\1r | <b>Origin</b> av300                   |                                       |                                |  |
| <b>Frequency (MHz)</b> 300.13                          | <b>Nucleus</b> 1H                                                                   | <b>Number of Transients</b> 128       | <b>Pulse Sequence</b> zg30            |                                |  |
| <b>Original Points Count</b> 32768                     | <b>Owner</b> administrator                                                          | <b>Points Count</b> 32768             | <b>Solvent</b> DMSO-d6                |                                |  |
| <b>Receiver Gain</b> 1625.50                           | <b>SW(cyclical) (Hz)</b> 6172.84                                                    | <b>Solvent</b> DMSO-d6                | <b>Spectrum Offset (Hz)</b> 1853.4237 |                                |  |
| <b>Spectrum Type</b> STANDARD                          | <b>Sweep Width (Hz)</b> 6172.65                                                     | <b>Temperature (degree C)</b> 25.000  |                                       |                                |  |

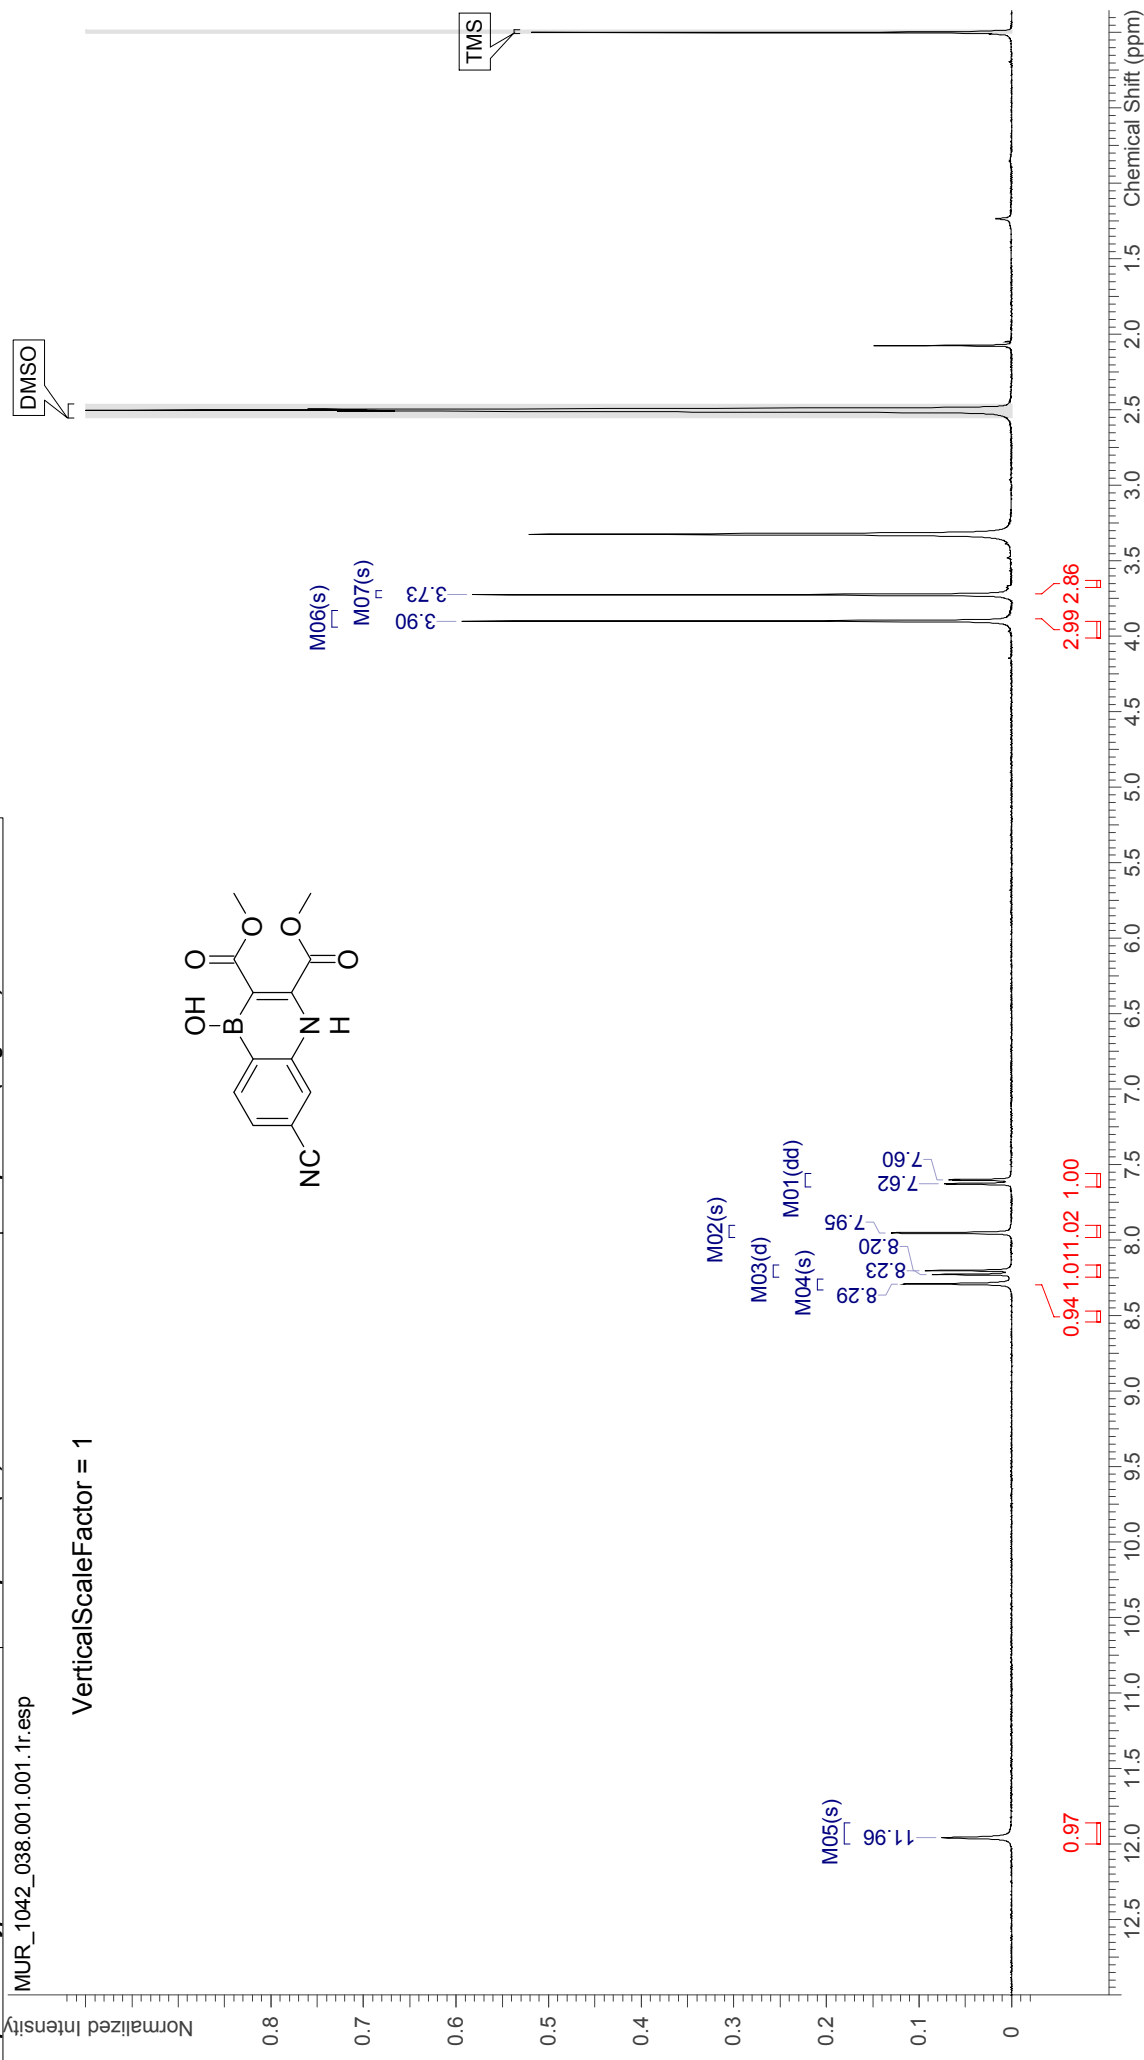

| OriginalDateForRelativeTime | 2014-02-28T16:08:40                                   | Multiplets Integrals Sum | 0.00                                                    | Number of Nuclei  | 0 C's         |
|-----------------------------|-------------------------------------------------------|--------------------------|---------------------------------------------------------|-------------------|---------------|
| Acquisition Time (sec)      | 1.0912                                                | Comment                  | MUR_1042_38 C-13CPD DMSO (F:\ecm\DATA\2013-11} bionmr 2 |                   |               |
| Date                        | 28 Feb 2014 16:08:40                                  | Date Stamp               | 28 Feb 2014 16:08:40                                    |                   |               |
| File Name                   | C:\Users\kvjk299\Desktop\C13\MUR_1042_38\1\pdata\1\1r | Frequency (MHz)          | 125.77                                                  | Nucleus           | 13C           |
| Number of Transients        | 3651                                                  | Original Points Count    | 32768                                                   | Owner             | administrator |
| Points Count                | 32768                                                 | Pulse Sequence           | z9pg30                                                  | SW(cyclical) (Hz) | 30030.03      |
| Solvent                     | DMSO-d6                                               | Spectrum Offset (Hz)     | 12506.0303                                              | Spectrum Type     | STANDARD      |
| Temperature (degree C)      | 25.000                                                |                          |                                                         | Sweep Width (Hz)  | 30029.11      |

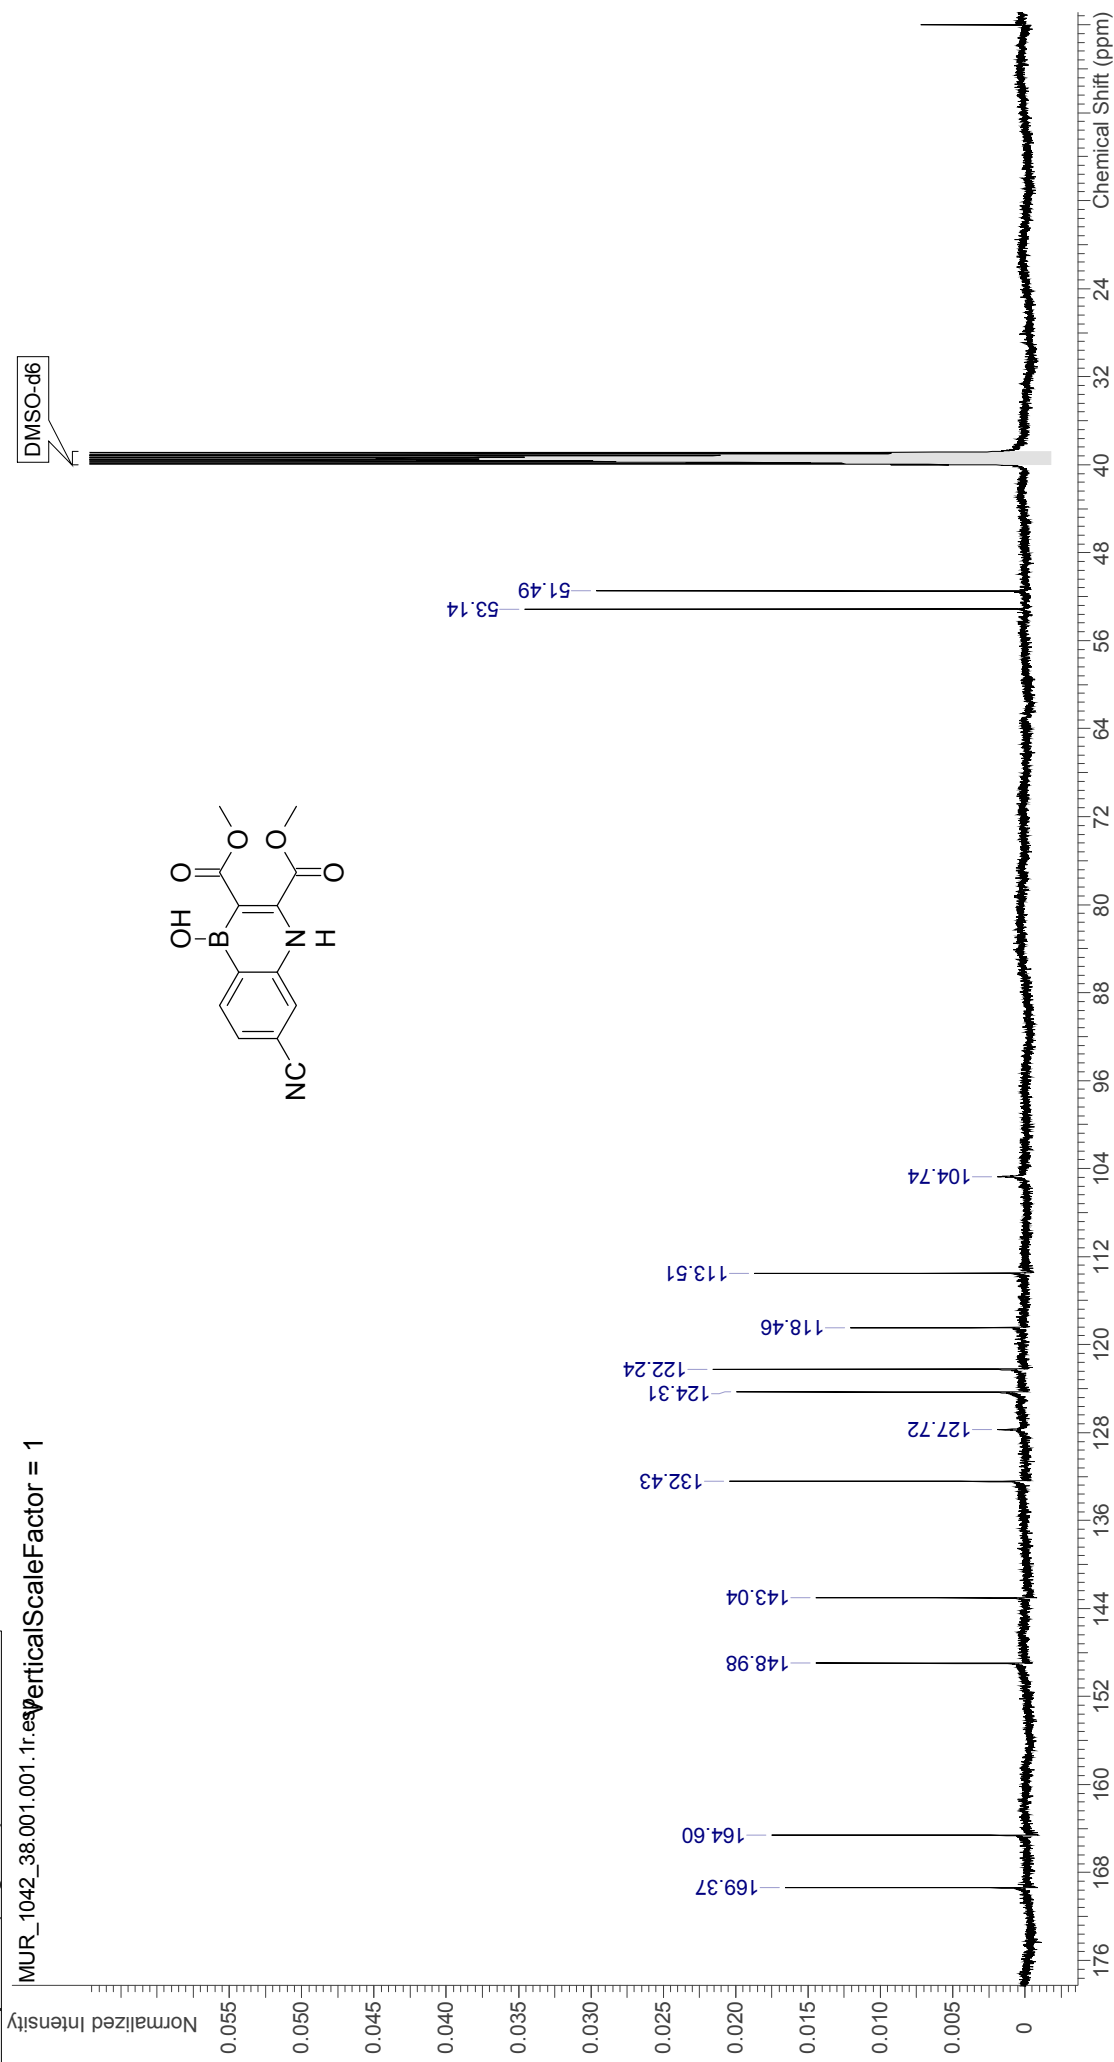

| OriginalDateForRelativeTime |                      | 2014-05-13T15:32:24 |             | MUR-BORON-2          |                                                                    | Multiplets Integrals Sum |                      | 0.00                 |        | Number of Nuclei       |         | 4 B's                 |          |
|-----------------------------|----------------------|---------------------|-------------|----------------------|--------------------------------------------------------------------|--------------------------|----------------------|----------------------|--------|------------------------|---------|-----------------------|----------|
| Acquisition Time (sec)      | 0.8503               | Comment             | MUR-BORON-2 | File Name            | \\inbglab176164\ecm_2014\MUR\data\IMED\vnmr\MUR-BORON-2\1\data\11r | Date                     | 13 May 2014 15:32:24 | Number of Transients | 2080   | Origin                 | av300   | Original Points Count | 32768    |
| Date Stamp                  | 13 May 2014 15:32:24 | Nucleus             | 11B         | Number of Transients | 2080                                                               | Origin                   | av300                | Pulse Sequence       | zg     | Receiver Gain          | 5160.60 | SW(cyclical) (Hz)     | 38535.64 |
| Frequency (MHz)             | 96.29                | Points Count        | 32768       | Spectrum Type        | STANDARD                                                           | Sweep Width (Hz)         | 38534.47             | Spectrum Offset (Hz) | 0.0038 | Temperature (degree C) | 25.000  |                       |          |
| Owner                       | administrator        |                     |             |                      |                                                                    |                          |                      |                      |        |                        |         |                       |          |
| Solvent                     | DMSO-d6              |                     |             |                      |                                                                    |                          |                      |                      |        |                        |         |                       |          |

MUR-BORON-2.001.001.1r.esq VerticalScaleFactor = 1

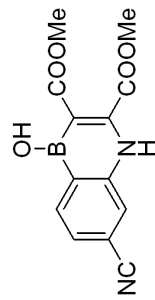

3c

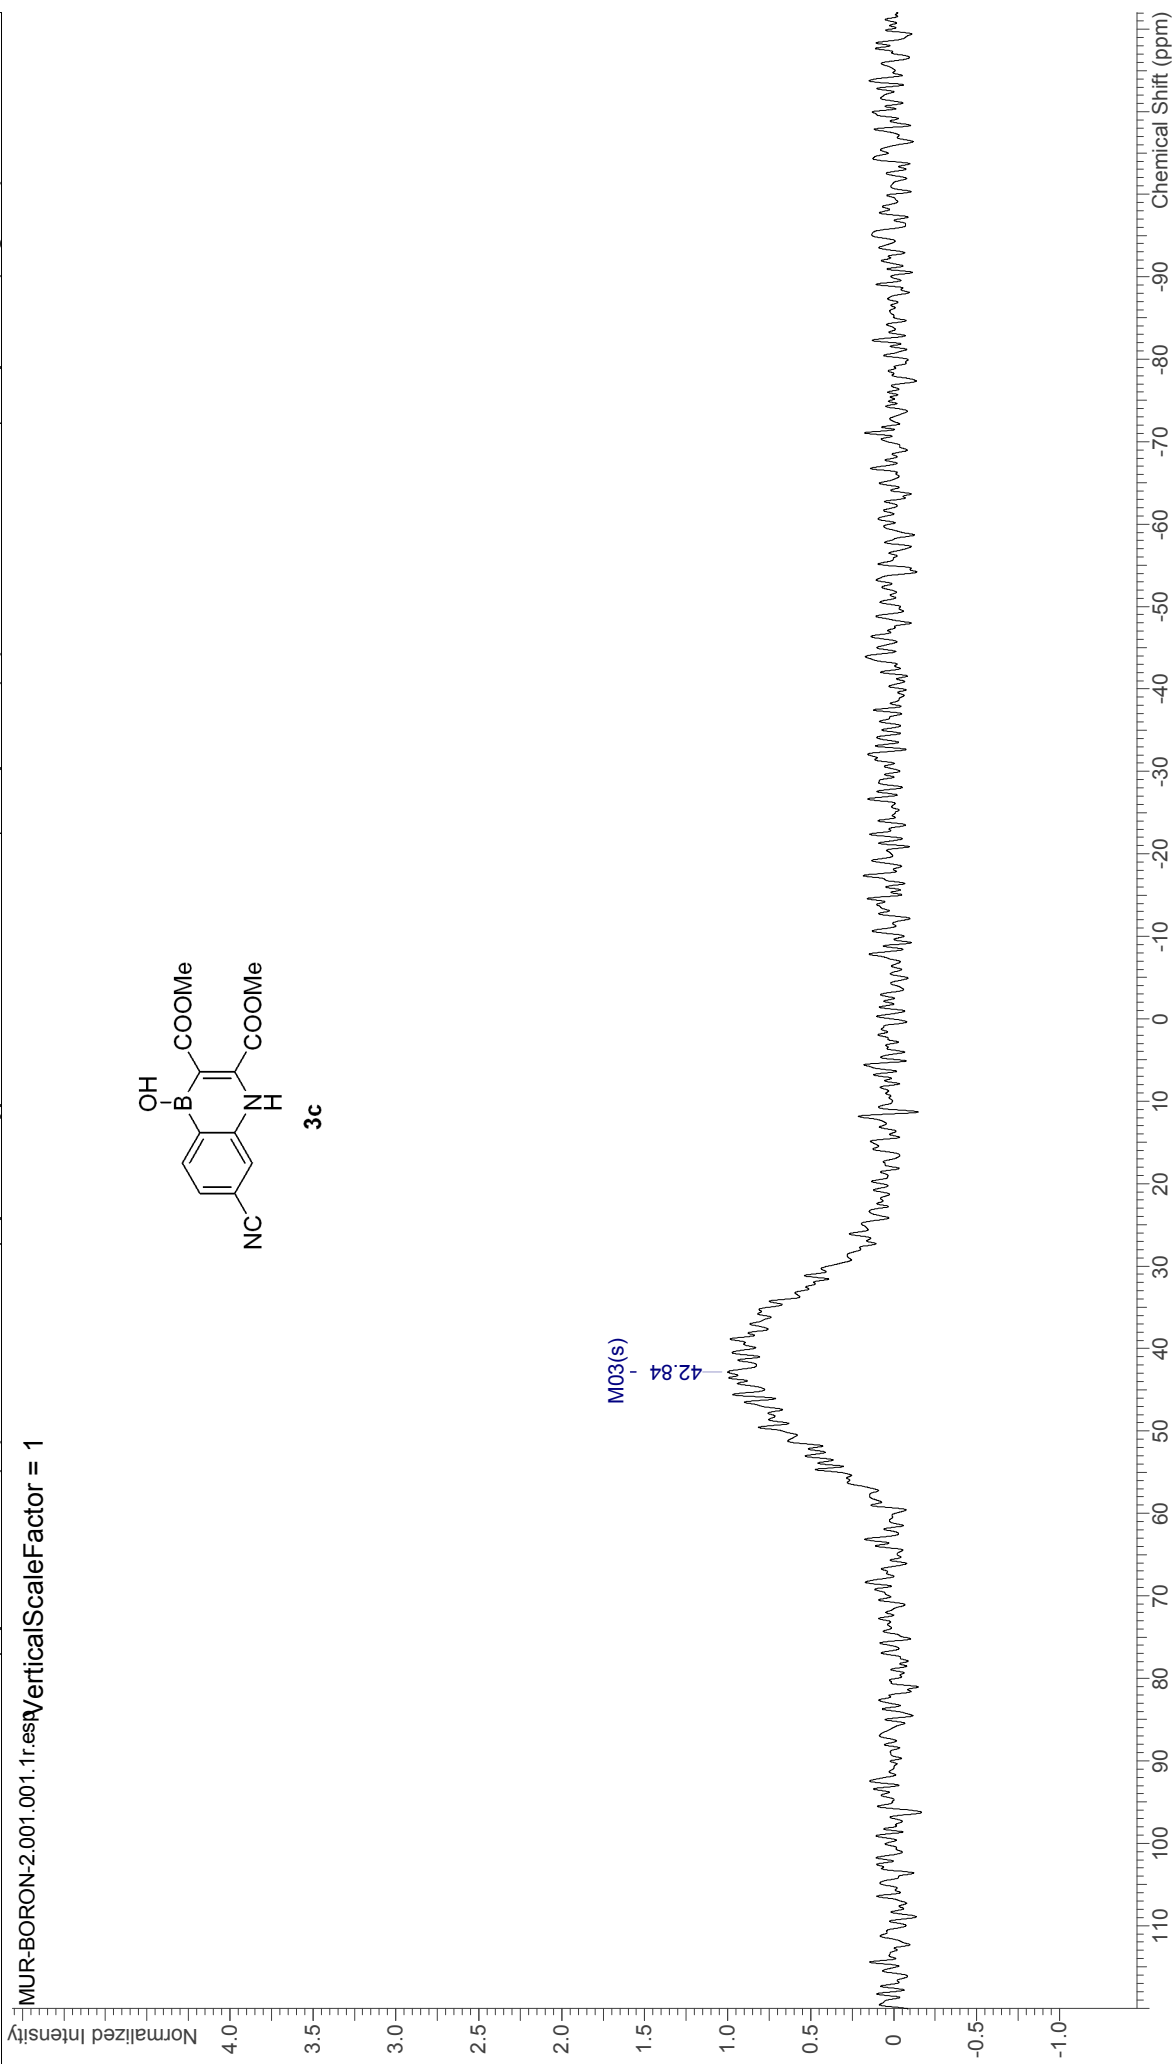

|                                                        |                                                                              |                                       |  |                                |  |
|--------------------------------------------------------|------------------------------------------------------------------------------|---------------------------------------|--|--------------------------------|--|
| <b>OriginalDateForRelativeTime</b> 2014-03-30T10:27:20 |                                                                              | <b>Multiplets Integrals Sum</b> 13.79 |  | <b>Number of Nuclei</b> 14 H's |  |
| <b>Acquisition Time (sec)</b> 5.3084                   | <b>Comment</b> MUR_1042_044S                                                 | <b>Date</b> 30 Mar 2014 10:27:20      |  |                                |  |
| <b>Date Stamp</b> 30 Mar 2014 10:27:20                 | <b>File Name</b> \\inbglab176164\ecm_2014\MUR\data\1\MUR_1042_044S1\pdata11r | <b>Origin</b> av300                   |  |                                |  |
| <b>Frequency (MHz)</b> 300.13                          | <b>Nucleus</b> 1H                                                            | <b>Pulse Sequence</b> zg30            |  |                                |  |
| <b>Original Points Count</b> 32768                     | <b>Owner</b> administrator                                                   | <b>Solvent</b> DMSO-d6                |  |                                |  |
| <b>Receiver Gain</b> 1149.40                           | <b>SW(cyclical) (Hz)</b> 6172.84                                             | <b>Temperature (degree C)</b> 25.000  |  |                                |  |
| <b>Spectrum Type</b> STANDARD                          | <b>Sweep Width (Hz)</b> 6172.65                                              |                                       |  |                                |  |

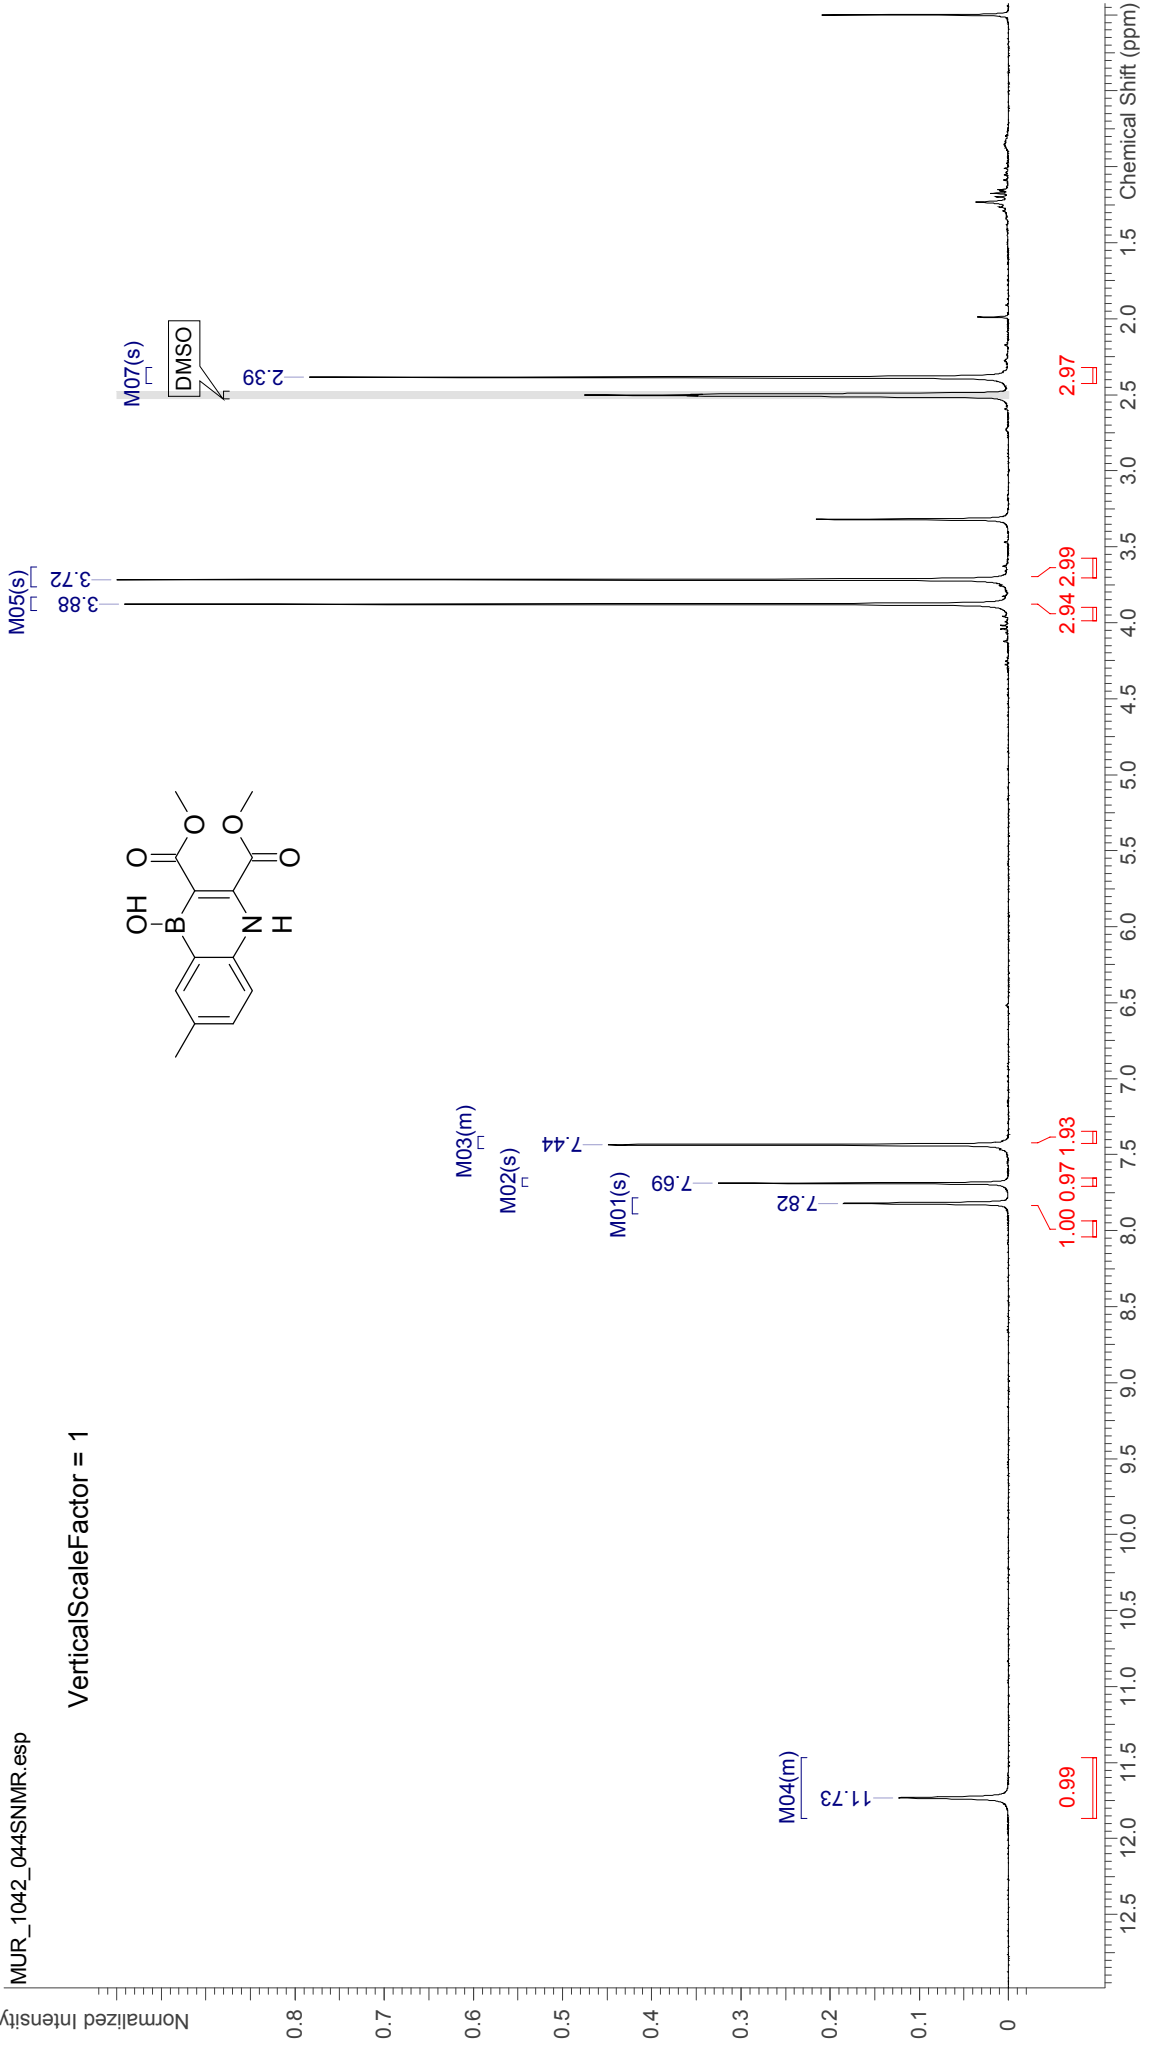

|                                    |                      |                                 |                                                         |                               |                                                                      |
|------------------------------------|----------------------|---------------------------------|---------------------------------------------------------|-------------------------------|----------------------------------------------------------------------|
| <b>OriginalDateForRelativeTime</b> | 2014-03-29T20:33:12  | <b>Multiplets Integrals Sum</b> | 0.00                                                    | <b>Number of Nuclei</b>       | 0 C's                                                                |
| <b>Acquisition Time (sec)</b>      | 1.0912               | <b>Comment</b>                  | mur_1042_44 C-13CPD DMSO (F:\ecm\DATA\2013-11} bionmr 2 | <b>Date</b>                   | 29 Mar 2014 20:33:12                                                 |
| <b>Date Stamp</b>                  | 29 Mar 2014 20:33:12 | <b>Nucleus</b>                  | 13C                                                     | <b>File Name</b>              | C:\Users\kvjk299\l\Desktop\C13\recent c13\MUR_1042_044C13\1\data\11r |
| <b>Frequency (MHz)</b>             | 125.77               | <b>Owner</b>                    | administrator                                           | <b>Number of Transients</b>   | 8000                                                                 |
| <b>Original Points Count</b>       | 32768                | <b>SW(cyclical) (Hz)</b>        | 30030.03                                                | <b>Points Count</b>           | 32768                                                                |
| <b>Receiver Gain</b>               | 32768.00             | <b>Sweep Width (Hz)</b>         | 30029.11                                                | <b>Solvent</b>                | DMSO-d6                                                              |
| <b>Spectrum Type</b>               | STANDARD             | <b>VerticalScaleFactor</b>      | 1                                                       | <b>Temperature (degree C)</b> | 25.000                                                               |
|                                    |                      |                                 |                                                         | <b>Pulse Sequence</b>         | zpgg30                                                               |
|                                    |                      |                                 |                                                         | <b>Spectrum Offset (Hz)</b>   | 12648.9443                                                           |

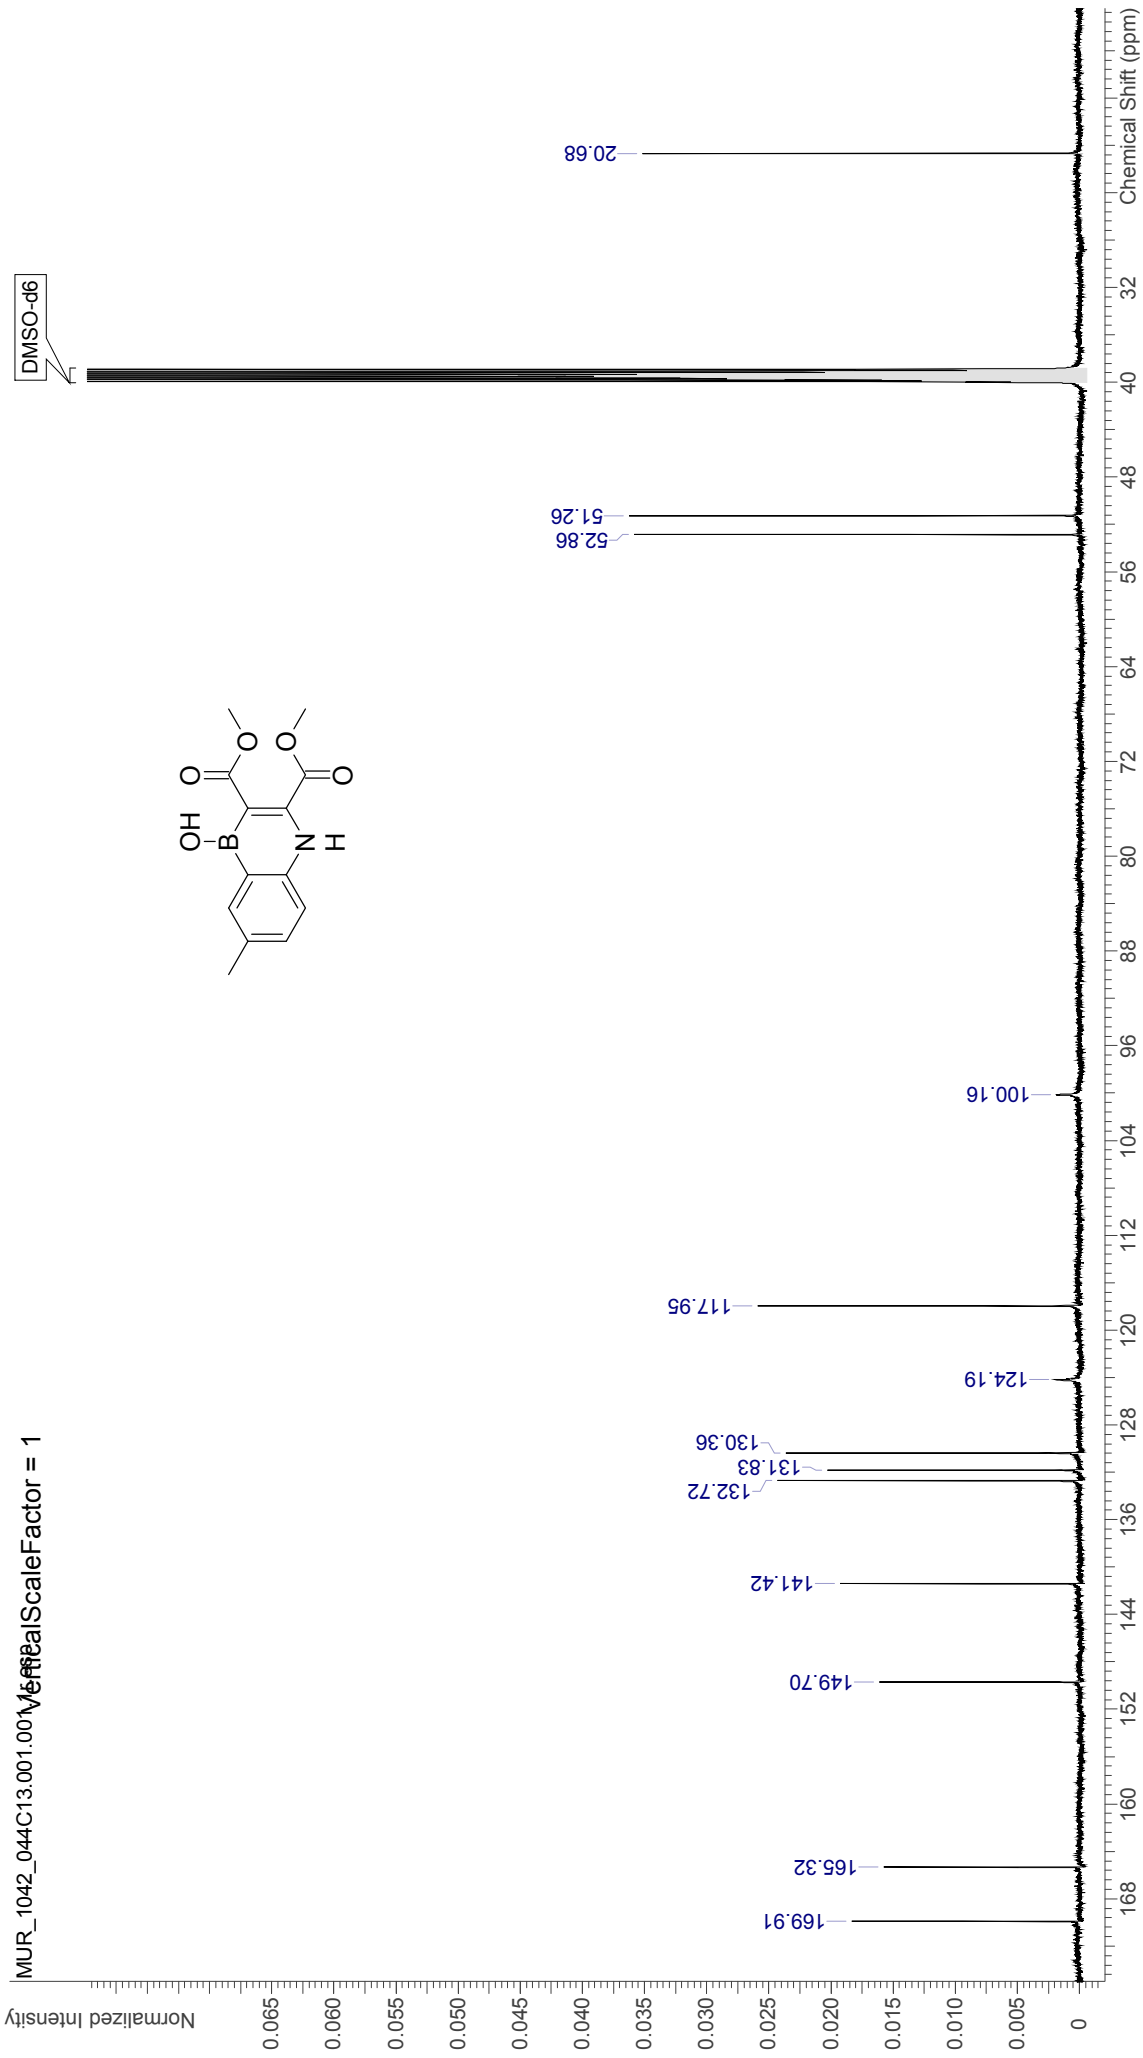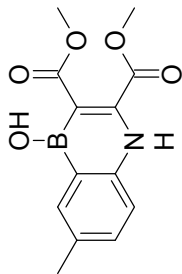



|                                                        |                      |                                      |                                                                |                               |                      |
|--------------------------------------------------------|----------------------|--------------------------------------|----------------------------------------------------------------|-------------------------------|----------------------|
| <b>OriginalDateForRelativeTime</b> 2014-04-10T13:30:48 |                      | <b>Multiplets Integrals Sum</b> 0.00 |                                                                | <b>Number of Nuclei</b> 0 B's |                      |
| <b>Acquisition Time (sec)</b>                          | 1.7007               | <b>Comment</b> MUR-044BORON          |                                                                | <b>Date</b>                   | 10 Apr 2014 13:30:48 |
| <b>Date Stamp</b>                                      | 10 Apr 2014 13:30:48 | <b>File Name</b>                     | \inbgjlab176164\ecom 2014\MUR\data\IMED\m\m\MUR-044BORON\1.fid |                               |                      |
| <b>Frequency (MHz)</b>                                 | 96.29                | <b>Nucleus</b>                       | 11B                                                            | <b>Origin</b>                 | av300                |
| <b>Owner</b>                                           | administrator        | <b>Points Count</b>                  | 32768                                                          | <b>Receiver Gain</b>          | 3649.10              |
| <b>Solvent</b>                                         | DMSO-d6              | <b>Spectrum Offset (Hz)</b>          | 0.1662                                                         | <b>Spectrum Type</b>          | STANDARD             |
|                                                        |                      | <b>Pulse Sequence</b>                | zg                                                             | <b>Sweep Width (Hz)</b>       | 19267.23             |
|                                                        |                      | <b>Number of Transients</b>          | 1024                                                           | <b>SW(cyclical) (Hz)</b>      | 19267.82             |
|                                                        |                      | <b>VerticalScaleFactor</b>           | = 1                                                            | <b>Temperature (degree C)</b> | 25.000               |

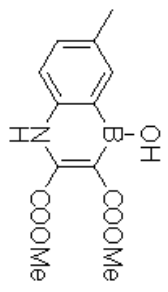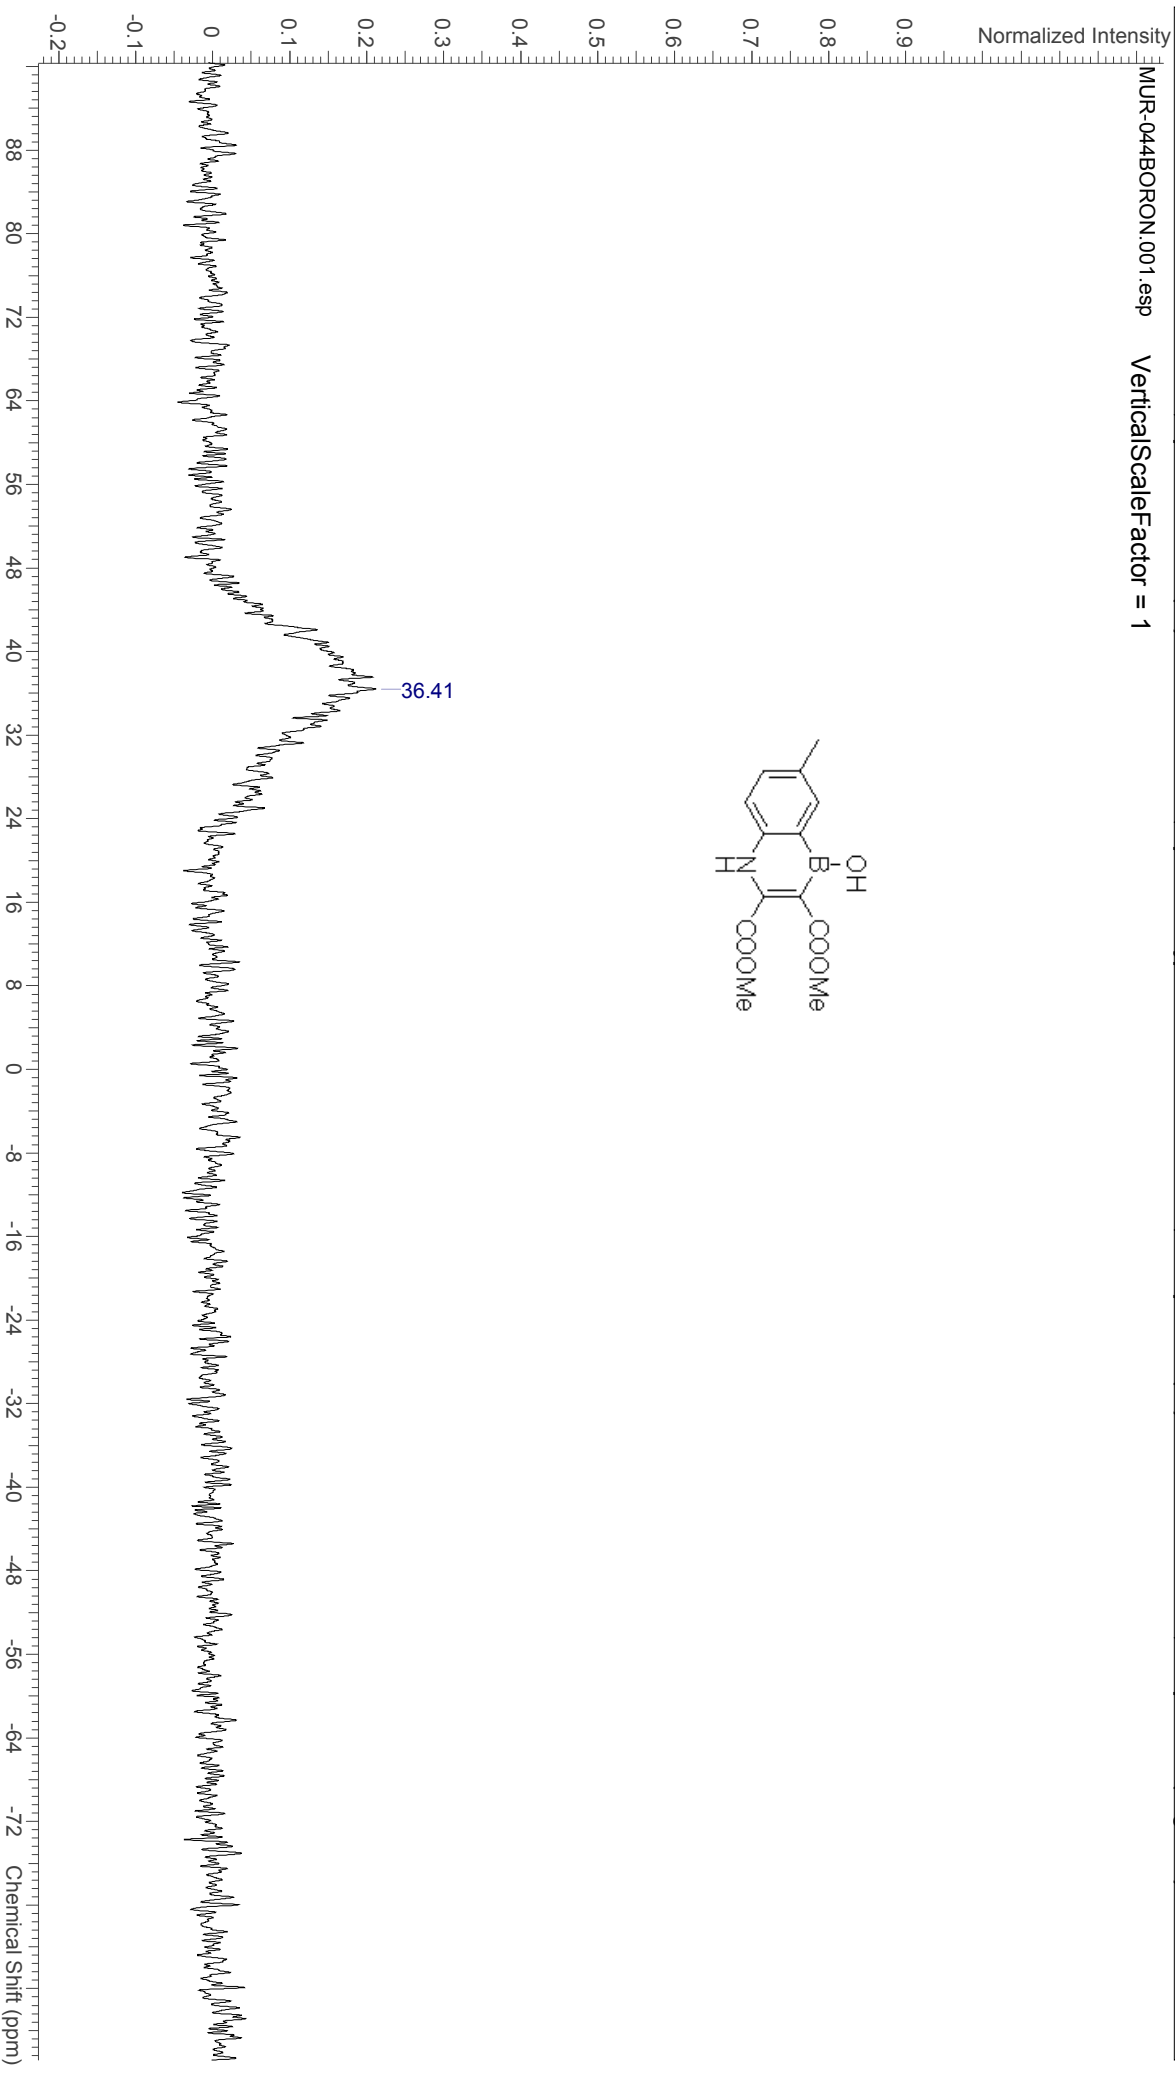

|                                                        |                                  |                                                                                        |  |                                       |  |
|--------------------------------------------------------|----------------------------------|----------------------------------------------------------------------------------------|--|---------------------------------------|--|
| <b>OriginalDateForRelativeTime</b> 2014-04-11T11:20:40 |                                  | <b>Multiplets Integrals Sum</b> 25.62                                                  |  | <b>Number of Nuclei</b> 26 H's        |  |
| <b>Acquisition Time (sec)</b> 5.3084                   | <b>Comment</b> MUR_1042_044_02   | <b>Date</b> 11 Apr 2014 11:20:40                                                       |  |                                       |  |
| <b>Date Stamp</b> 11 Apr 2014 11:20:40                 | <b>Nucleus</b> 1H                | <b>File Name</b> \\inbglab176164\ecm_2014\MUR\data\1MED\nmr\MUR_1042_044_02\1\data\11r |  |                                       |  |
| <b>Frequency (MHz)</b> 300.13                          | <b>Owner</b> administrator       | <b>Origin</b> av300                                                                    |  |                                       |  |
| <b>Original Points Count</b> 32768                     | <b>SW(cyclical) (Hz)</b> 6172.84 | <b>Pulse Sequence</b> zg30                                                             |  |                                       |  |
| <b>Receiver Gain</b> 1625.50                           | <b>Sweep Width (Hz)</b> 6172.65  | <b>Solvent</b> DMSO-d6                                                                 |  | <b>Spectrum Offset (Hz)</b> 1853.6218 |  |
| <b>Spectrum Type</b> STANDARD                          |                                  | <b>Temperature (degree C)</b> 25.000                                                   |  |                                       |  |

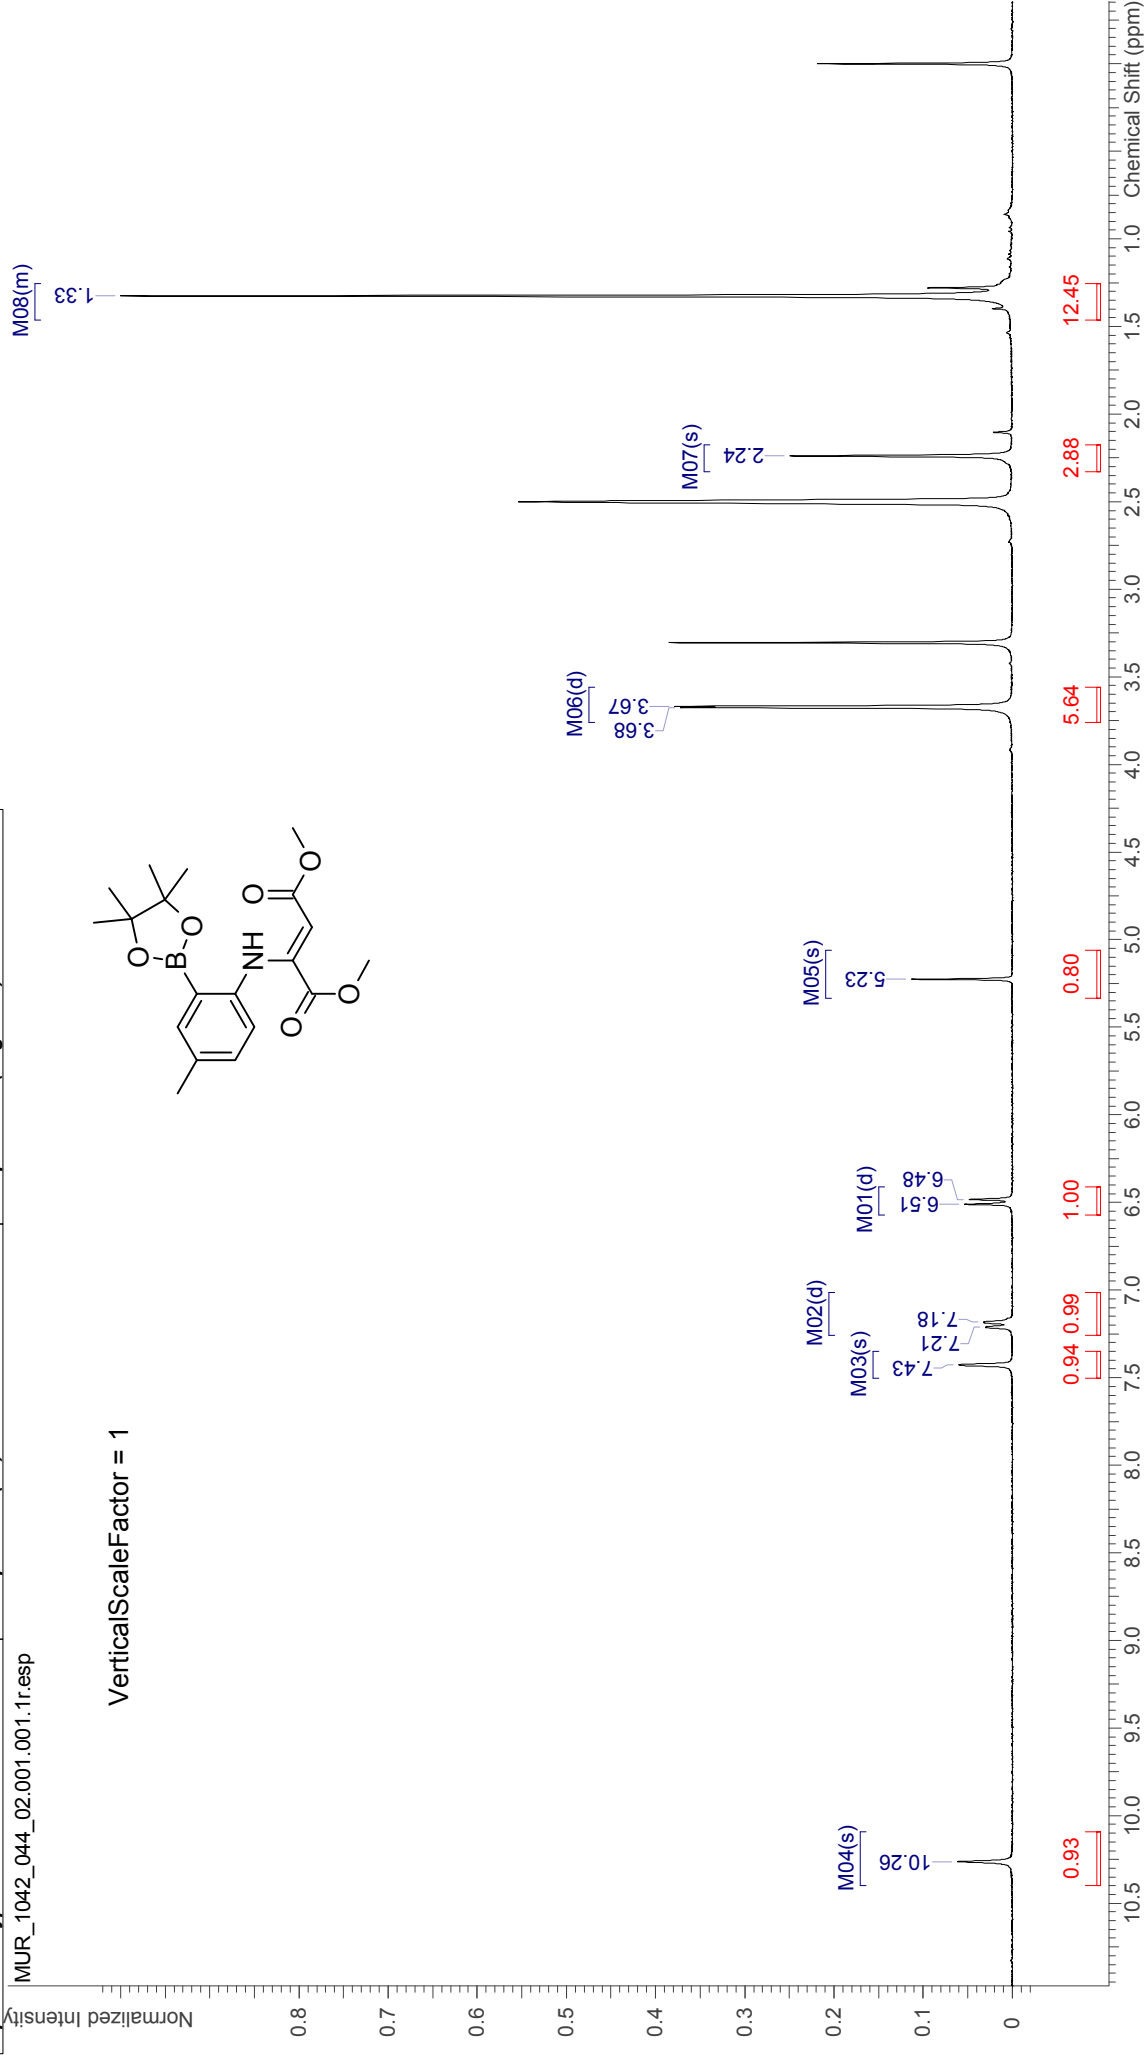

| OriginalDateForRelativeTime | 2014-05-12T00:15:04  | Multiplets Integrals Sum                                 | 0.00          | Number of Nuclei       | 0 C's                |
|-----------------------------|----------------------|----------------------------------------------------------|---------------|------------------------|----------------------|
| Acquisition Time (sec)      | 1.0912               | C-13CPD DMSO (F:\ecm\DATA\2014-04} bionmr-1              |               | Date                   | 12 May 2014 00:15:04 |
| Date Stamp                  | 12 May 2014 00:15:04 | \\inbgrdsp01\ELN\data\MUR\mur_1042_044_02fc13\1\data\11r |               | File Name              |                      |
| Frequency (MHz)             | 125.77               | Nucleus                                                  | 13C           | Origin                 | spect                |
| Original Points Count       | 32768                | Owner                                                    | administrator | Pulse Sequence         | zpgg30               |
| Receiver Gain               | 32768.00             | SW(cyclical) (Hz)                                        | 30030.03      | Spectrum Offset (Hz)   | 12515.1611           |
| Spectrum Type               | STANDARD             | Sweep Width (Hz)                                         | 30029.11      | Temperature (degree C) | 25.000               |

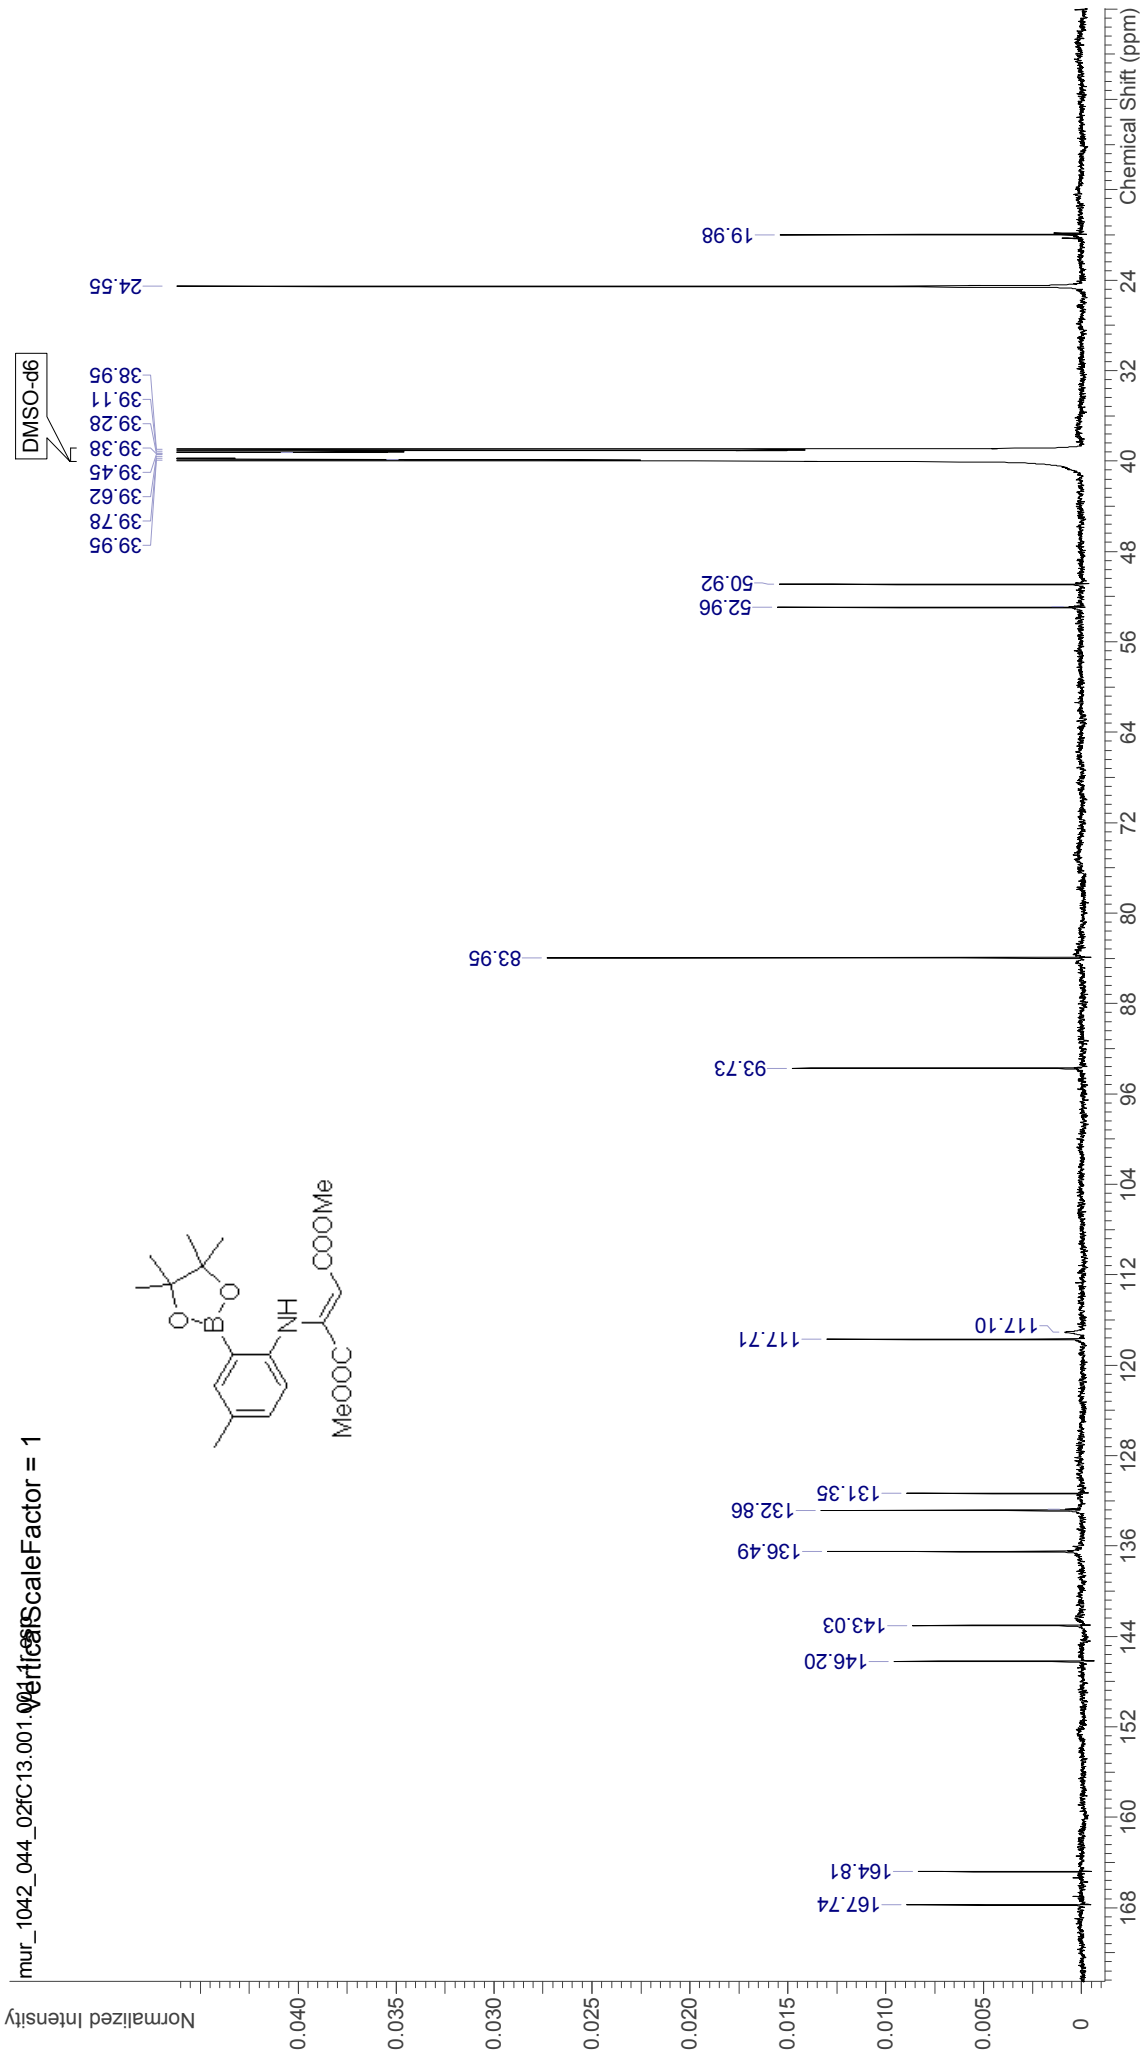

|                                                        |                                                                                 |                                       |  |                                |  |
|--------------------------------------------------------|---------------------------------------------------------------------------------|---------------------------------------|--|--------------------------------|--|
| <b>OriginalDateForRelativeTime</b> 2014-03-26T13:41:28 |                                                                                 | <b>Multiplets Integrals Sum</b> 10.83 |  | <b>Number of Nuclei</b> 11 H's |  |
| <b>Acquisition Time (sec)</b> 5.3084                   | <b>Comment</b> MUR_1042_086                                                     | <b>Date</b> 26 Mar 2014 13:41:28      |  |                                |  |
| <b>Date Stamp</b> 26 Mar 2014 13:41:28                 | <b>File Name</b> \\inbglab176164\ecm_2014\MUR\data\med\mm\MUR_1042_0862\data11r | <b>Origin</b> av300                   |  |                                |  |
| <b>Frequency (MHz)</b> 300.13                          | <b>Nucleus</b> 1H                                                               | <b>Pulse Sequence</b> zg30            |  |                                |  |
| <b>Original Points Count</b> 32768                     | <b>Owner</b> administrator                                                      | <b>Spectrum Offset (Hz)</b> 1853.7506 |  |                                |  |
| <b>Receiver Gain</b> 1625.50                           | <b>SW(cyclical) (Hz)</b> 6172.84                                                | <b>Temperature (degree C)</b> 25.000  |  |                                |  |
| <b>Spectrum Type</b> STANDARD                          | <b>Sweep Width (Hz)</b> 6172.65                                                 |                                       |  |                                |  |

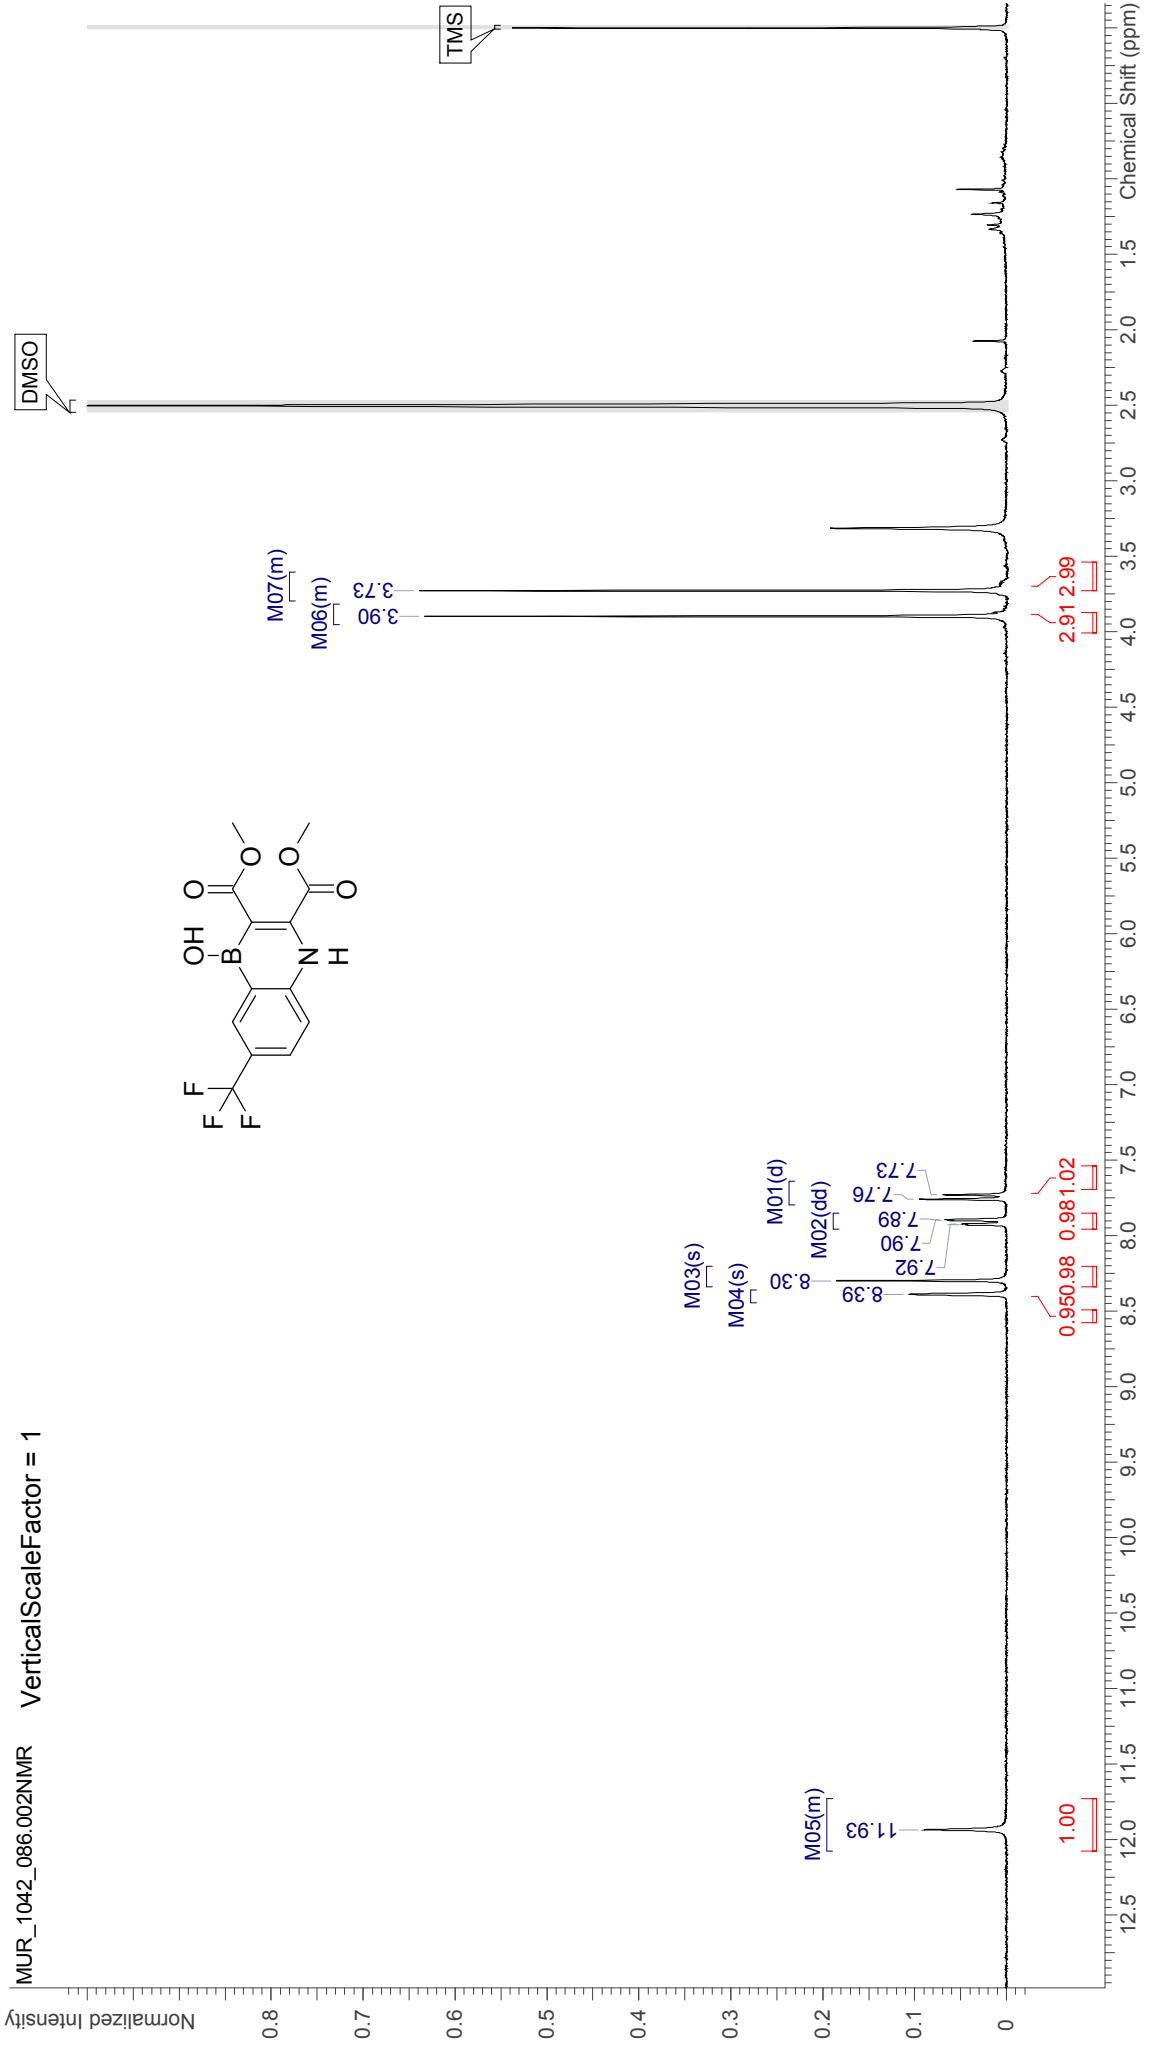

|                                                        |                                                                                           |                                      |                                        |                               |  |
|--------------------------------------------------------|-------------------------------------------------------------------------------------------|--------------------------------------|----------------------------------------|-------------------------------|--|
| <b>OriginalDateForRelativeTime</b> 2014-03-28T18:35:52 |                                                                                           | <b>Multiplets Integrals Sum</b> 0.00 |                                        | <b>Number of Nuclei</b> 0 C's |  |
| <b>Acquisition Time (sec)</b> 1.0912                   | <b>Comment</b> MUR_1042_086 C-13CPD DMSO (F:\ecm\DATA\2014-03} bionmr-1                   | <b>Date</b> 28 Mar 2014 18:35:52     |                                        |                               |  |
| <b>Date Stamp</b> 28 Mar 2014 18:35:52                 | <b>File Name</b> C:\Users\kyjk299\Desktop\C13ELN folder\MURUGAN-CARBON\MUR_1042_086\1\fid |                                      |                                        |                               |  |
| <b>Frequency (MHz)</b> 125.77                          | <b>Nucleus</b> 13C                                                                        | <b>Number of Transients</b> 8000     | <b>Origin</b> spect                    |                               |  |
| <b>Original Points Count</b> 32768                     | <b>Owner</b> administrator                                                                | <b>Points Count</b> 32768            | <b>Pulse Sequence</b> zpgg30           |                               |  |
| <b>Receiver Gain</b> 32768.00                          | <b>SW(cyclical) (Hz)</b> 30030.03                                                         | <b>Solvent</b> DMSO-d6               | <b>Spectrum Offset (Hz)</b> 12680.6025 |                               |  |
| <b>Spectrum Type</b> STANDARD                          | <b>Sweep Width (Hz)</b> 30029.11                                                          | <b>Temperature (degree C)</b> 25.000 |                                        |                               |  |

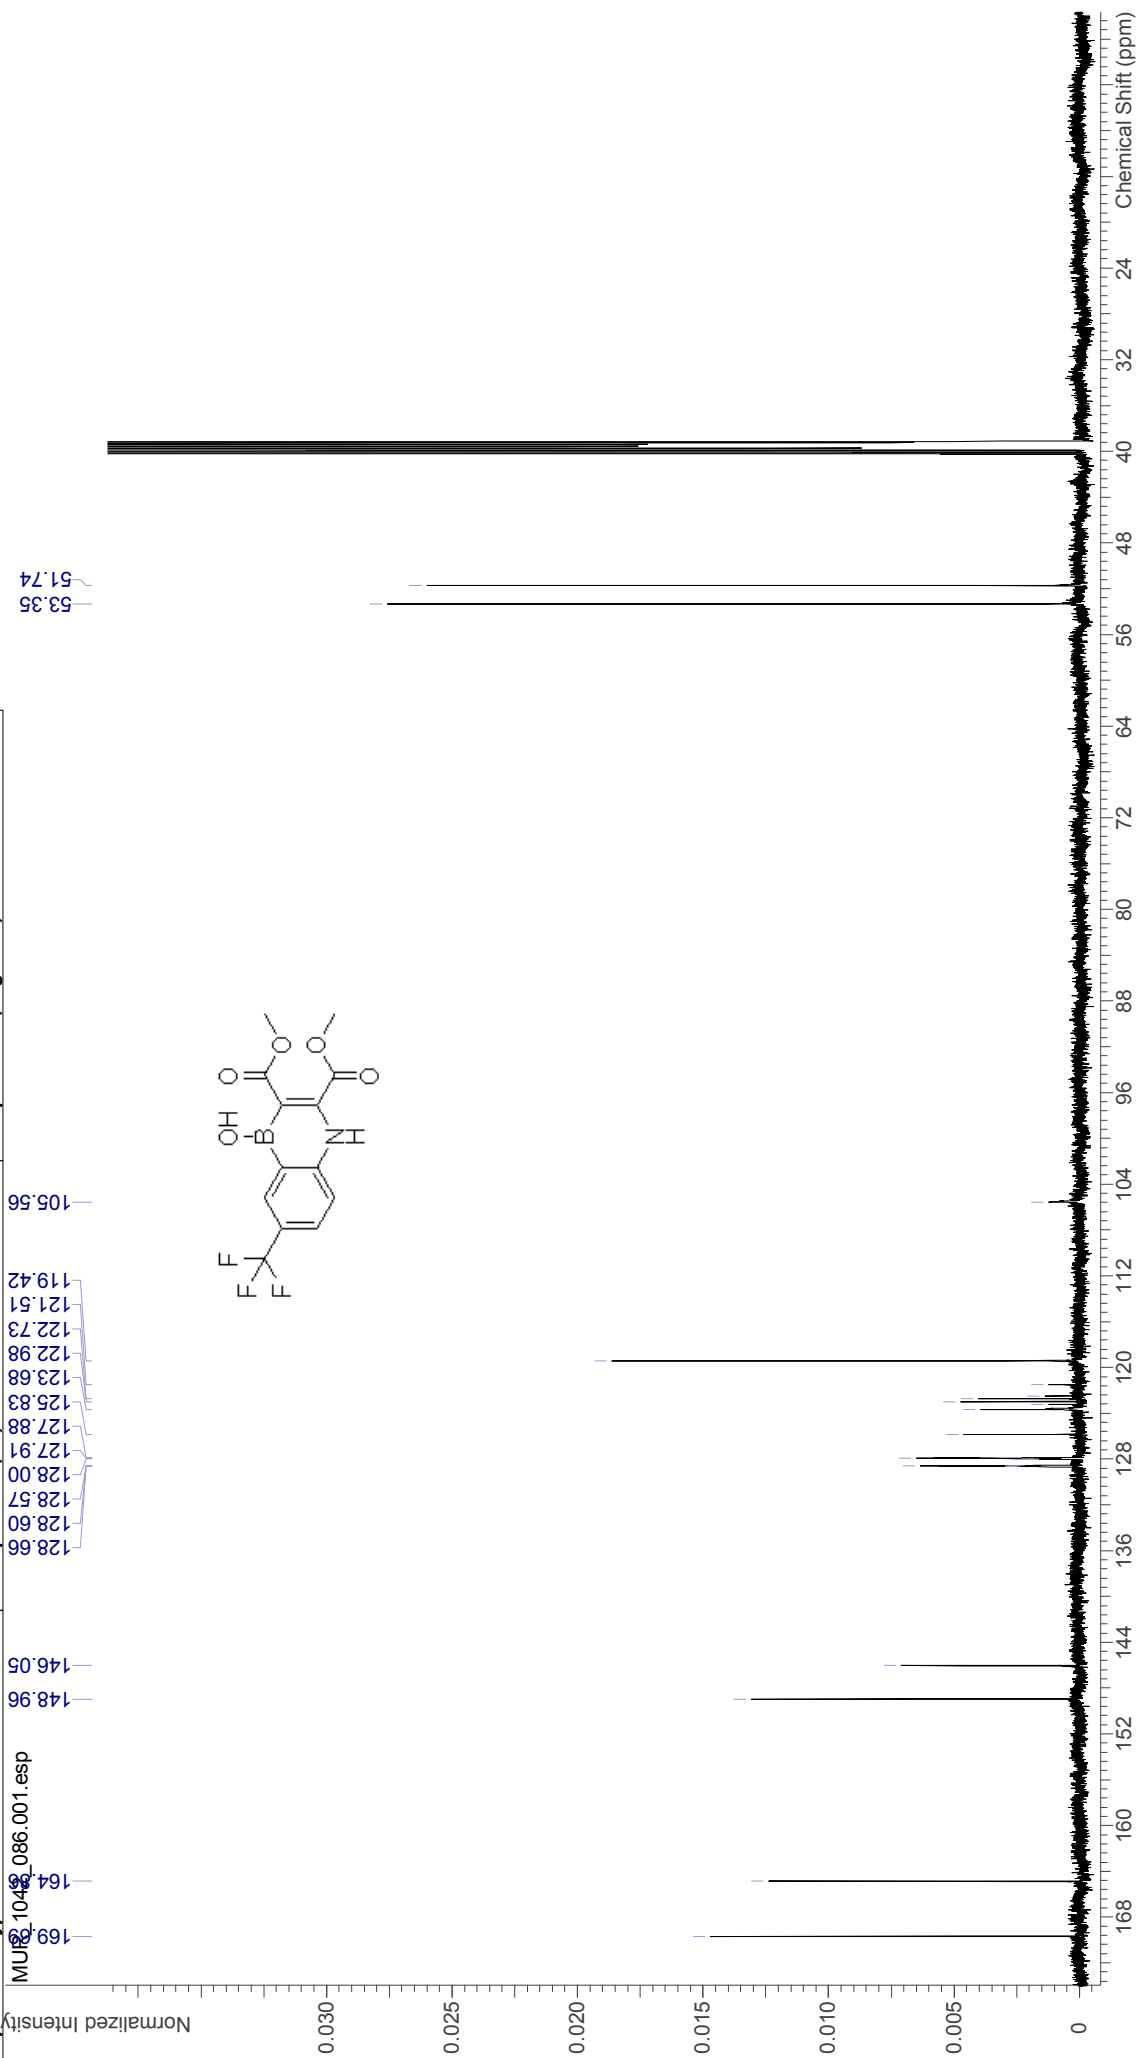

| OriginalDateForRelativeTime |                      | 2014-03-28T21:35:04 |               | MUR_1042_086B     |                                                                  | Multiplets Integrals Sum |                      | 0.00                 |        | Number of Nuclei       |        | 1 B's          |    |
|-----------------------------|----------------------|---------------------|---------------|-------------------|------------------------------------------------------------------|--------------------------|----------------------|----------------------|--------|------------------------|--------|----------------|----|
| Acquisition Time (sec)      | 1.7007               | Comment             | MUR_1042_086B | File Name         | \\inbglab176164\ecm_2014\MUR\data\MED\mmr\MUR_1046_0861\pdata11r | Date                     | 28 Mar 2014 21:35:04 | Number of Transients | 2000   | Origin                 | av300  | Pulse Sequence | zg |
| Date Stamp                  | 28 Mar 2014 21:35:04 | Nucleus             | 11B           | Points Count      | 32768                                                            | Solvent                  | DMSO-d6              | Spectrum Offset (Hz) | 0.1709 | Temperature (degree C) | 25.000 |                |    |
| Frequency (MHz)             | 96.29                | Owner               | administrator | SW(cyclical) (Hz) | 19267.82                                                         | Sweep Width (Hz)         | 19267.23             |                      |        |                        |        |                |    |
| Original Points Count       | 32768                |                     |               |                   |                                                                  |                          |                      |                      |        |                        |        |                |    |
| Receiver Gain               | 3649.10              |                     |               |                   |                                                                  |                          |                      |                      |        |                        |        |                |    |
| Spectrum Type               | STANDARD             |                     |               |                   |                                                                  |                          |                      |                      |        |                        |        |                |    |

MUR\_1046\_086.001.001.1r.esp

VerticalScaleFactor = 1

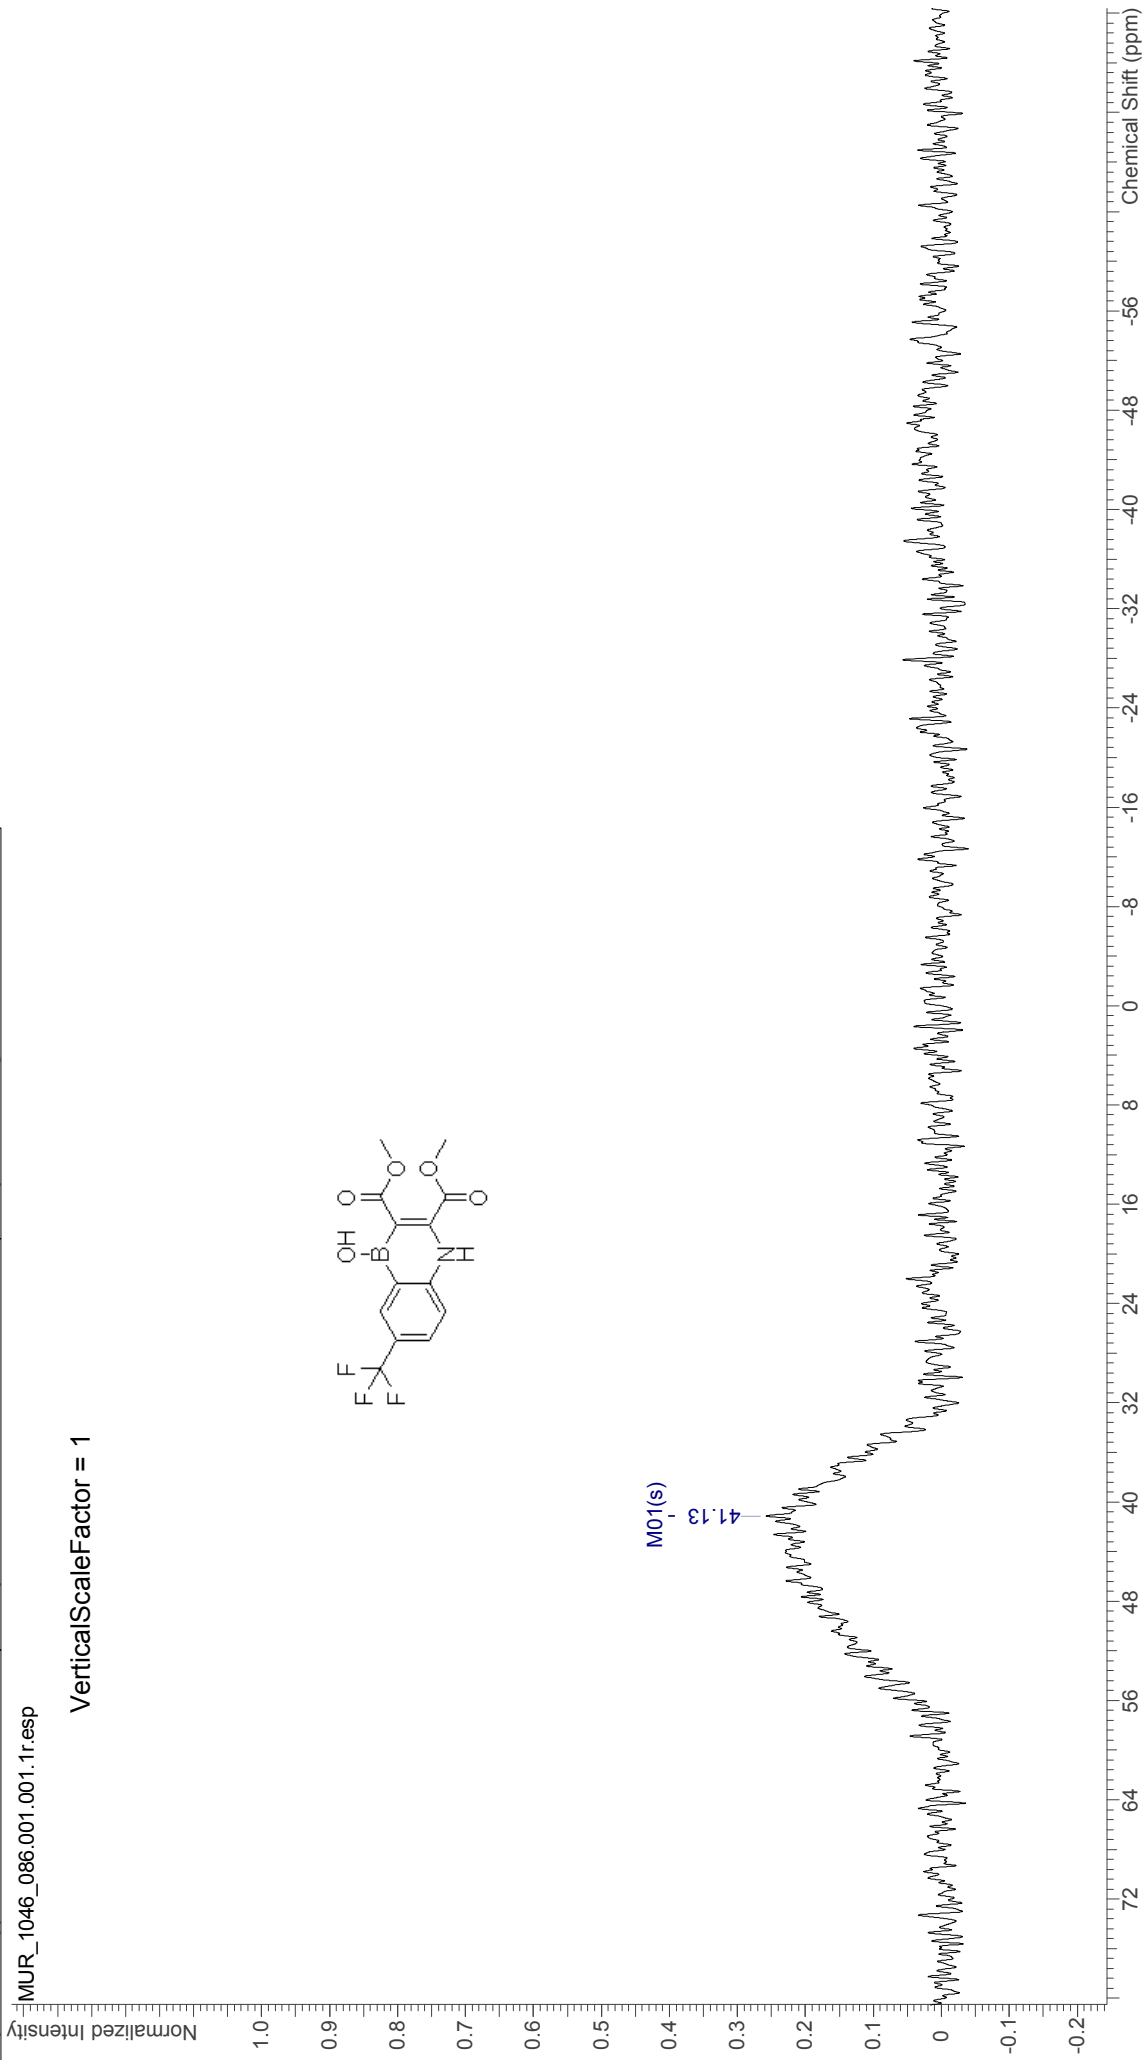

|                                    |                        |                                 |                                                            |                         |        |
|------------------------------------|------------------------|---------------------------------|------------------------------------------------------------|-------------------------|--------|
| <b>OriginalDateForRelativeTime</b> | 2014-04-05T17:02:00    | <b>Multiplets Integrals Sum</b> | 16.25                                                      | <b>Number of Nuclei</b> | 16 H's |
| <b>Acquisition Time (sec)</b>      | 3.1719                 | <b>Comment</b>                  | PROTON DMSO (F:\ecm\DATA\2014-04\} bionmr 7                |                         |        |
| <b>Date Stamp</b>                  | 05 Apr 2014 17:02:00   | <b>File Name</b>                | \\inbgdrsf01\ELN\data\MUR\MURUGAN-CARBONMUR_05311\data\11r |                         |        |
| <b>Frequency (MHz)</b>             | 500.13                 | <b>Nucleus</b>                  | 1H                                                         |                         |        |
| <b>Original Points Count</b>       | 32768                  | <b>Owner</b>                    | administrator                                              |                         |        |
| <b>Receiver Gain</b>               | 4.00                   | <b>SW(cyclical) (Hz)</b>        | 10330.58                                                   |                         |        |
| <b>Spectrum Type</b>               | STANDARD               | <b>Sweep Width (Hz)</b>         | 10330.26                                                   |                         |        |
|                                    | MUR_053.001.001.1r.esp | <b>Temperature (degree C)</b>   | 25.000                                                     |                         |        |
|                                    |                        | <b>Solvent</b>                  | DMSO-d6                                                    |                         |        |
|                                    |                        | <b>Points Count</b>             | 32768                                                      |                         |        |
|                                    |                        | <b>Number of Transients</b>     | 16                                                         |                         |        |
|                                    |                        | <b>Origin</b>                   | spect                                                      |                         |        |
|                                    |                        | <b>Pulse Sequence</b>           | zg30                                                       |                         |        |
|                                    |                        | <b>Spectrum Offset (Hz)</b>     | 3658.7937                                                  |                         |        |

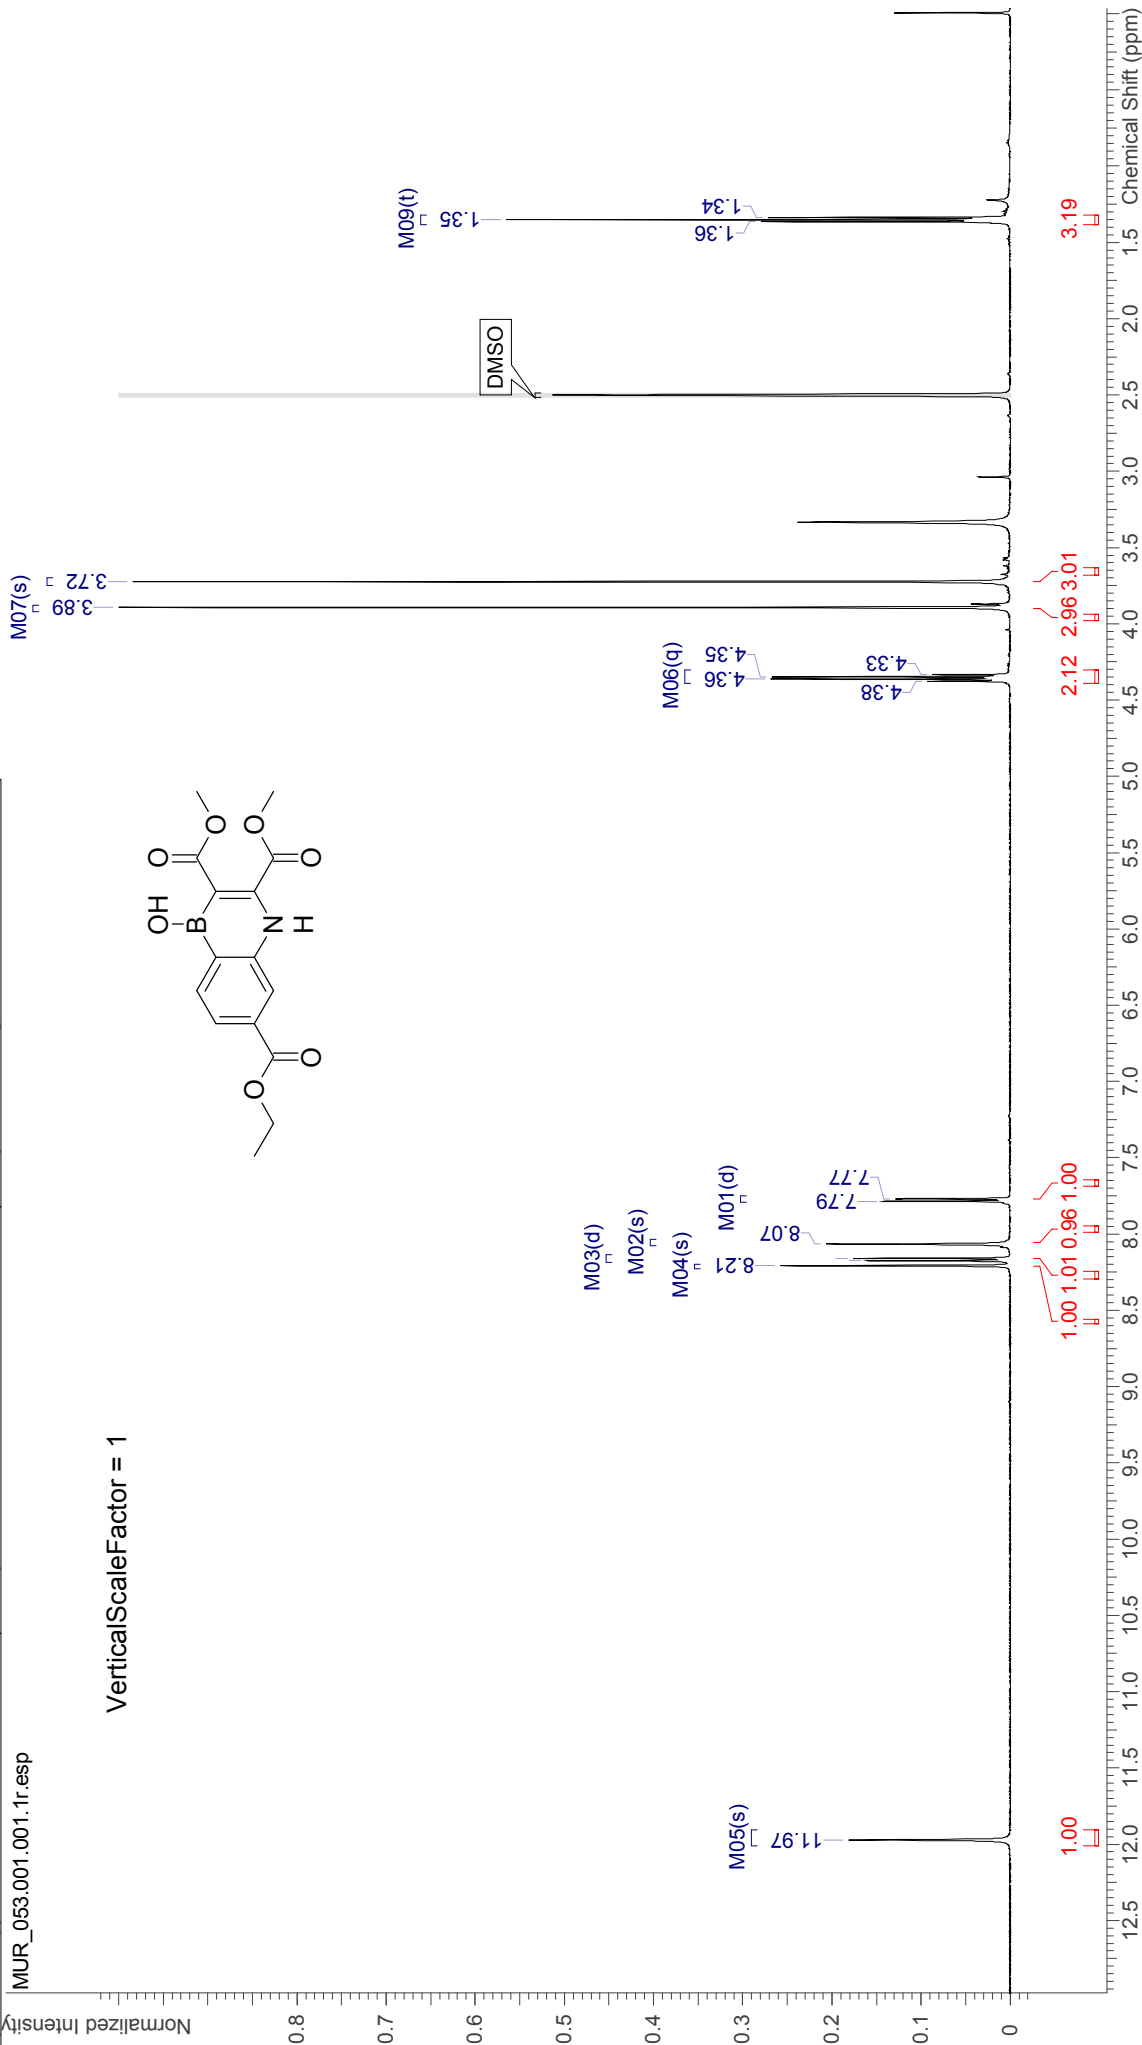

|                                    |                      |                                 |                                                              |                               |         |
|------------------------------------|----------------------|---------------------------------|--------------------------------------------------------------|-------------------------------|---------|
| <b>OriginalDateForRelativeTime</b> | 2014-04-06T00:06:32  | <b>Multiplets Integrals Sum</b> | 0.00                                                         | <b>Number of Nuclei</b>       | 0 C's   |
| <b>Acquisition Time (sec)</b>      | 1.0912               | <b>Comment</b>                  | C-13CPD DMSO (F:\ecm\DATA\2014-04\} bionmr 7                 |                               |         |
| <b>Date Stamp</b>                  | 06 Apr 2014 00:06:32 | <b>File Name</b>                | \\inbgrdsfp01\ELN\data\MUR\MURUGAN-CARBON\MUR_05316\data1\1r |                               |         |
| <b>Frequency (MHz)</b>             | 125.77               | <b>Nucleus</b>                  | 13C                                                          | <b>Origin</b>                 | spect   |
| <b>Original Points Count</b>       | 32768                | <b>Owner</b>                    | administrator                                                | <b>Pulse Sequence</b>         | z9pg30  |
| <b>Receiver Gain</b>               | 32768.00             | <b>SW(cyclical) (Hz)</b>        | 30030.03                                                     | <b>Solvent</b>                | DMSO-d6 |
| <b>Spectrum Type</b>               | STANDARD             | <b>Sweep Width (Hz)</b>         | 30029.11                                                     | <b>Temperature (degree C)</b> | 25.000  |
| <b>VerticalScaleFactor</b>         |                      | = 1                             |                                                              |                               |         |

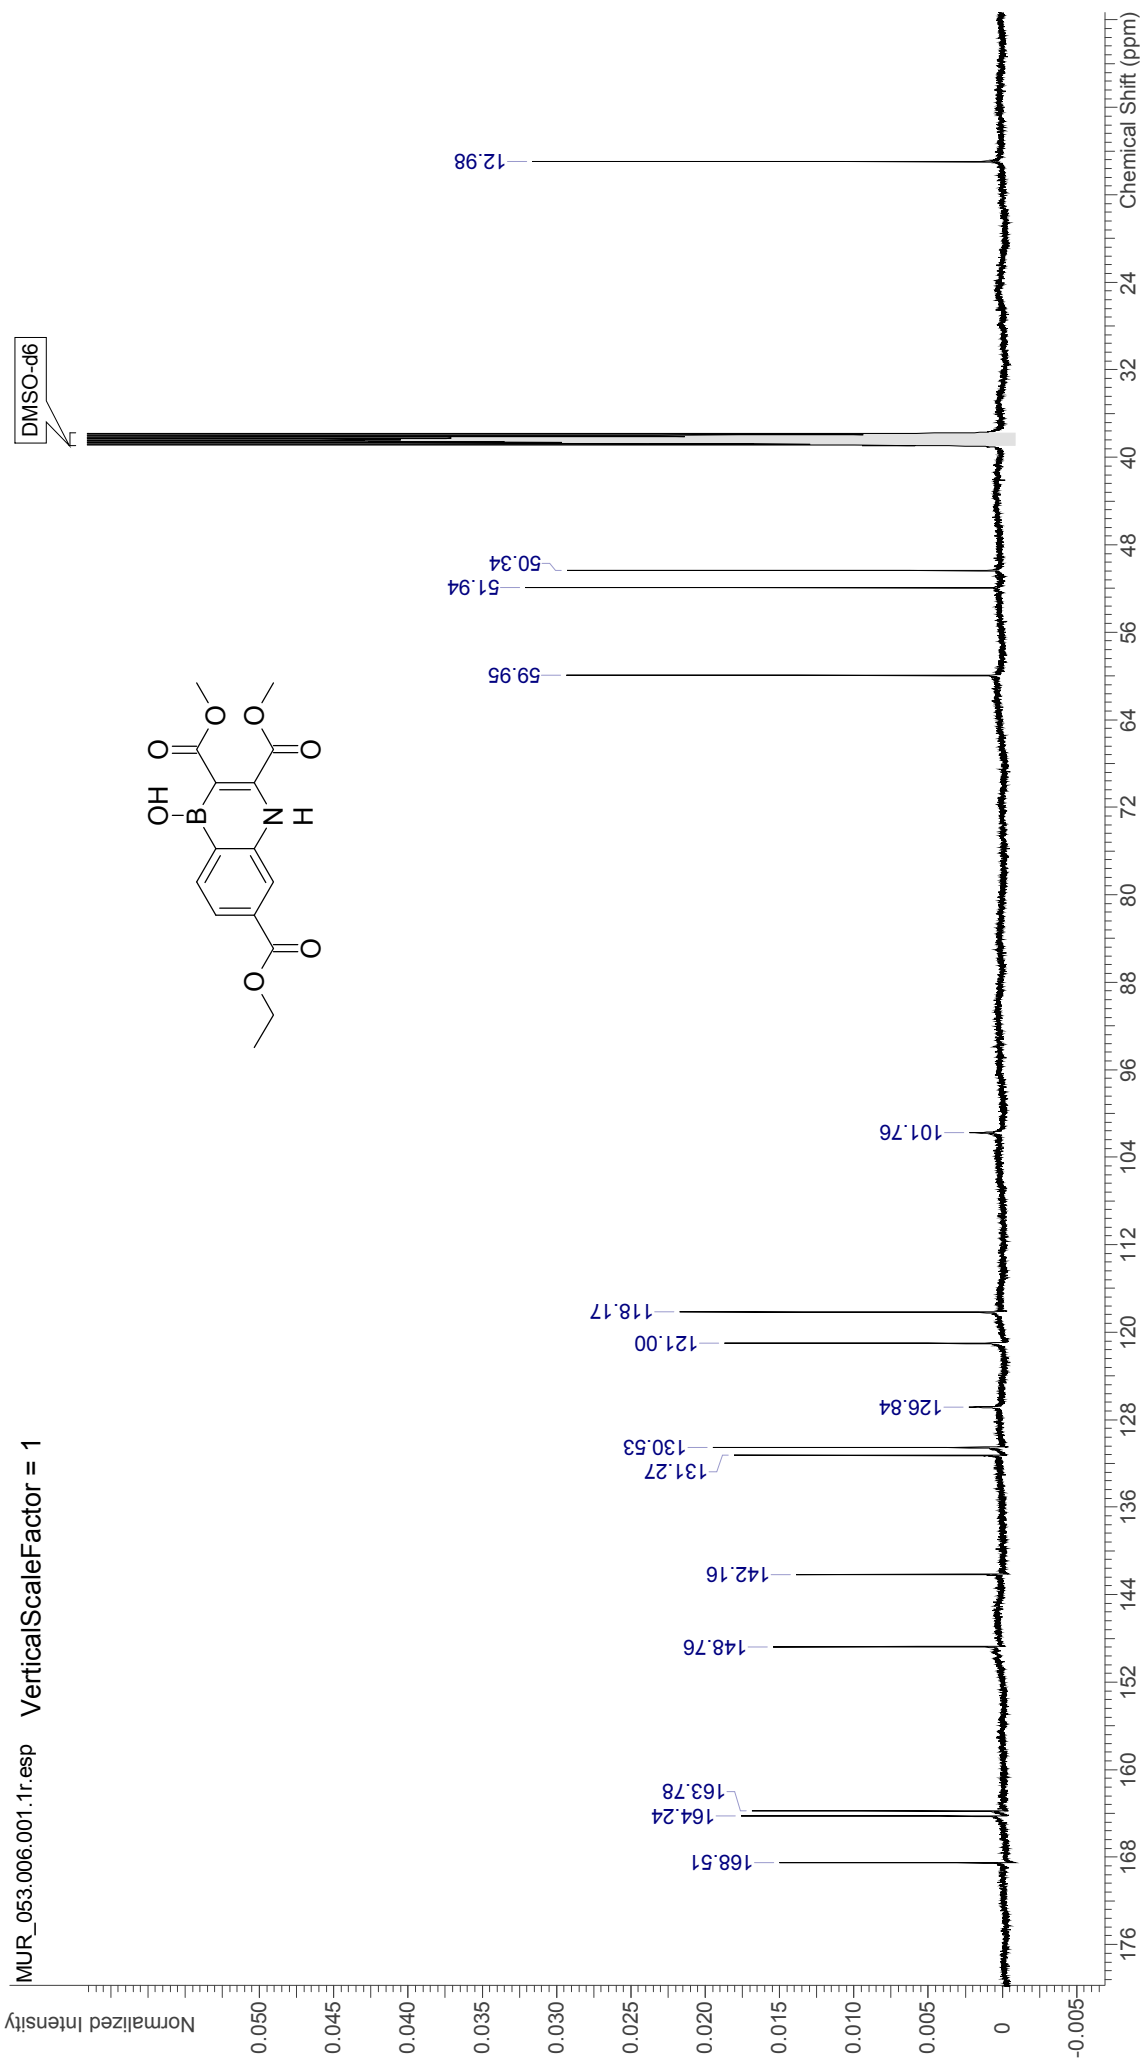



|                                                 |                      |                               |                                                                   |                        |                      |
|-------------------------------------------------|----------------------|-------------------------------|-------------------------------------------------------------------|------------------------|----------------------|
| OriginalDateForRelativeTime 2014-05-13T16:23:36 |                      | Multiplets Integrals Sum 0.00 |                                                                   | Number of Nuclei 1 B's |                      |
| Acquisition Time (Sec)                          | 0.8503               | Comment                       | MUR-BORON-3                                                       | Date                   | 13 May 2014 16:23:36 |
| Date Stamp                                      | 13 May 2014 16:23:36 | File Name                     | \\inbglab176164\ecm 2014\MUR\data\MED\mnr\MUR-BORON-3\1\data\111r | Origin                 | av300                |
| Frequency (MHz)                                 | 96.29                | Nucleus                       | 11B                                                               | Receiver Gain          | 5160.60              |
| Owner                                           | administrator        | Points Count                  | 32768                                                             | SW(cyclical) (Hz)      | 38535.64             |
| Solvent                                         | DMSO-d6              | Spectrum Offset (Hz)          | 0.0038                                                            | Sweep Width (Hz)       | 38534.47             |
|                                                 |                      | Spectrum Type                 | STANDARD                                                          | Temperature (degree C) | 25.000               |

VerticalScaleFactor = 1

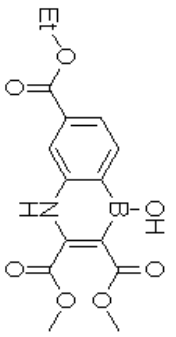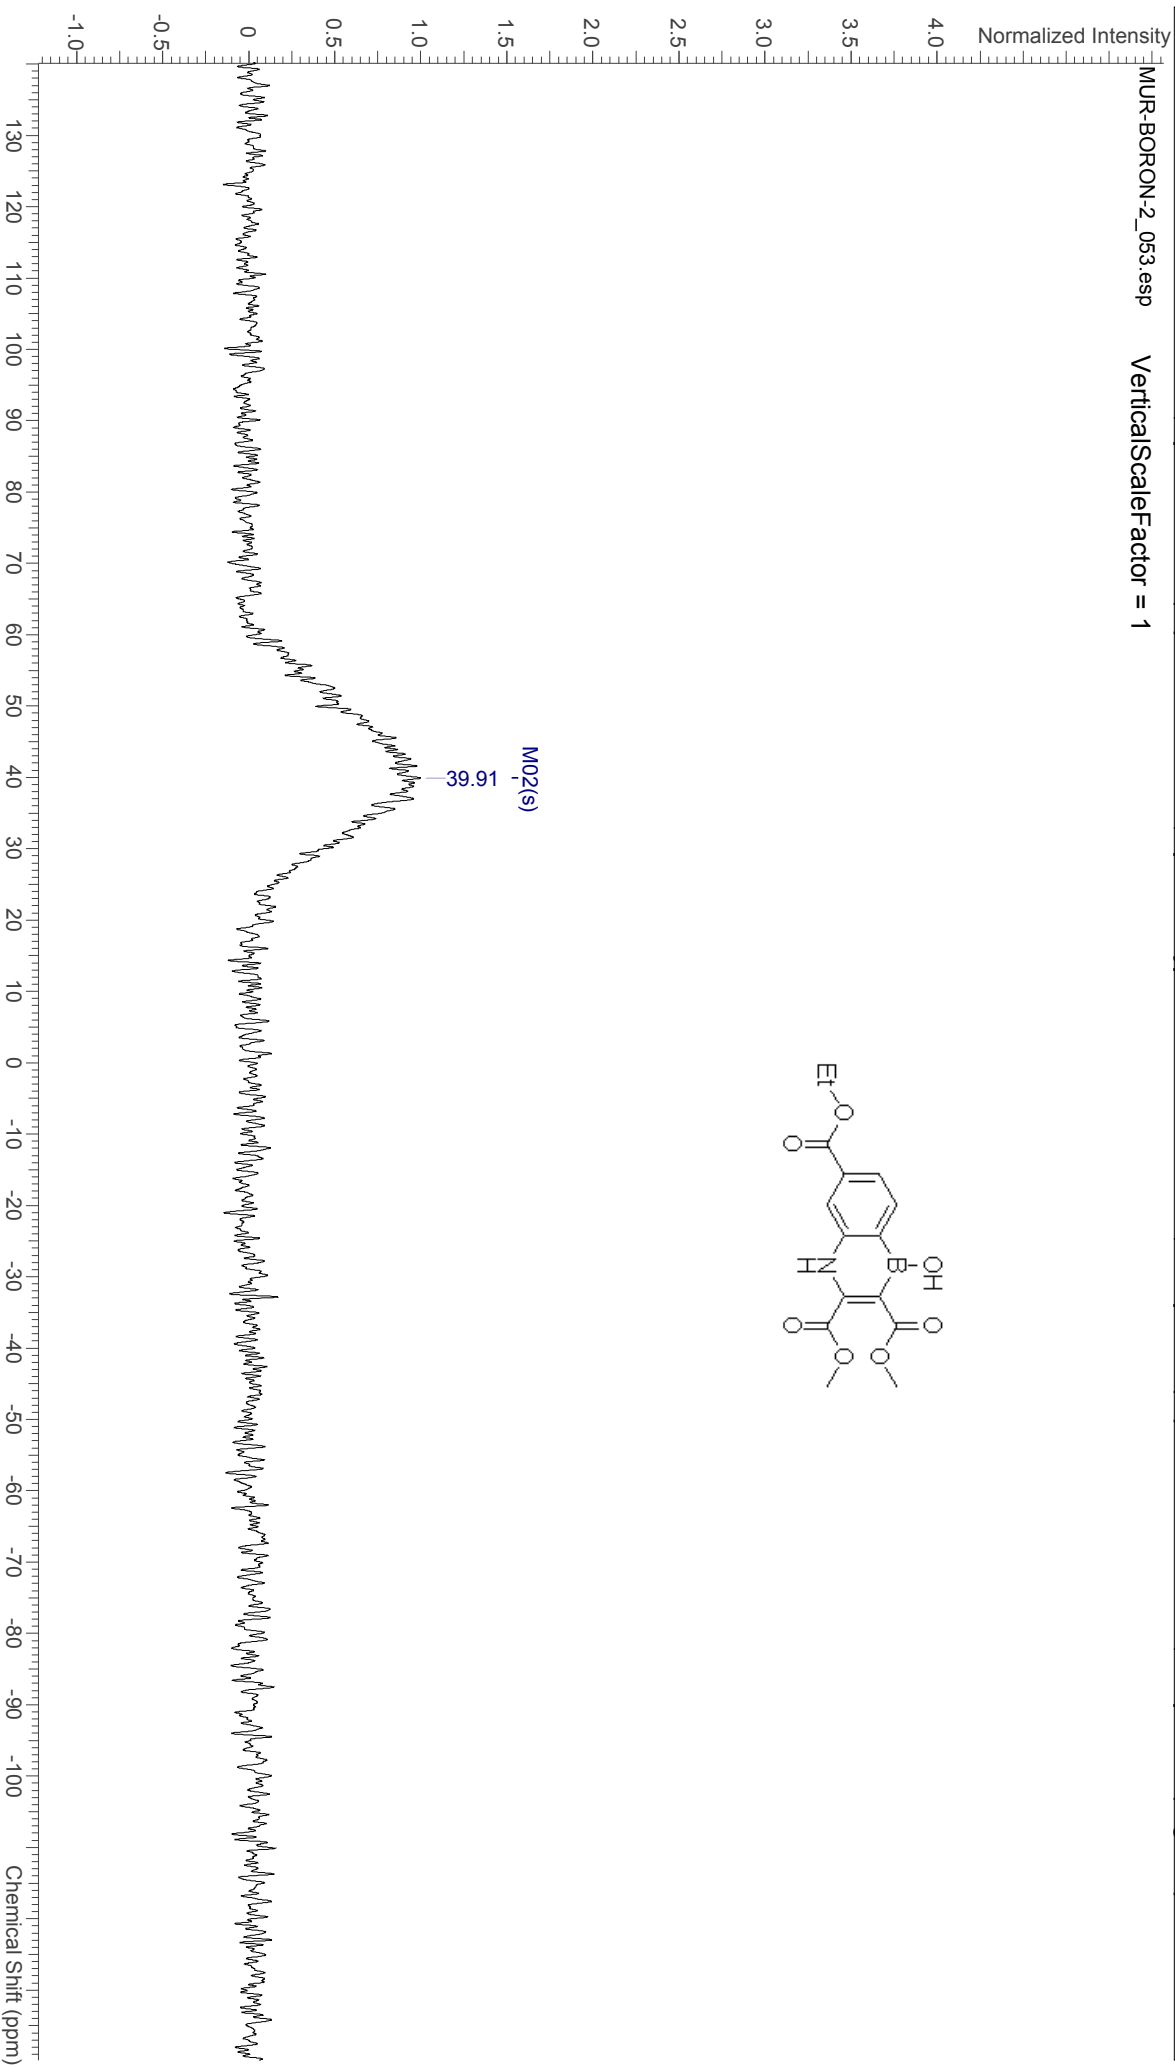

|                                                        |                                                                                    |                                       |                                      |                                       |  |
|--------------------------------------------------------|------------------------------------------------------------------------------------|---------------------------------------|--------------------------------------|---------------------------------------|--|
| <b>OriginalDateForRelativeTime</b> 2014-02-15T15:23:52 |                                                                                    | <b>Multiplets Integrals Sum</b> 13.96 |                                      | <b>Number of Nuclei</b> 14 H's        |  |
| <b>Acquisition Time (sec)</b> 5.3084                   | <b>Comment</b> MUR_1042_039,dms0                                                   | <b>Date</b> 15 Feb 2014 15:23:52      |                                      |                                       |  |
| <b>Date Stamp</b> 15 Feb 2014 15:23:52                 | <b>File Name</b> \\inbglab176164\ecm_2014\MUR\data\med\nmr\MUR_1042_039\1\data111r | <b>Origin</b> av300                   |                                      |                                       |  |
| <b>Frequency (MHz)</b> 300.13                          | <b>Nucleus</b> 1H                                                                  | <b>Number of Transients</b> 128       | <b>Pulse Sequence</b> zg30           |                                       |  |
| <b>Original Points Count</b> 32768                     | <b>Owner</b> administrator                                                         | <b>Points Count</b> 32768             | <b>Solvent</b> DMSO-d6               | <b>Spectrum Offset (Hz)</b> 1853.4775 |  |
| <b>Receiver Gain</b> 1625.50                           | <b>SW(cyclical) (Hz)</b> 6172.84                                                   | <b>Solvent</b> DMSO-d6                | <b>Temperature (degree C)</b> 25.000 |                                       |  |
| <b>Spectrum Type</b> STANDARD                          | <b>Sweep Width (Hz)</b> 6172.65                                                    |                                       |                                      |                                       |  |

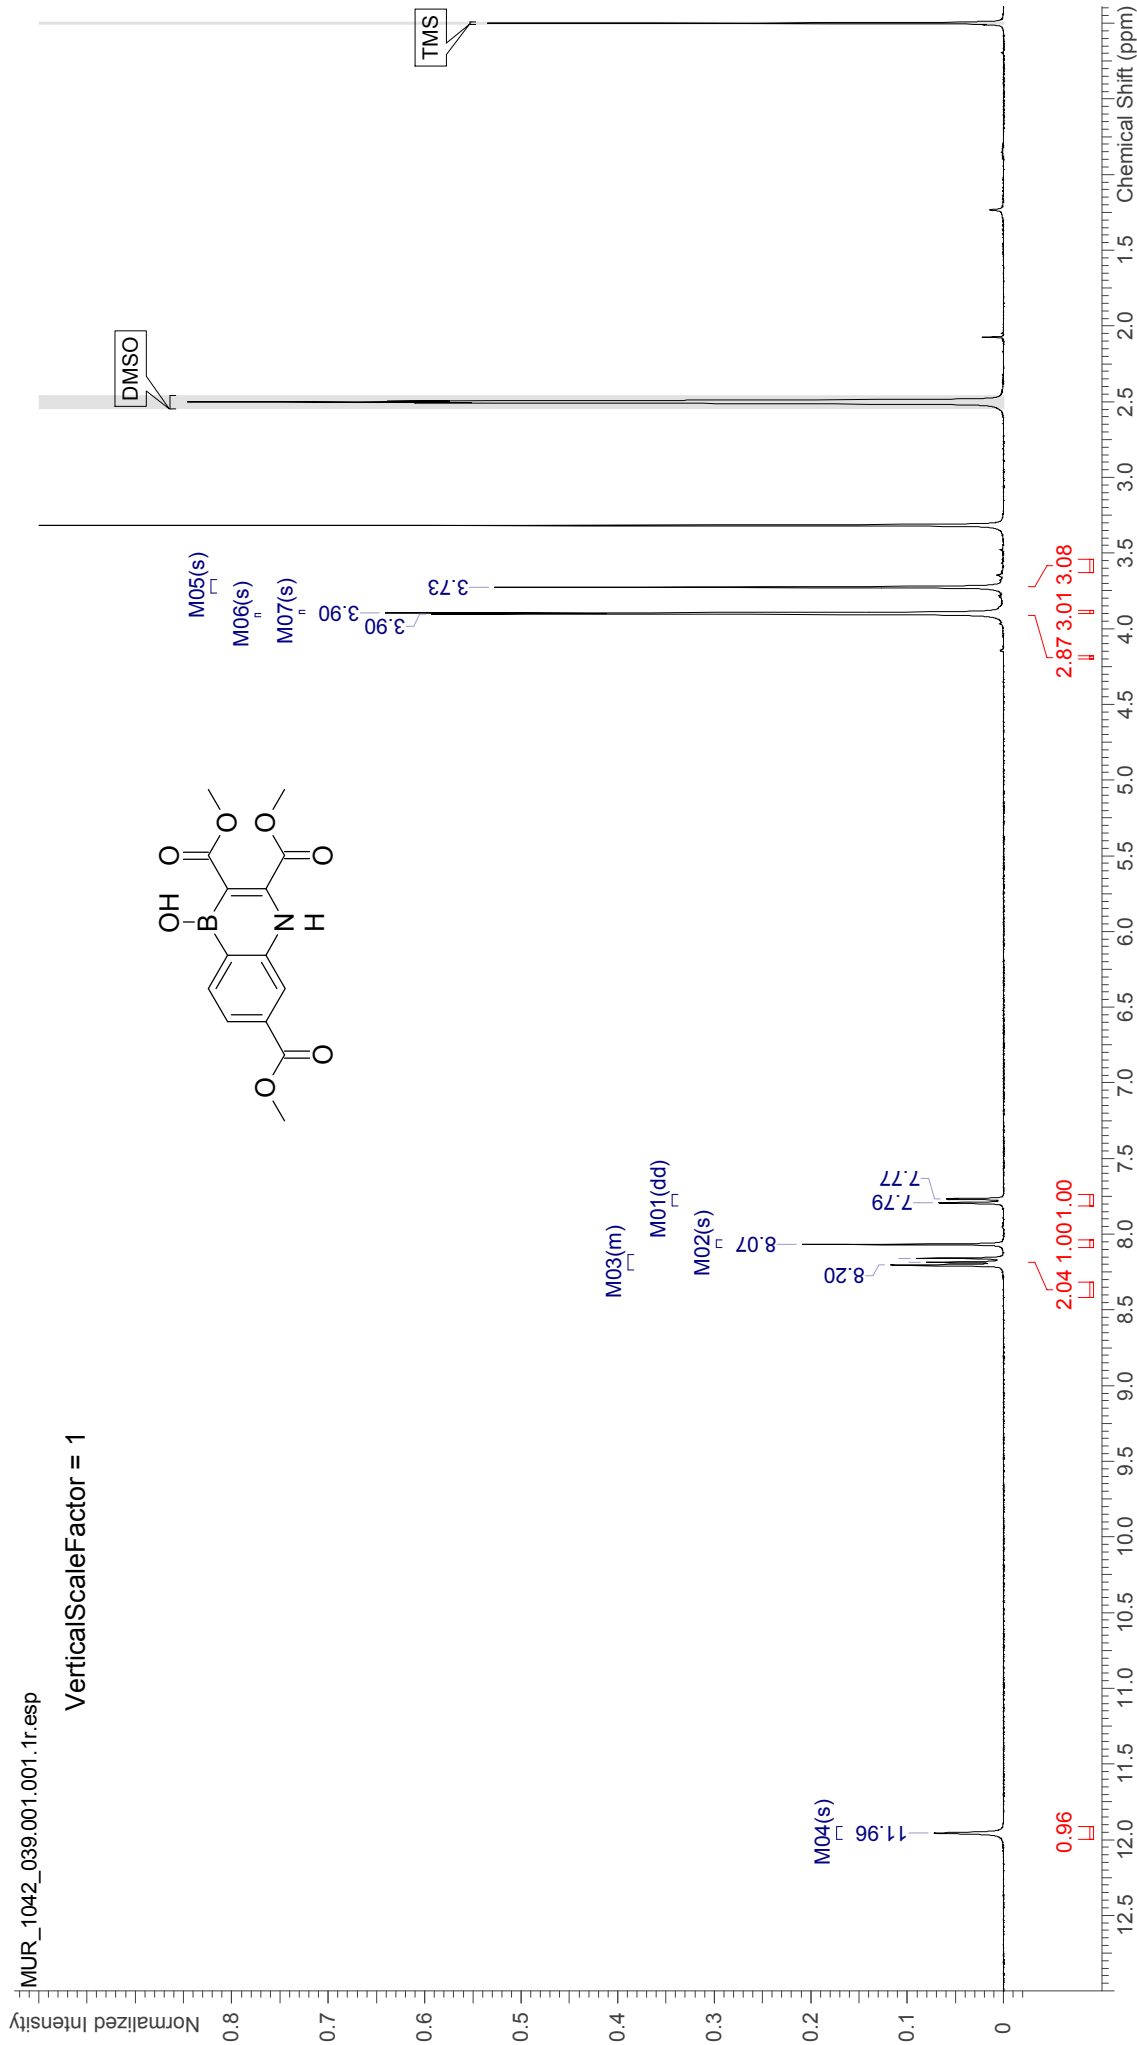

| OriginalDateForRelativeTime | 2014-03-01T07:32:24                                   | Multiplets Integrals Sum | 0.00                                                   | Number of Nuclei  | 0 C's         |
|-----------------------------|-------------------------------------------------------|--------------------------|--------------------------------------------------------|-------------------|---------------|
| Acquisition Time (sec)      | 1.0912                                                | Comment                  | MUR_1042_39 C:13CPD DMSO {F:\ecm\DATA\2014-2} bionmr 4 |                   |               |
| Date                        | 01 Mar 2014 07:32:24                                  | Date Stamp               | 01 Mar 2014 07:32:24                                   | Nucleus           | 13C           |
| File Name                   | C:\Users\kvjk299\Desktop\C:13MUR_1042_39\1\pdata\1\1r | Frequency (MHz)          | 125.77                                                 | Owner             | administrator |
| Number of Transients        | 8192                                                  | Original Points Count    | 32768                                                  | SW(cyclical) (Hz) | 30030.03      |
| Points Count                | 32768                                                 | Pulse Sequence           | z9pg30                                                 | Spectrum Type     | STANDARD      |
| Solvent                     | DMSO-d6                                               | Spectrum Offset (Hz)     | 12506.5469                                             | Sweep Width (Hz)  | 30029.11      |
| Temperature (degree C)      | 25.000                                                |                          |                                                        |                   |               |

MUR\_1042\_39.001.001.1r.es VerticalScaleFactor = 1

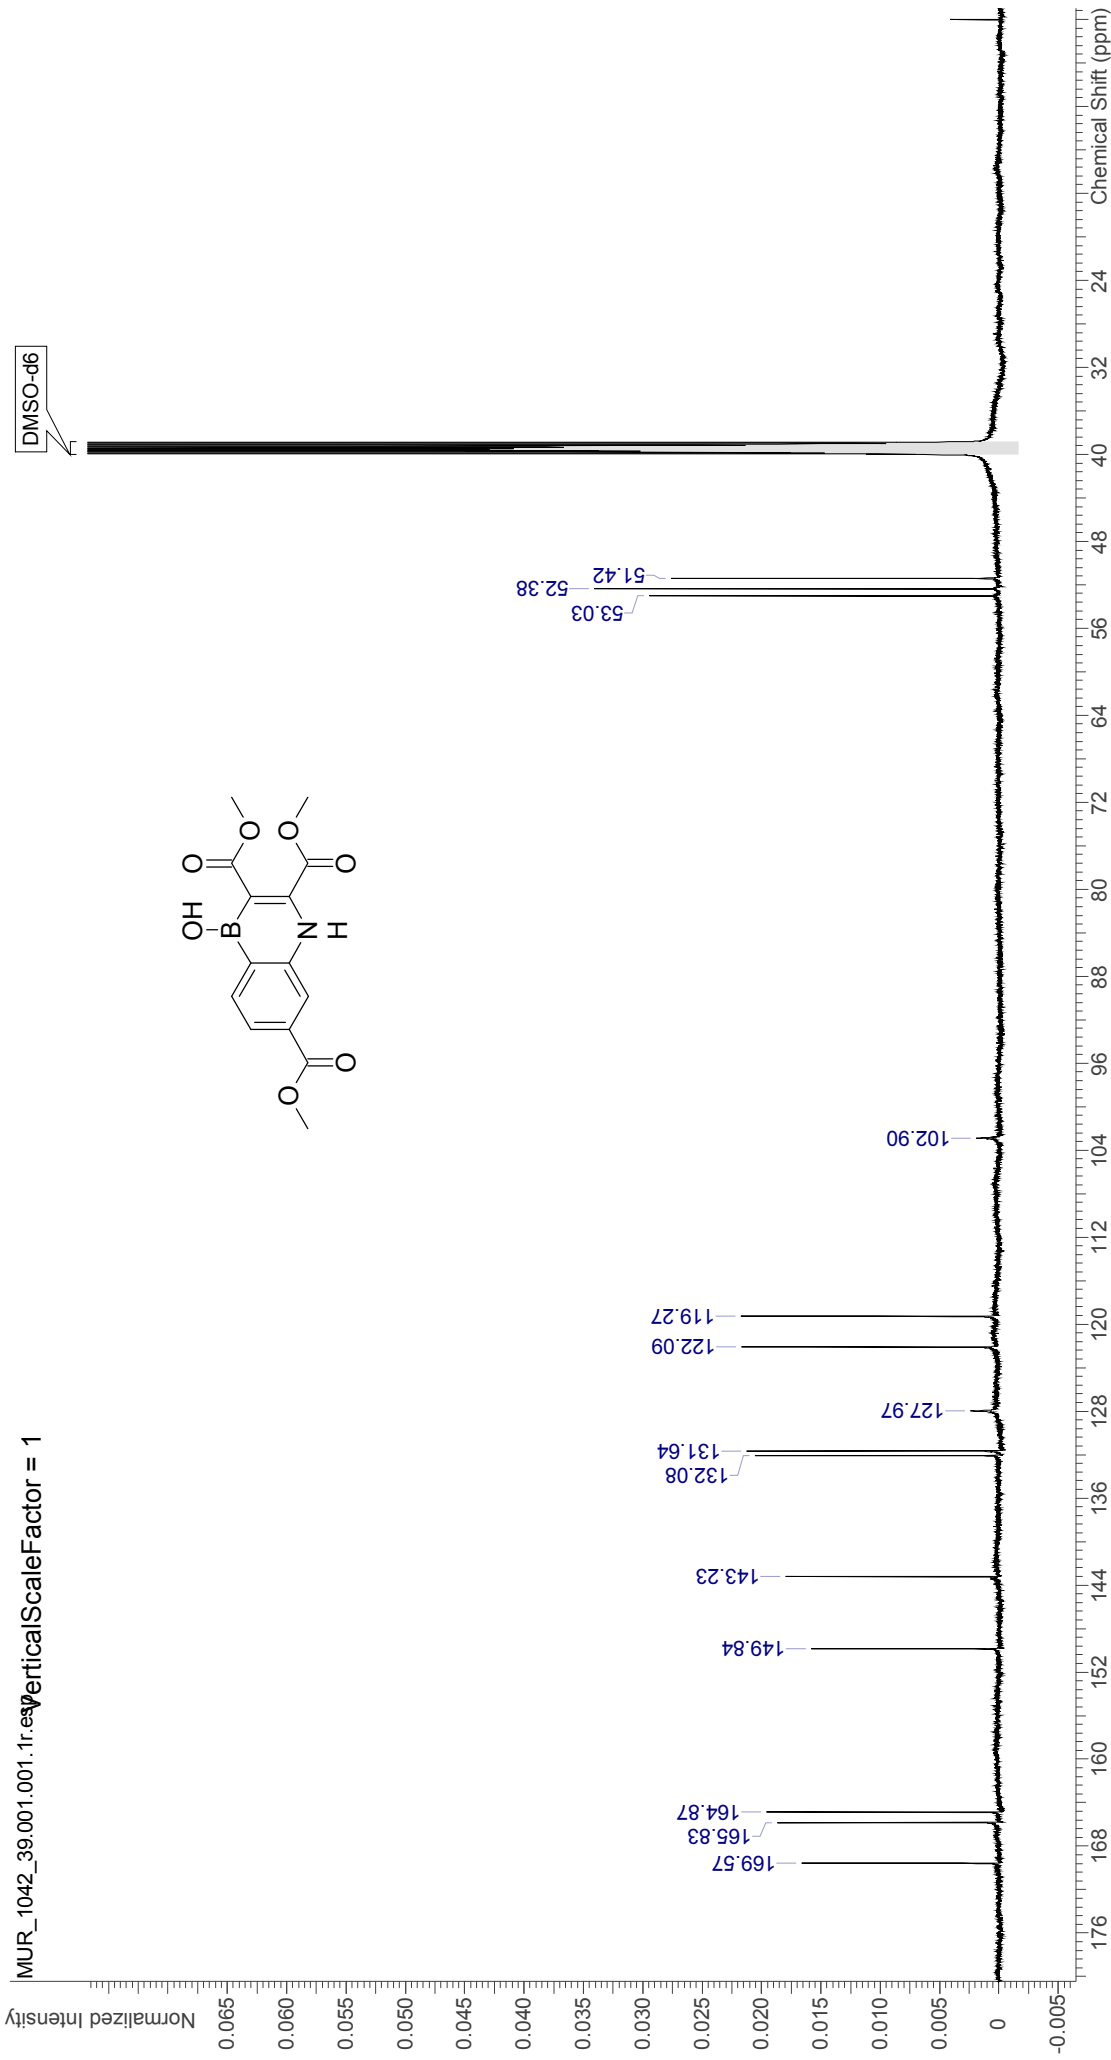

| OriginalDateForRelativeTime |                      | 2014-05-13T11:01:28  |             | MUR-BORON-1          |                                                                   | Multiplets Integrals Sum |                      | 0.00                 |          | Number of Nuclei |          | 1 B's                  |          |
|-----------------------------|----------------------|----------------------|-------------|----------------------|-------------------------------------------------------------------|--------------------------|----------------------|----------------------|----------|------------------|----------|------------------------|----------|
| Acquisition Time (sec)      | 0.8503               | Comment              | MUR-BORON-1 | File Name            | \\inbglab176164\ecm_2014\MUR\data\IMED\vmr\MUR-BORON-1\1\data\11r | Date                     | 13 May 2014 11:01:28 | Number of Transients | 1024     | Origin           | av300    | Original Points Count  | 32768    |
| Date Stamp                  | 13 May 2014 11:01:28 | Nucleus              | 11B         | Number of Transients | 1024                                                              | Origin                   | av300                | Pulse Sequence       | zg       | Receiver Gain    | 5160.60  | SW(cyclical) (Hz)      | 38535.64 |
| Frequency (MHz)             | 96.29                | Points Count         | 32768       | Spectrum Type        | STANDARD                                                          | Sweep Width (Hz)         | 38534.47             | Spectrum Type        | STANDARD | Sweep Width (Hz) | 38534.47 | Temperature (degree C) | 25.000   |
| Owner                       | administrator        | Spectrum Offset (Hz) | 0.0038      |                      |                                                                   |                          |                      |                      |          |                  |          |                        |          |
| Solvent                     | DMSO-d6              |                      |             |                      |                                                                   |                          |                      |                      |          |                  |          |                        |          |

MUR-BORON-1.001.001.1r.esq VerticalScaleFactor = 1

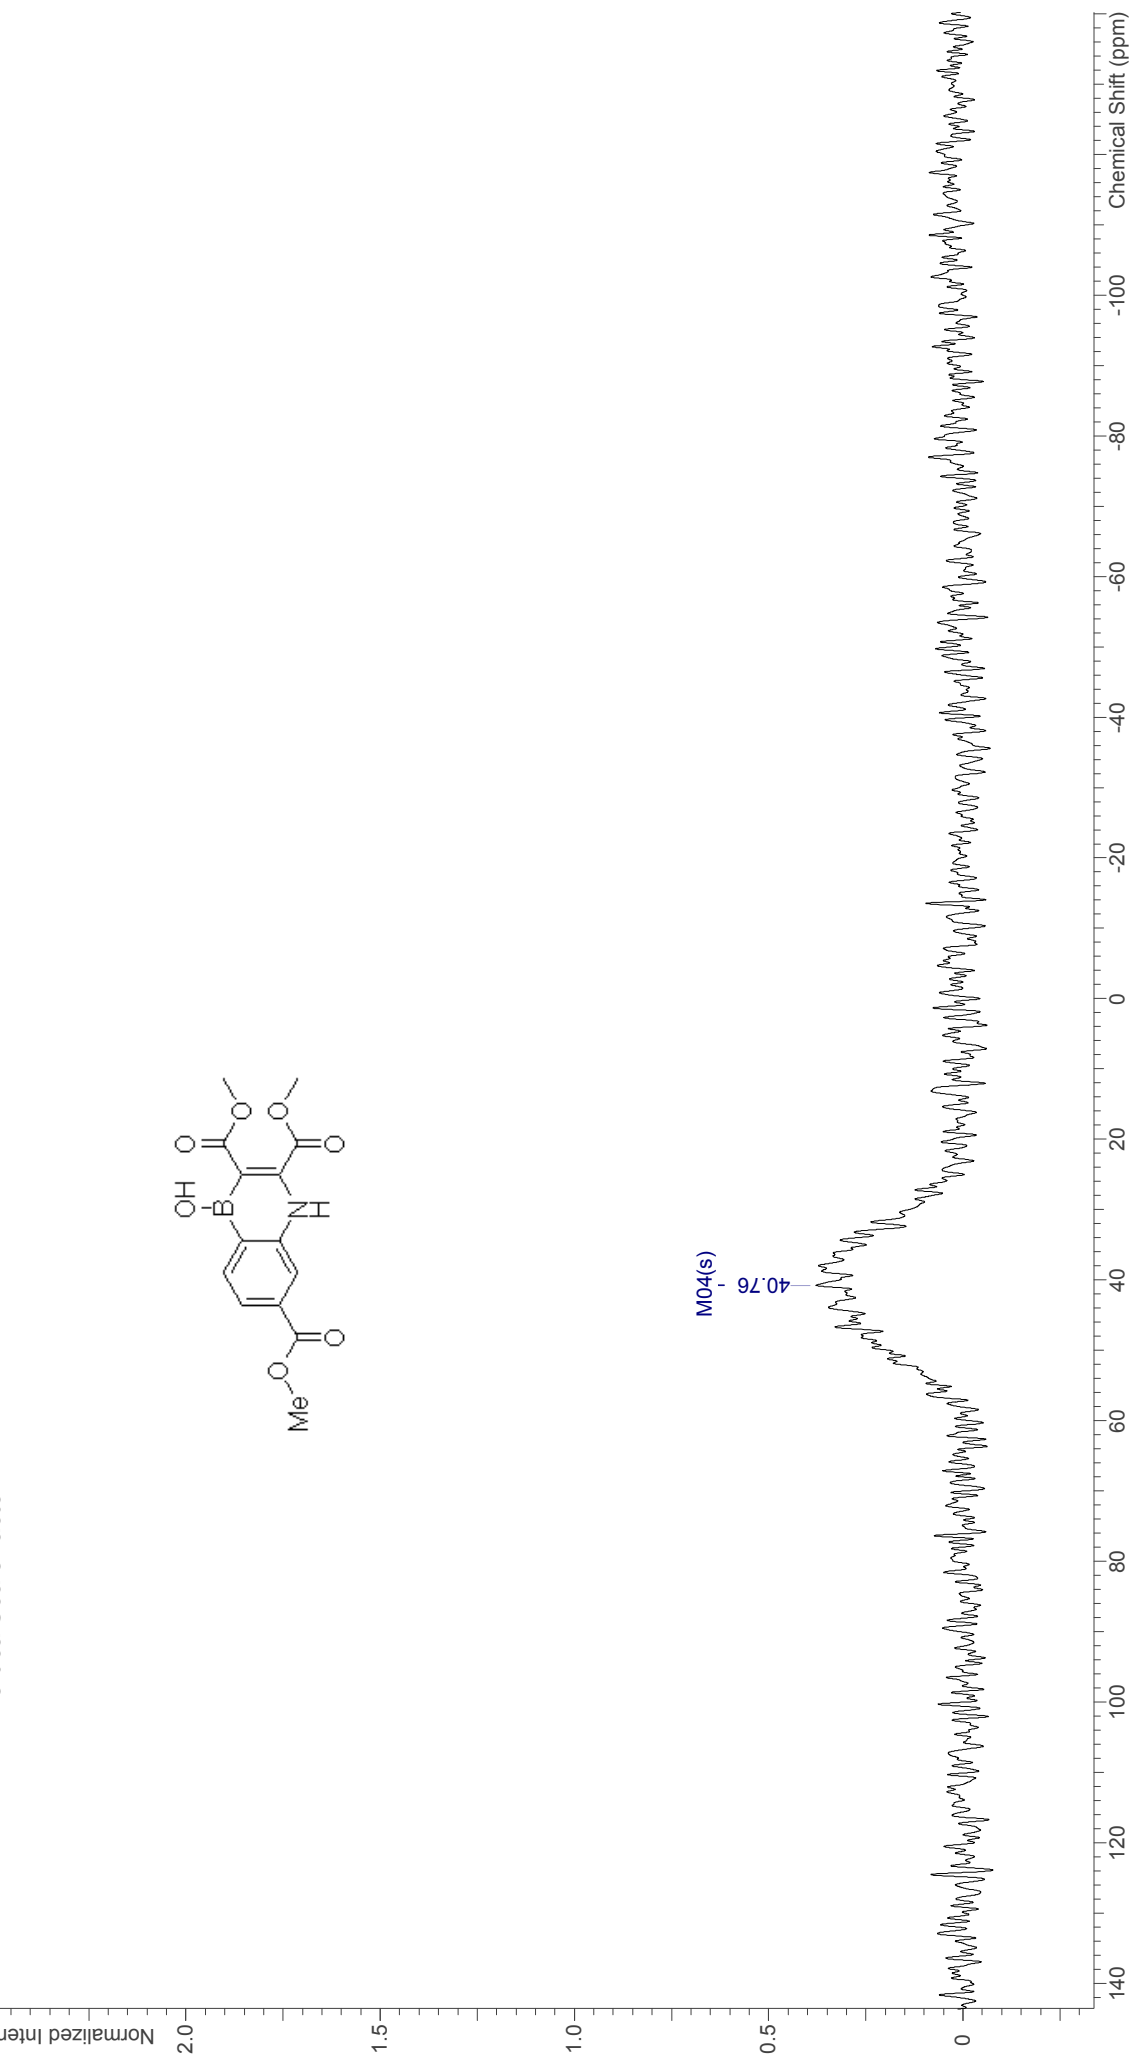

|                                                        |                                                                                    |                                       |                                       |                                |  |
|--------------------------------------------------------|------------------------------------------------------------------------------------|---------------------------------------|---------------------------------------|--------------------------------|--|
| <b>OriginalDateForRelativeTime</b> 2014-03-15T15:34:32 |                                                                                    | <b>Multiplets Integrals Sum</b> 11.09 |                                       | <b>Number of Nuclei</b> 11 H's |  |
| <b>Acquisition Time (sec)</b> 5.3084                   | <b>Comment</b> mur_1042_82p                                                        | <b>Date</b> 15 Mar 2014 15:34:32      |                                       |                                |  |
| <b>Date Stamp</b> 15 Mar 2014 15:34:32                 | <b>File Name</b> \\inbglab176164\ecm_2014\MUR\data\MED\mmr\MUR_1042_82p\1\data\11r |                                       |                                       |                                |  |
| <b>Frequency (MHz)</b> 300.13                          | <b>Nucleus</b> 1H                                                                  | <b>Origin</b> av300                   |                                       |                                |  |
| <b>Original Points Count</b> 32768                     | <b>Owner</b> administrator                                                         | <b>Points Count</b> 128               | <b>Pulse Sequence</b> zg30            |                                |  |
| <b>Receiver Gain</b> 1625.50                           | <b>SW(cyclical) (Hz)</b> 6172.84                                                   | <b>Solvent</b> DMSO-d6                | <b>Spectrum Offset (Hz)</b> 1853.6069 |                                |  |
| <b>Spectrum Type</b> STANDARD                          | <b>Sweep Width (Hz)</b> 6172.65                                                    | <b>Temperature (degree C)</b> 25.000  |                                       |                                |  |

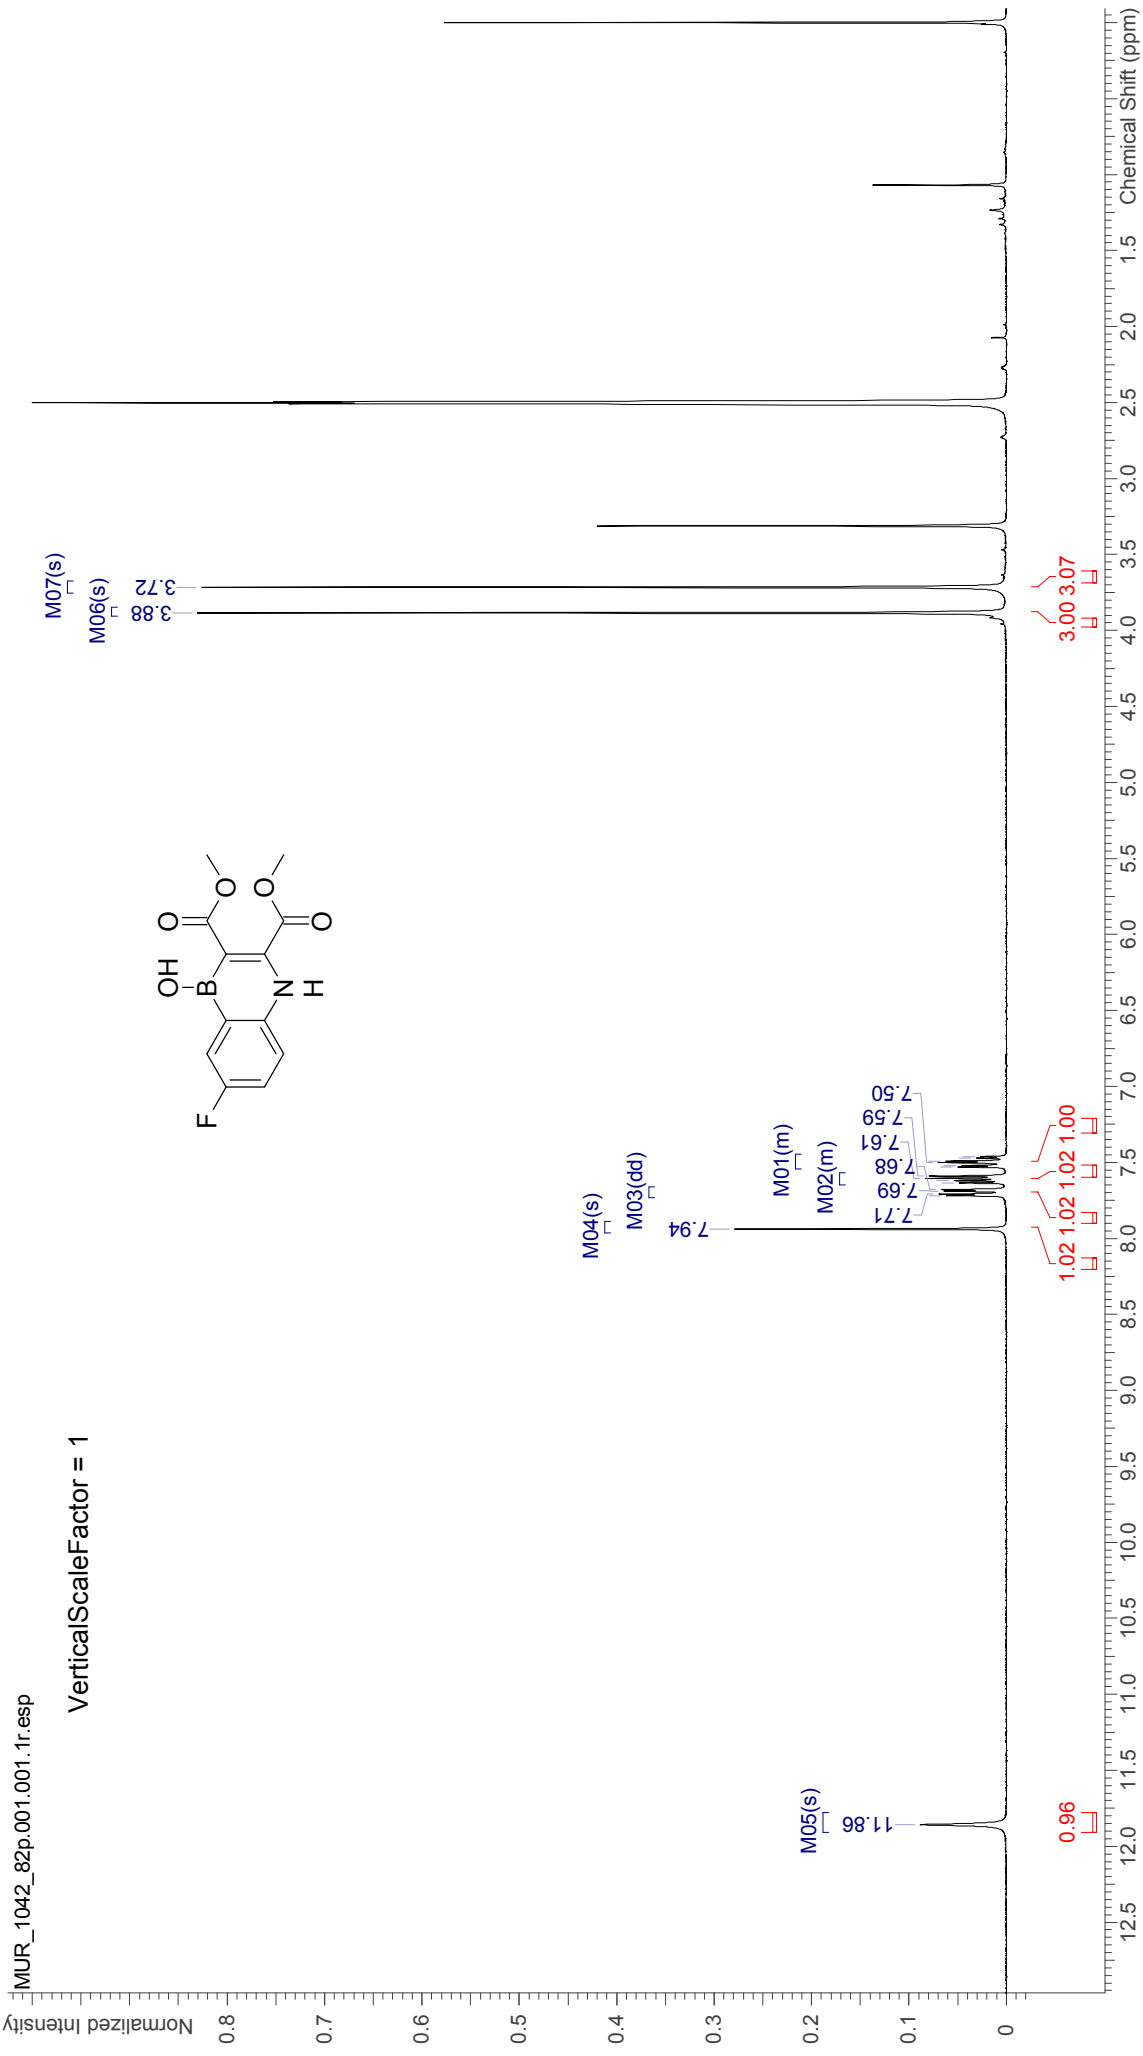

| OriginalDateForRelativeTime | 2014-04-01T04:28:56  | Multiplets Integrals Sum | 0.00                                                    | Number of Nuclei     | 0 C's                                                             |
|-----------------------------|----------------------|--------------------------|---------------------------------------------------------|----------------------|-------------------------------------------------------------------|
| Acquisition Time (sec)      | 1.0912               | Comment                  | mur_1042_82 C:13CPD DMSO (F:\ecm\DATA\2013-11} bionmr 7 | Date                 | 01 Apr 2014 04:28:56                                              |
| Date Stamp                  | 01 Apr 2014 04:28:56 | Nucleus                  | 13C                                                     | File Name            | C:\Users\kyjk299\Desktop\C13\recent c13\MUR_1042_082\1\pdata\1\1r |
| Frequency (MHz)             | 125.77               | Owner                    | administrator                                           | Number of Transients | 15000                                                             |
| Original Points Count       | 32768                | SW(cyclical) (Hz)        | 30030.03                                                | Points Count         | 32768                                                             |
| Receiver Gain               | 32768.00             | Sweep Width (Hz)         | 30029.11                                                | Solvent              | DMSO-d6                                                           |
| Spectrum Type               | STANDARD             | Temperature (degree C)   | 25.000                                                  | Pulse Sequence       | zpg930                                                            |
|                             |                      |                          |                                                         | Spectrum Offset (Hz) | 12649.7363                                                        |

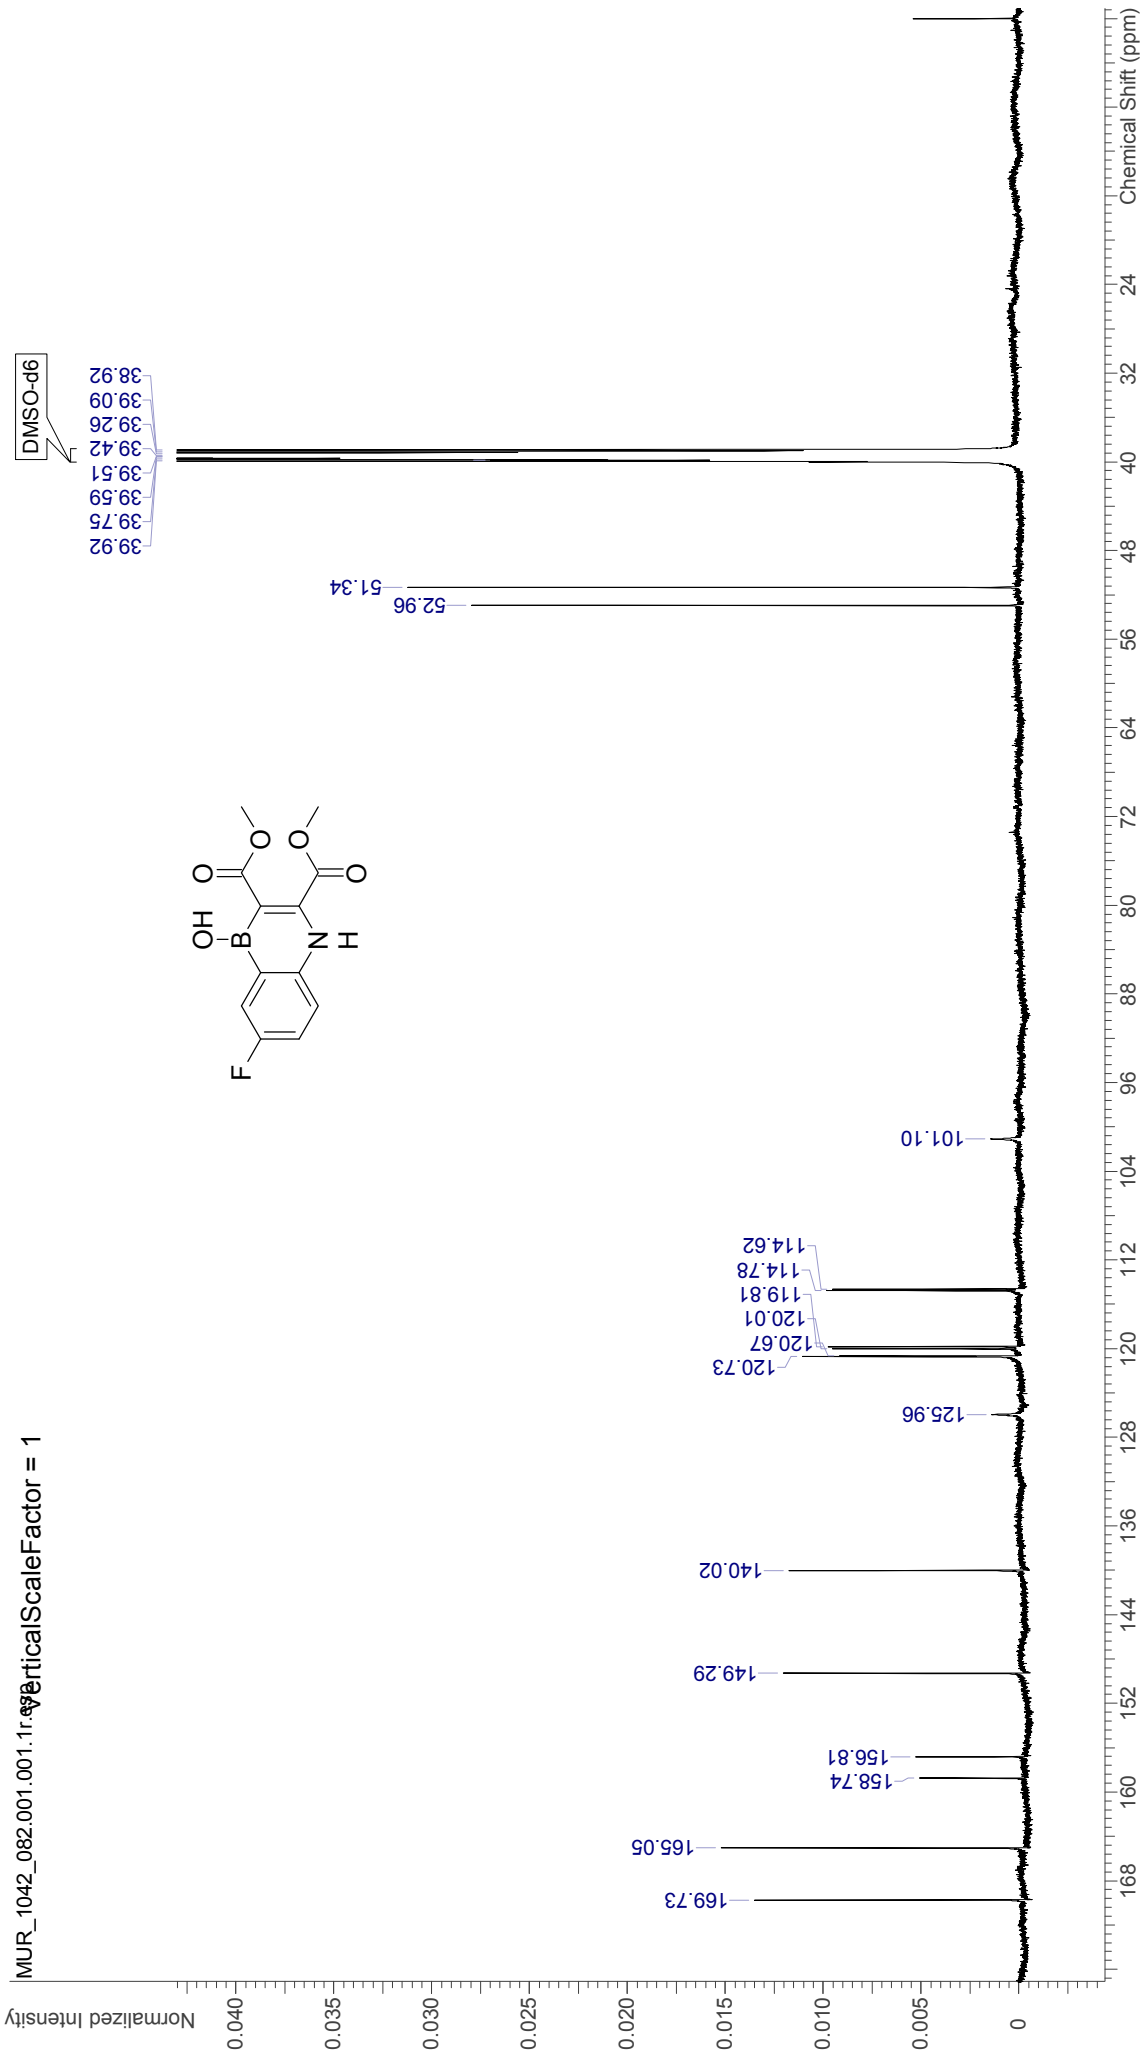

| OriginalDateForRelativeTime |                      | 2014-04-15T12:22:32  |                                                                  | Multiplets Integrals Sum |                      | 0.00             |          | Number of Nuclei       |          | 1 B's |  |
|-----------------------------|----------------------|----------------------|------------------------------------------------------------------|--------------------------|----------------------|------------------|----------|------------------------|----------|-------|--|
| Acquisition Time (sec)      | 1.7007               | Comment              | MUR_1042_082BN                                                   | Date                     | 15 Apr 2014 12:22:32 |                  |          |                        |          |       |  |
| Date Stamp                  | 15 Apr 2014 12:22:32 | File Name            | \\inbg\lab176\164\ecm_2014\MUR\data\1MED\nmr\MUR_1042_082BN\1fid |                          |                      |                  |          |                        |          |       |  |
| Frequency (MHz)             | 96.29                | Nucleus              | 11B                                                              | Number of Transients     | 4000                 | Origin           | av300    | Original Points Count  | 32768    |       |  |
| Owner                       | administrator        | Points Count         | 32768                                                            | Pulse Sequence           | zg                   | Receiver Gain    | 3251.00  | SW(cyclical) (Hz)      | 19267.82 |       |  |
| Solvent                     | DMSO-d6              | Spectrum Offset (Hz) | 0.1662                                                           | Spectrum Type            | STANDARD             | Sweep Width (Hz) | 19267.23 | Temperature (degree C) | 25.000   |       |  |

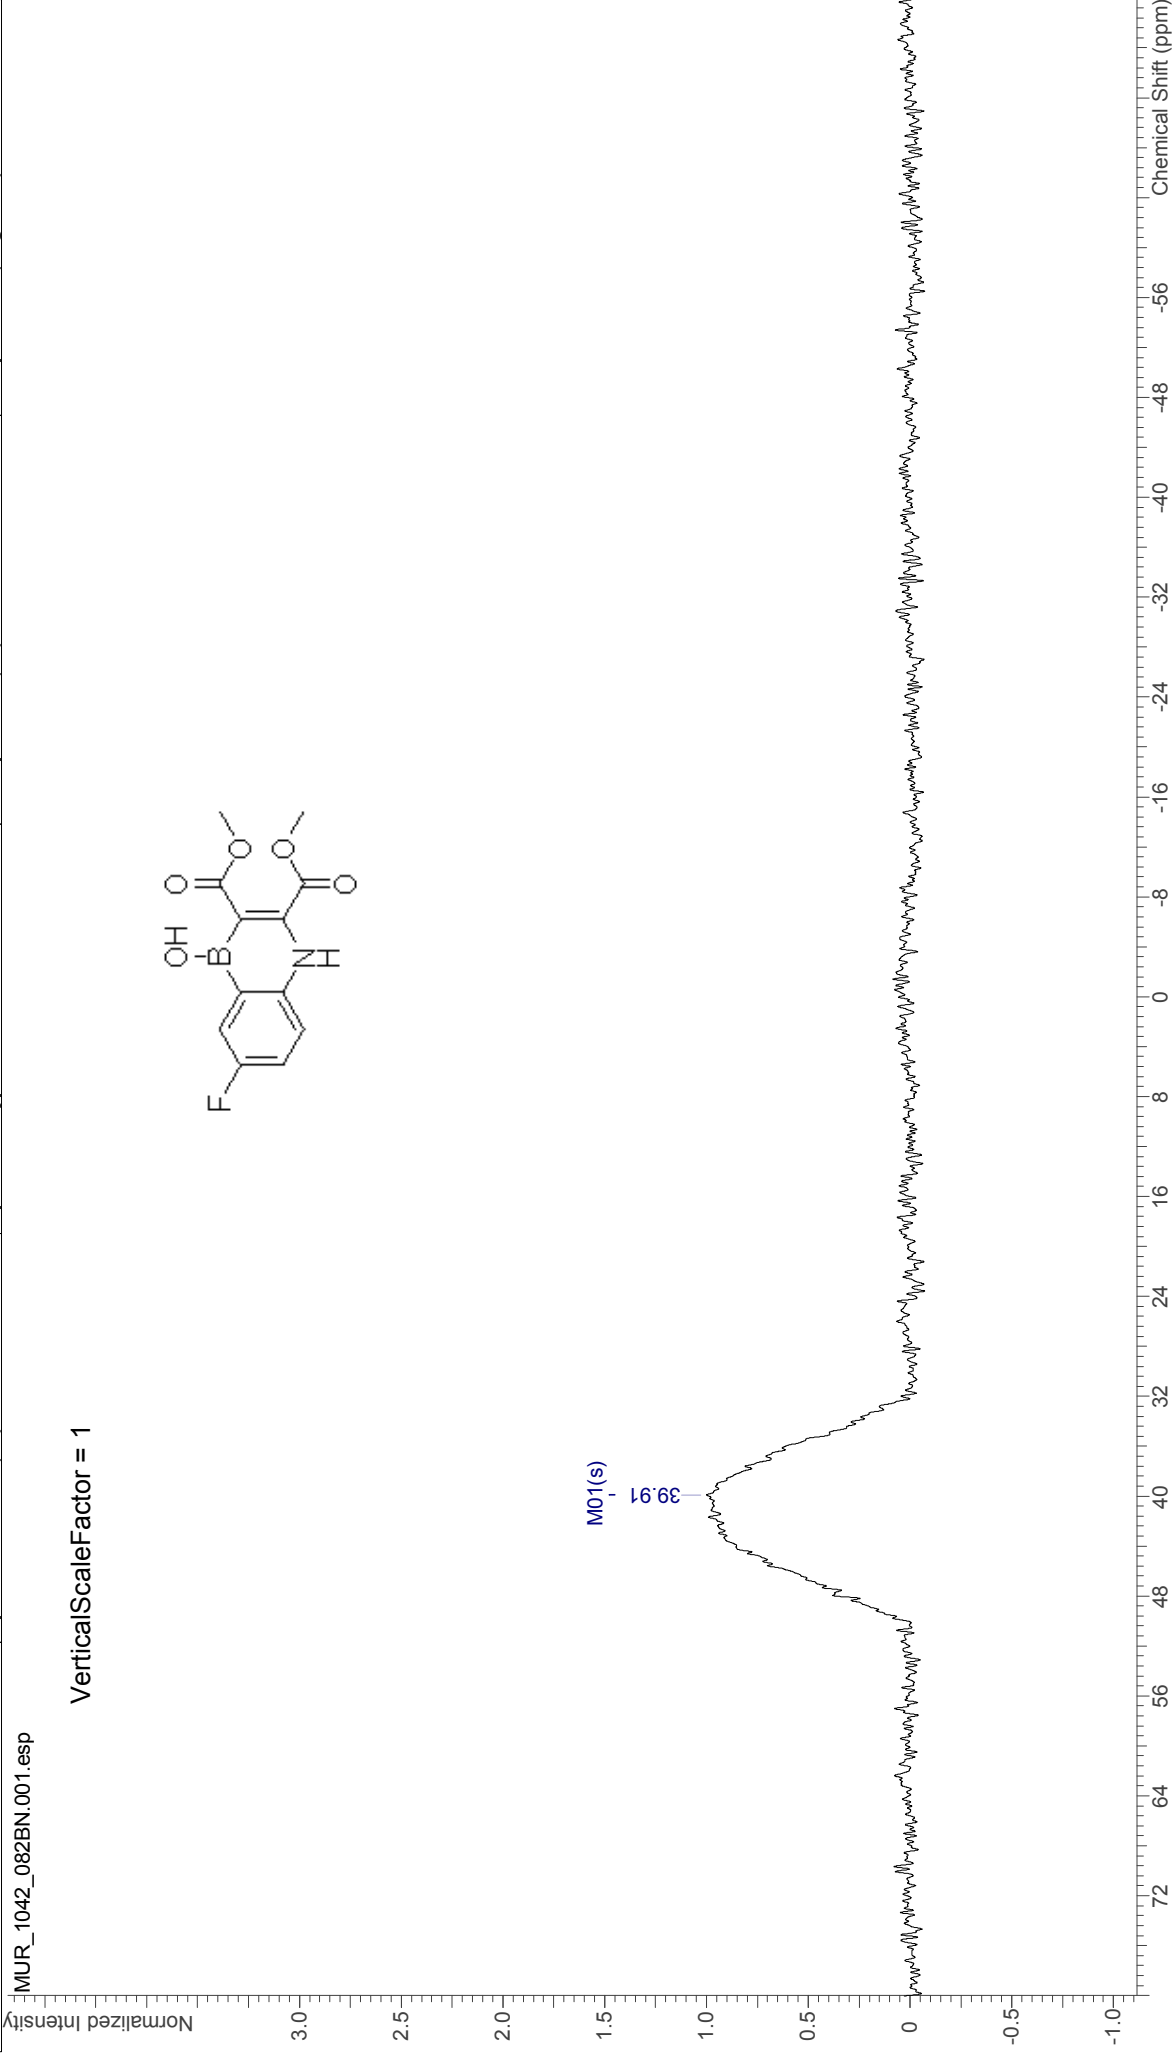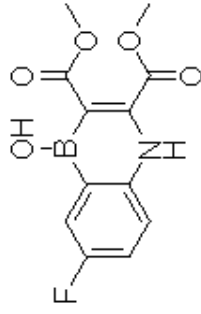

|                                                        |                                  |                                                                                       |                                       |                                |  |
|--------------------------------------------------------|----------------------------------|---------------------------------------------------------------------------------------|---------------------------------------|--------------------------------|--|
| <b>OriginalDateForRelativeTime</b> 2014-03-25T09:02:00 |                                  | <b>Multiplets Integrals Sum</b> 13.91                                                 |                                       | <b>Number of Nuclei</b> 14 H's |  |
| <b>Acquisition Time (sec)</b> 5.3084                   | <b>Comment</b> MUR_1042_055P     | <b>File Name</b> \\inbglab176164\ecm_2014\MUR\data\lMED\inmr\MUR_1042_055P11\data111r | <b>Date</b> 25 Mar 2014 09:02:00      |                                |  |
| <b>Date Stamp</b> 25 Mar 2014 09:02:00                 | <b>Nucleus</b> 1H                | <b>Number of Transients</b> 64                                                        | <b>Origin</b> av300                   |                                |  |
| <b>Frequency (MHz)</b> 300.13                          | <b>Owner</b> administrator       | <b>Points Count</b> 32768                                                             | <b>Pulse Sequence</b> zg30            |                                |  |
| <b>Original Points Count</b> 32768                     | <b>SW(cyclical) (Hz)</b> 6172.84 | <b>Solvent</b> DMSO-d6                                                                | <b>Spectrum Offset (Hz)</b> 1853.7598 |                                |  |
| <b>Receiver Gain</b> 1149.40                           | <b>Sweep Width (Hz)</b> 6172.65  | <b>Temperature (degree C)</b> 25.000                                                  |                                       |                                |  |
| <b>Spectrum Type</b> STANDARD                          |                                  |                                                                                       |                                       |                                |  |

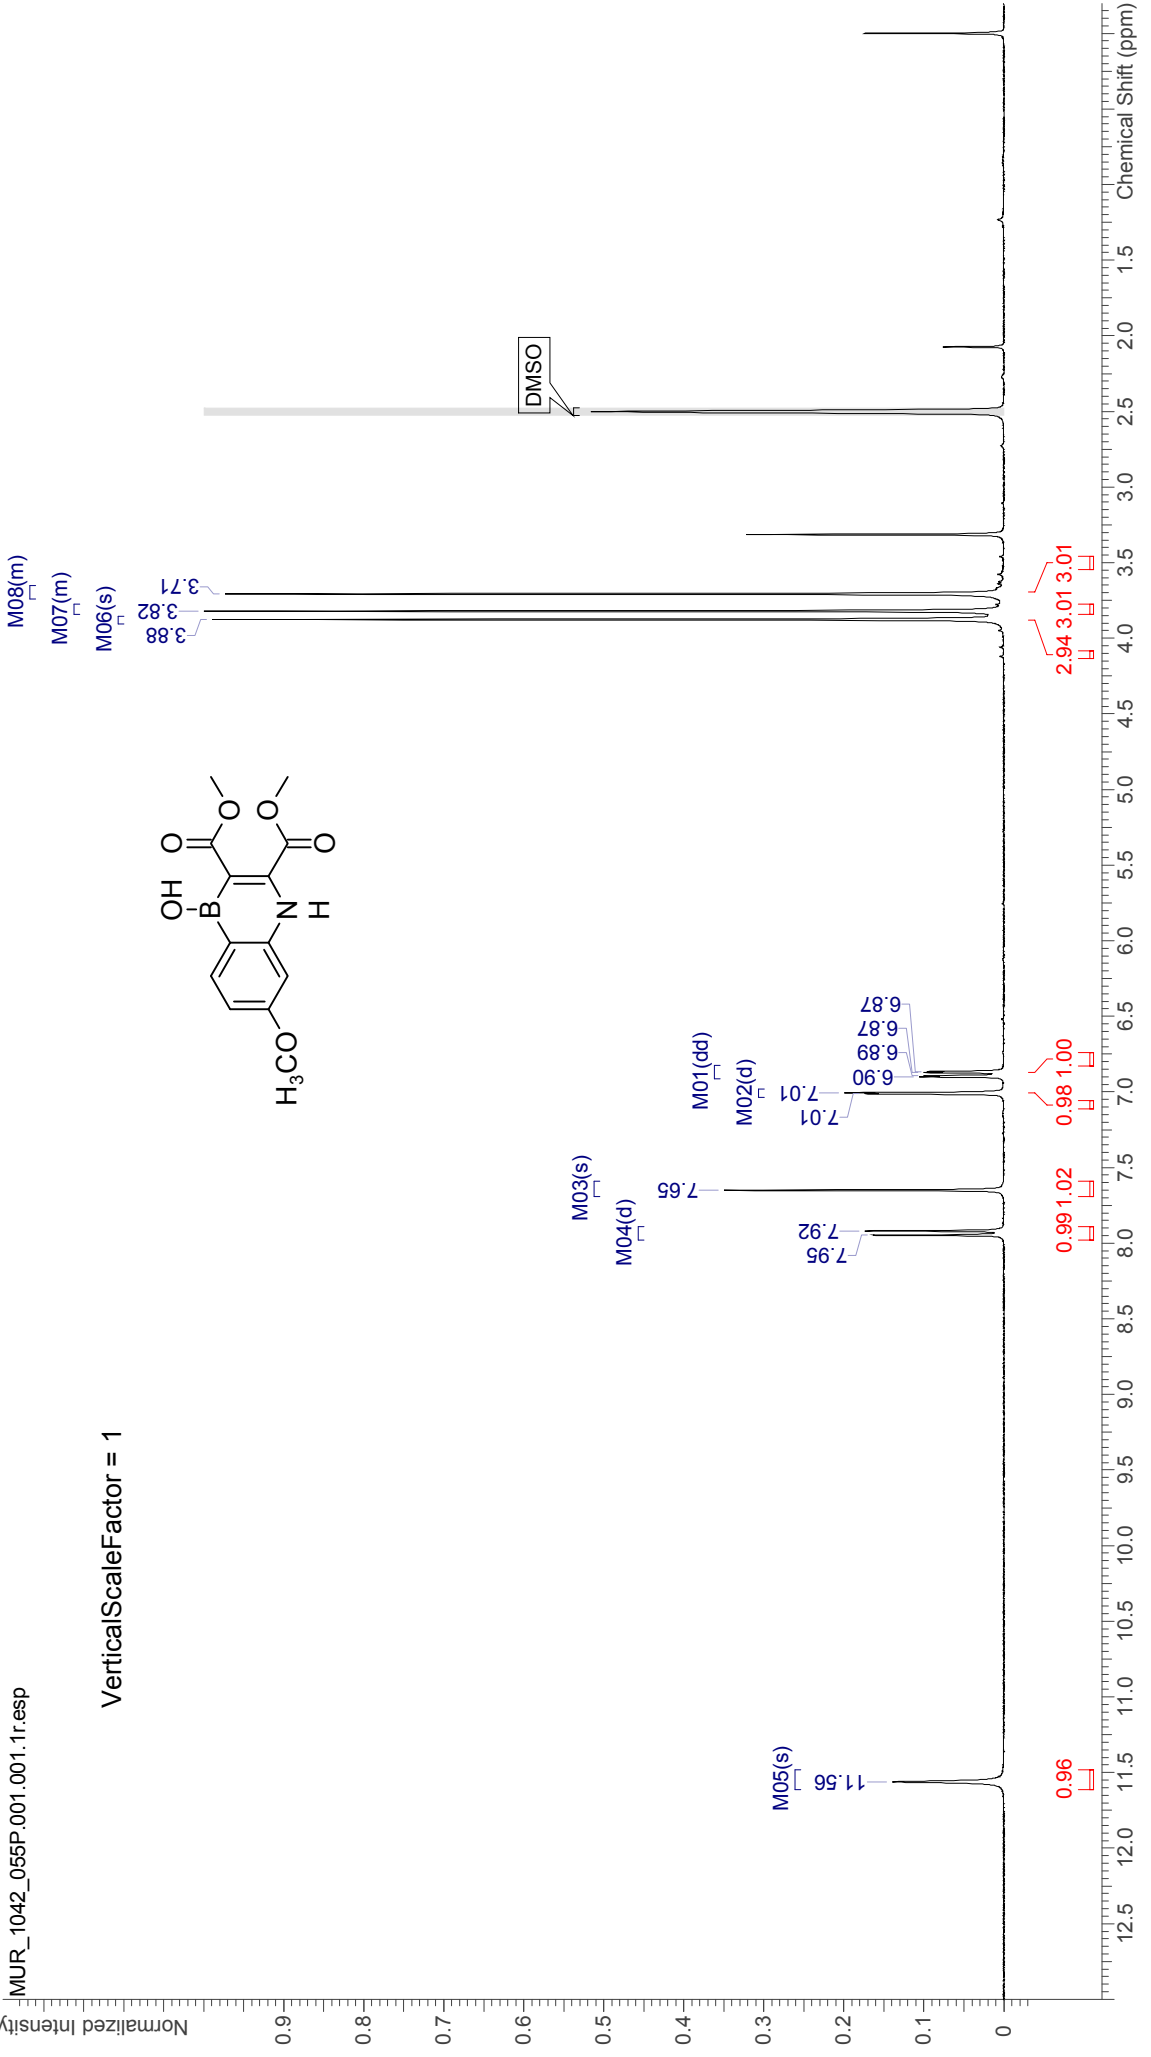



| OriginalDateForRelativeTime | 2014-03-25T23:19:36                                             | Multiplets Integrals Sum | 0.00                                                     | Number of Nuclei      | 0 C's    |
|-----------------------------|-----------------------------------------------------------------|--------------------------|----------------------------------------------------------|-----------------------|----------|
| Acquisition Time (sec)      | 1.0912                                                          | Comment                  | MUR_1042_055 C-13CPD DMSO (F:\ecm\DATA\2014-03} bionmr 3 |                       |          |
| Date                        | 25 Mar 2014 23:19:36                                            | Date Stamp               | 25 Mar 2014 23:19:36                                     |                       |          |
| File Name                   | C:\Users\kvjk299\Desktop\C1328032014\MUR\MUR_1042_5512\data\11r | Origin                   | spect                                                    | Frequency (MHz)       | 125.77   |
| Nucleus                     | 13C                                                             | Number of Transients     | 10000                                                    | Original Points Count | 32768    |
| Owner                       | administrator                                                   | Points Count             | 32768                                                    | Receiver Gain         | 32768.00 |
| SW(cyclical) (Hz)           | 30030.03                                                        | Solvent                  | DMSO-d6                                                  | Spectrum Type         | STANDARD |
| Sweep Width (Hz)            | 30029.11                                                        | Temperature (degree C)   | 25.000                                                   |                       |          |

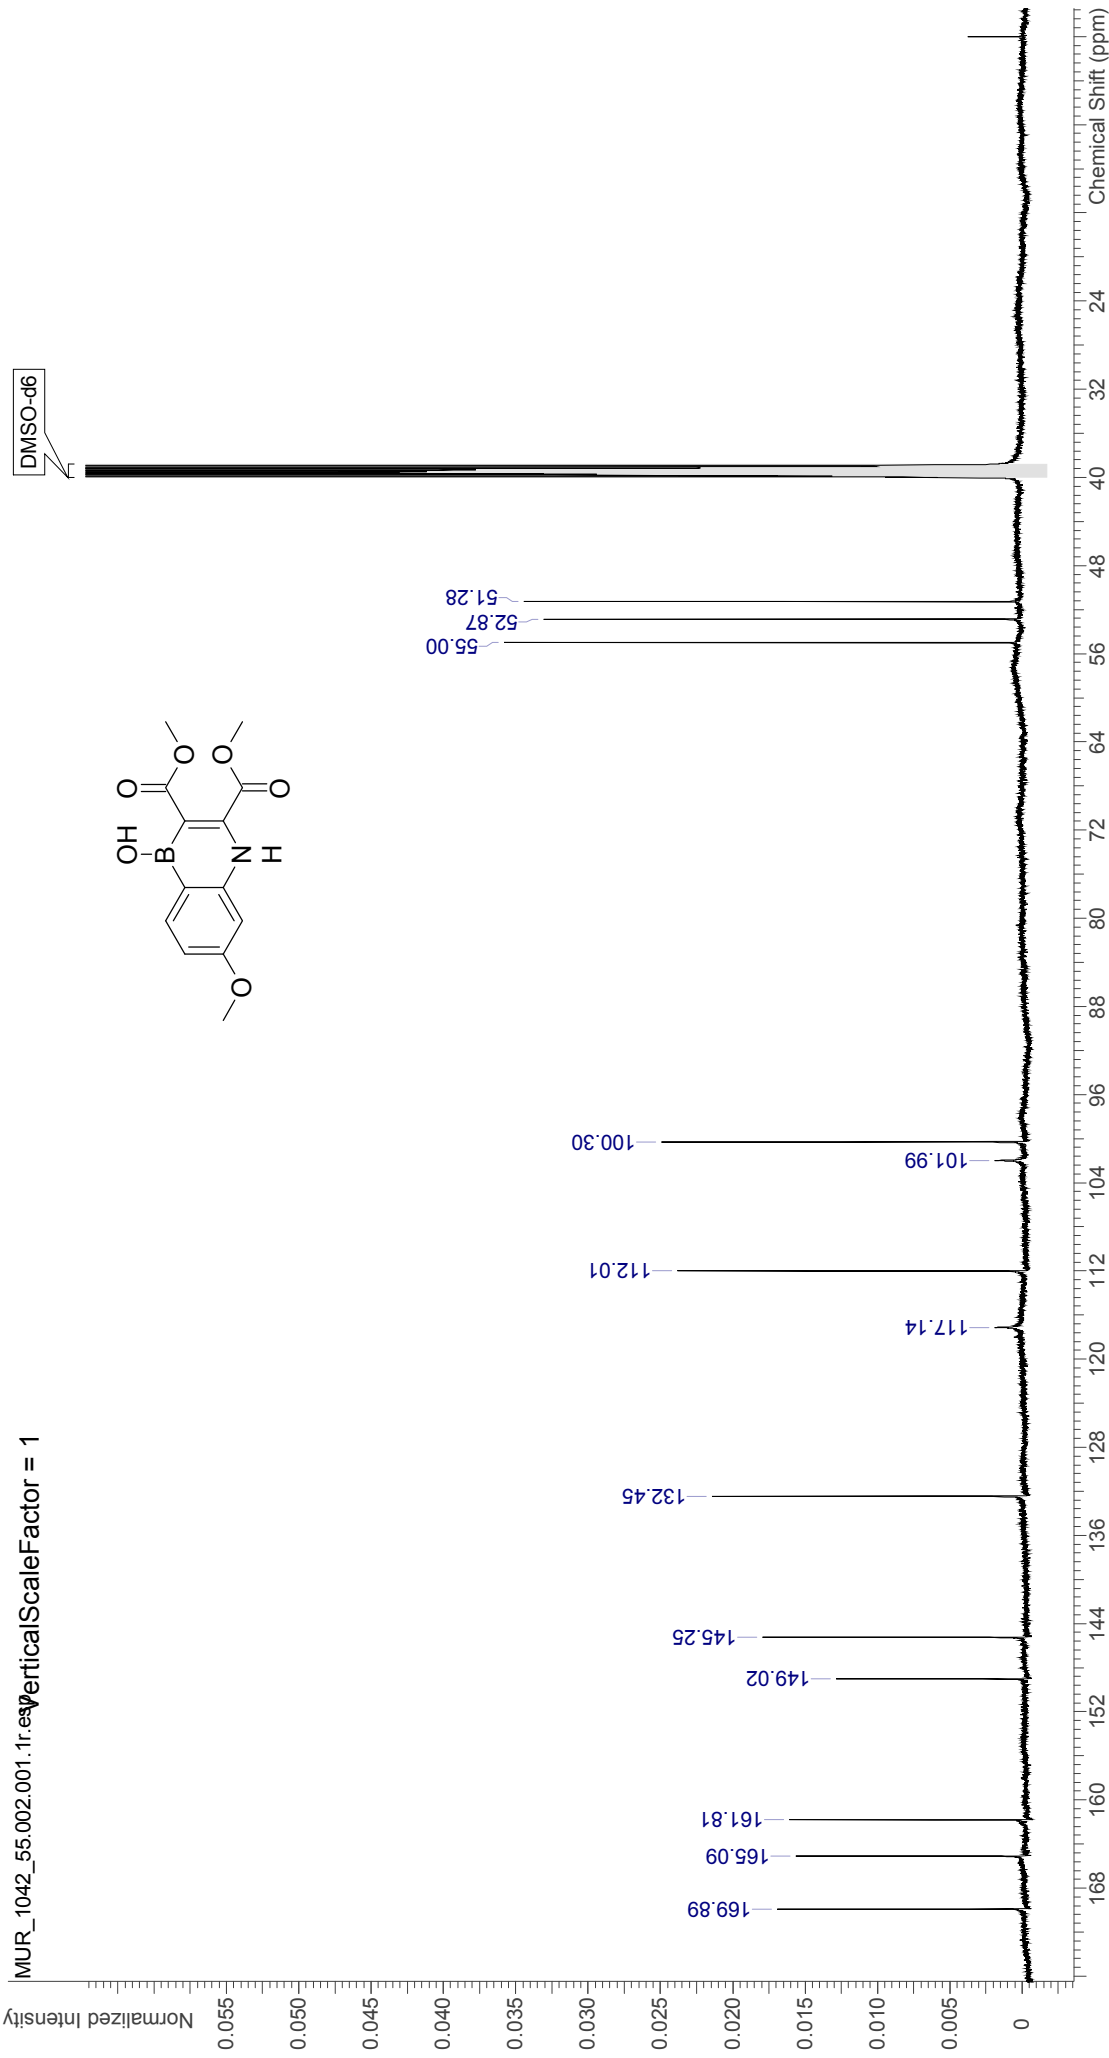

| OriginalDateForRelativeTime |                      | 2014-04-18T12:33:12  |                                                               | Multiplets Integrals Sum |                      | 0.00             |          | Number of Nuclei       |          | 1 B's |  |
|-----------------------------|----------------------|----------------------|---------------------------------------------------------------|--------------------------|----------------------|------------------|----------|------------------------|----------|-------|--|
| Acquisition Time (sec)      | 1.7007               | Comment              | MUR_1042_055                                                  | Date                     | 18 Apr 2014 12:33:12 |                  |          |                        |          |       |  |
| Date Stamp                  | 18 Apr 2014 12:33:12 | File Name            | \\inbglab176164\ecm_2014\MUR\data\IMED\nmr\MUR_1042_055a1.fid |                          |                      |                  |          |                        |          |       |  |
| Frequency (MHz)             | 96.29                | Nucleus              | 11B                                                           | Number of Transients     | 3000                 | Origin           | av300    | Original Points Count  | 32768    |       |  |
| Owner                       | administrator        | Points Count         | 32768                                                         | Pulse Sequence           | zg                   | Receiver Gain    | 3649.10  | SW(cyclical) (Hz)      | 19267.82 |       |  |
| Solvent                     | DMSO-d6              | Spectrum Offset (Hz) | 0.1662                                                        | Spectrum Type            | STANDARD             | Sweep Width (Hz) | 19267.23 | Temperature (degree C) | 25.000   |       |  |

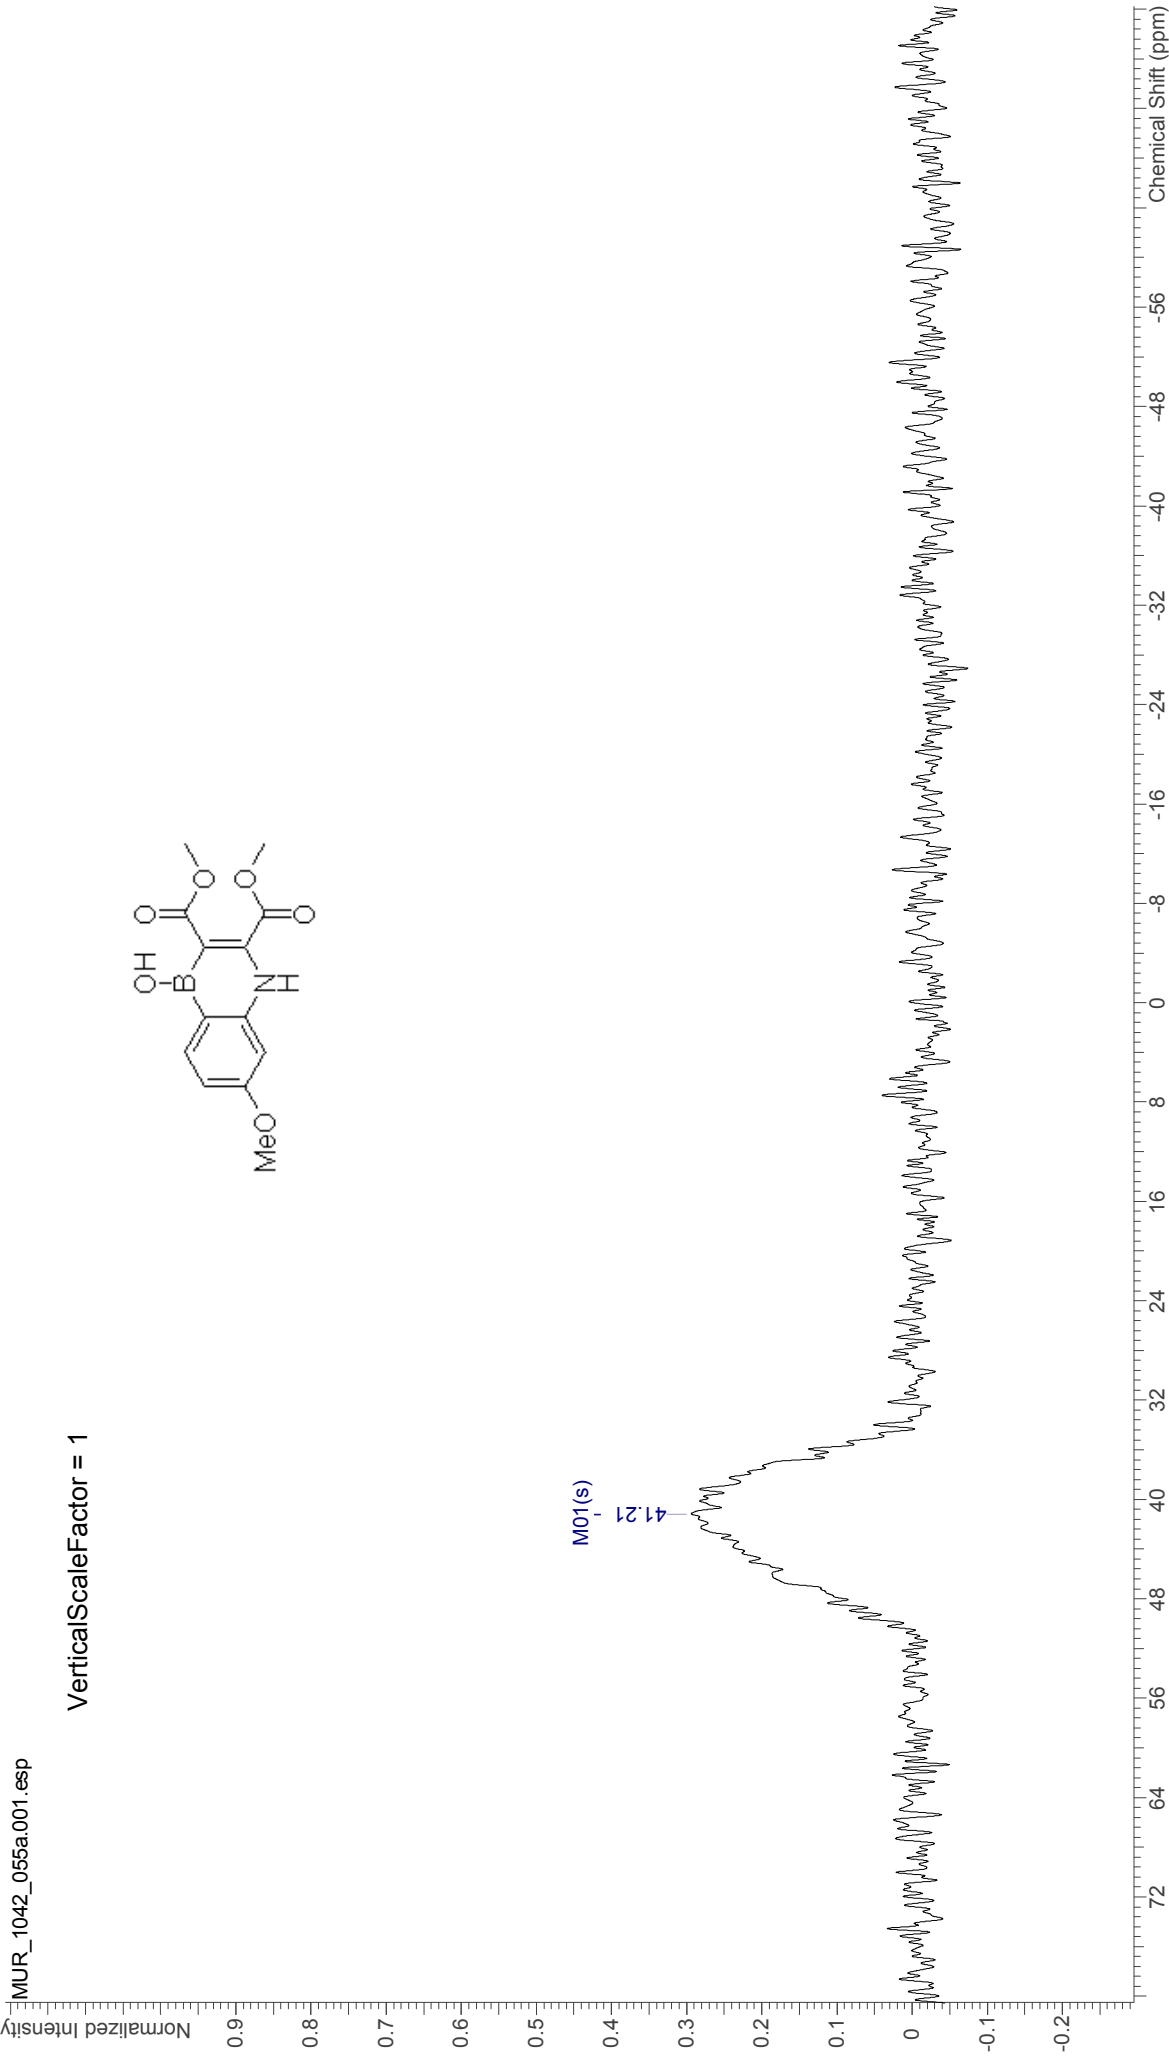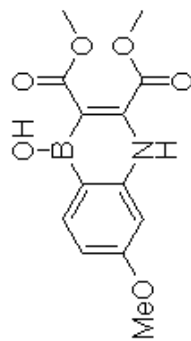

Supplement: c5ra05082k1.pdf [file c5ra05082k1.pdf]
