# Supplementary material for: Synthesis of benzofused 1,4-azaborinols via [4 + 2] annulation strategy and its application in indole synthesis
Source: Royal Society of Chemistry journal article supplement (doi:10.1039/c5ra05082k), 2015-01-01

MUR\_1042\_59

| OriginalDateForRelativeTime | 2014-02-27T12:14:00  | Multiplets Integrals Sum | 11.43                                                        | Number of Nuclei       | 11 H's               |
|-----------------------------|----------------------|--------------------------|--------------------------------------------------------------|------------------------|----------------------|
| Acquisition Time (sec)      | 5.3084               | Comment                  | MUR_1042_59                                                  | Date                   | 27 Feb 2014 12:14:00 |
| Date Stamp                  | 27 Feb 2014 12:14:00 | File Name                | \\inbglab176164\ecm_2014\MUR\data\NMR\MUR_1042_59\1\data\11r | Origin                 | av300                |
| Frequency (MHz)             | 300.13               | Nucleus                  | 1H                                                           | Pulse Sequence         | zg30                 |
| Original Points Count       | 32768                | Owner                    | administrator                                                | Solvent                | DMSO-d6              |
| Receiver Gain               | 1625.50              | SW(cyclical) (Hz)        | 6172.84                                                      | Temperature (degree C) | 25.000               |
| Spectrum Type               | STANDARD             | Sweep Width (Hz)         | 6172.65                                                      |                        |                      |

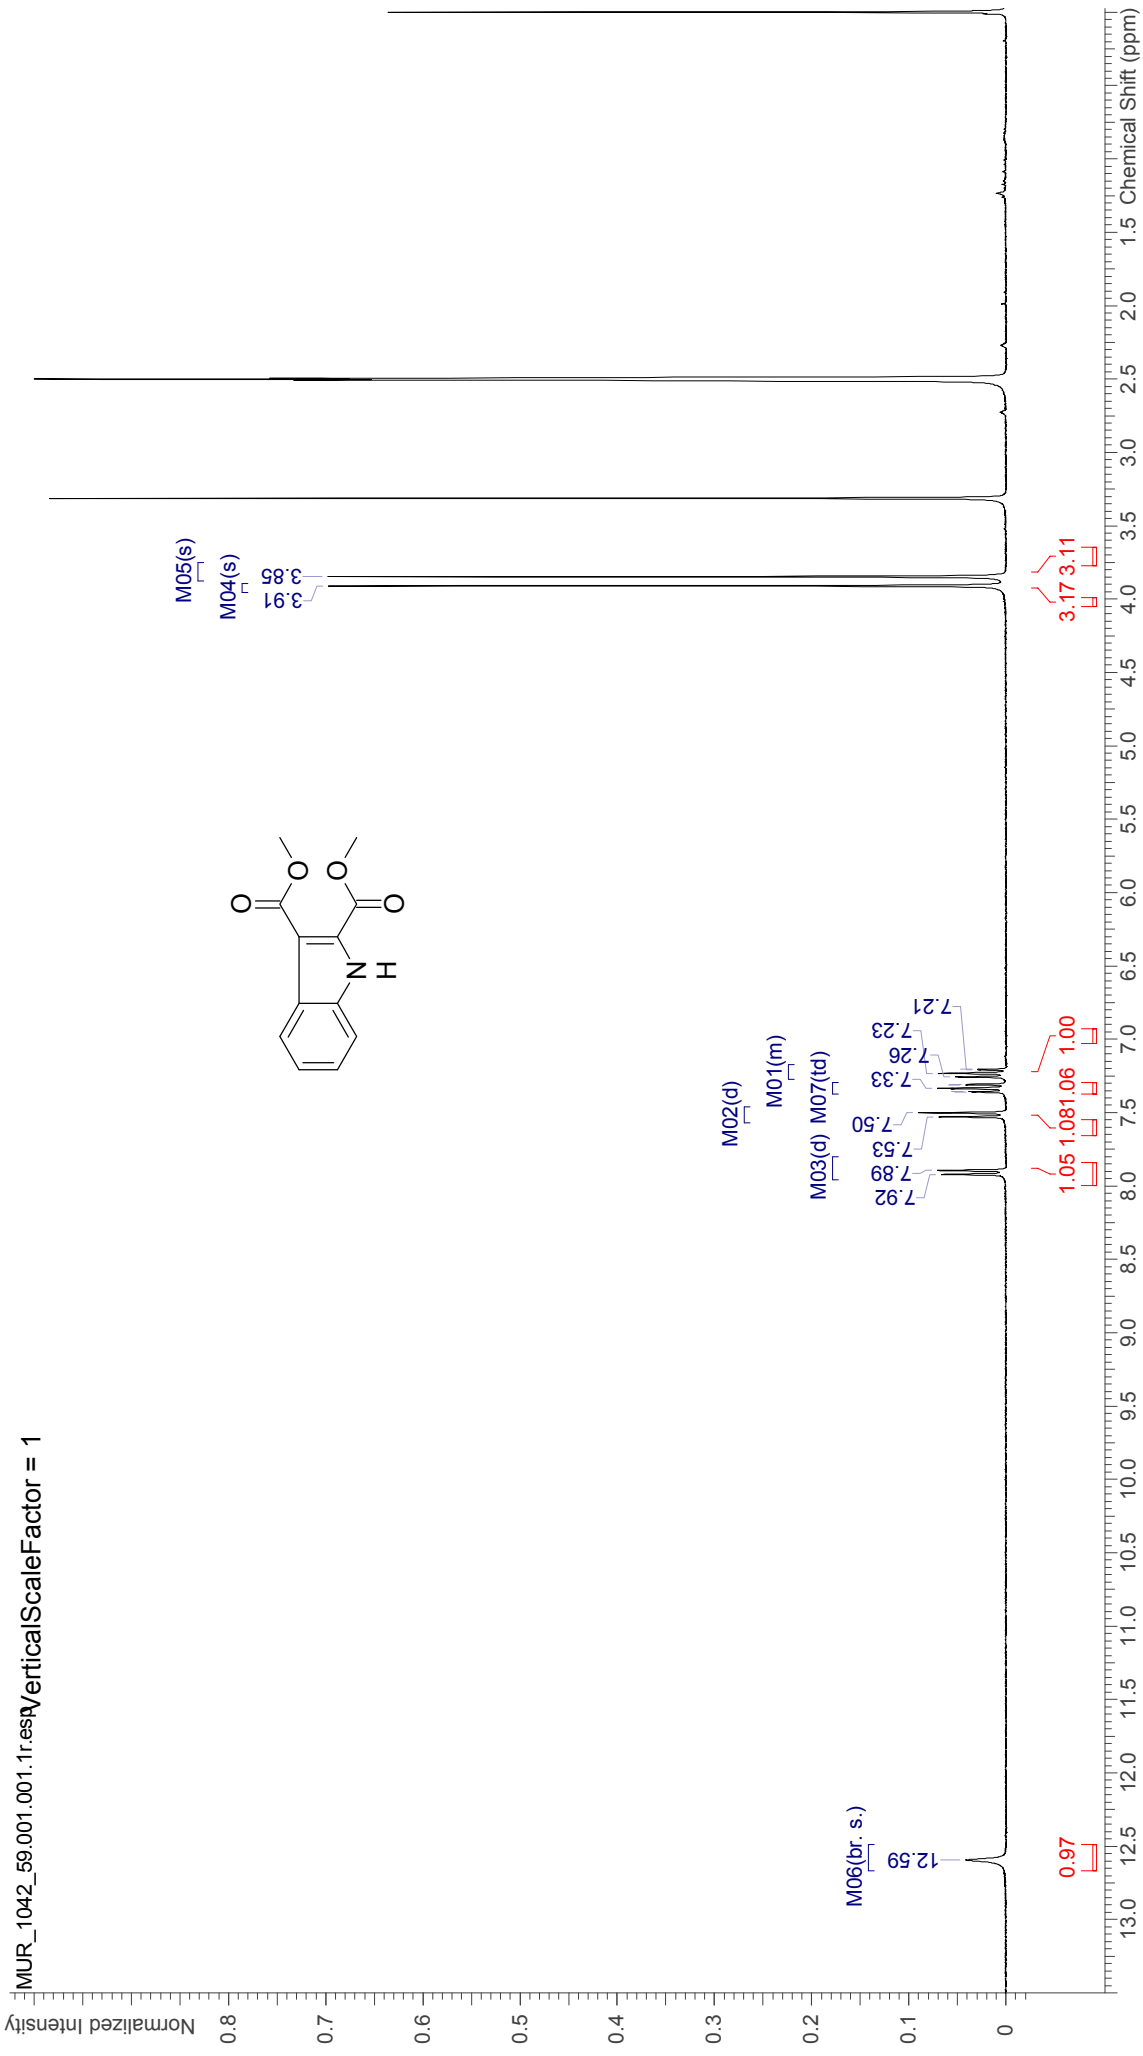

| OriginalDateForRelativeTime | 2014-02-28T12:52:24                                   | Multiplets Integrals Sum | 0.00                                                   | Number of Nuclei  | 0 C's         |
|-----------------------------|-------------------------------------------------------|--------------------------|--------------------------------------------------------|-------------------|---------------|
| Acquisition Time (sec)      | 1.0912                                                | Comment                  | MUR_1042_59 C13CPD DMSO (F:\ecm\DATA\2013-11} bionmr-1 |                   |               |
| Date                        | 28 Feb 2014 12:52:24                                  | Date Stamp               | 28 Feb 2014 12:52:24                                   | Nucleus           | 13C           |
| File Name                   | C:\Users\kvjk299\Desktop\C13\MUR_1042_59\1\pdata\1\1r | Frequency (MHz)          | 125.77                                                 | Owner             | administrator |
| Number of Transients        | 2048                                                  | Original Points Count    | 32768                                                  | SW(cyclical) (Hz) | 30030.03      |
| Points Count                | 32768                                                 | Receiver Gain            | 32768.00                                               | Sweep Width (Hz)  | 30029.11      |
| Solvent                     | DMSO-d6                                               | Spectrum Type            | STANDARD                                               |                   |               |
| Temperature (degree C)      | 25.000                                                | Spectrum Offset (Hz)     | 12515.1611                                             |                   |               |

MUR\_1042\_59.001.001.1r.esq VerticalScaleFactor = 1

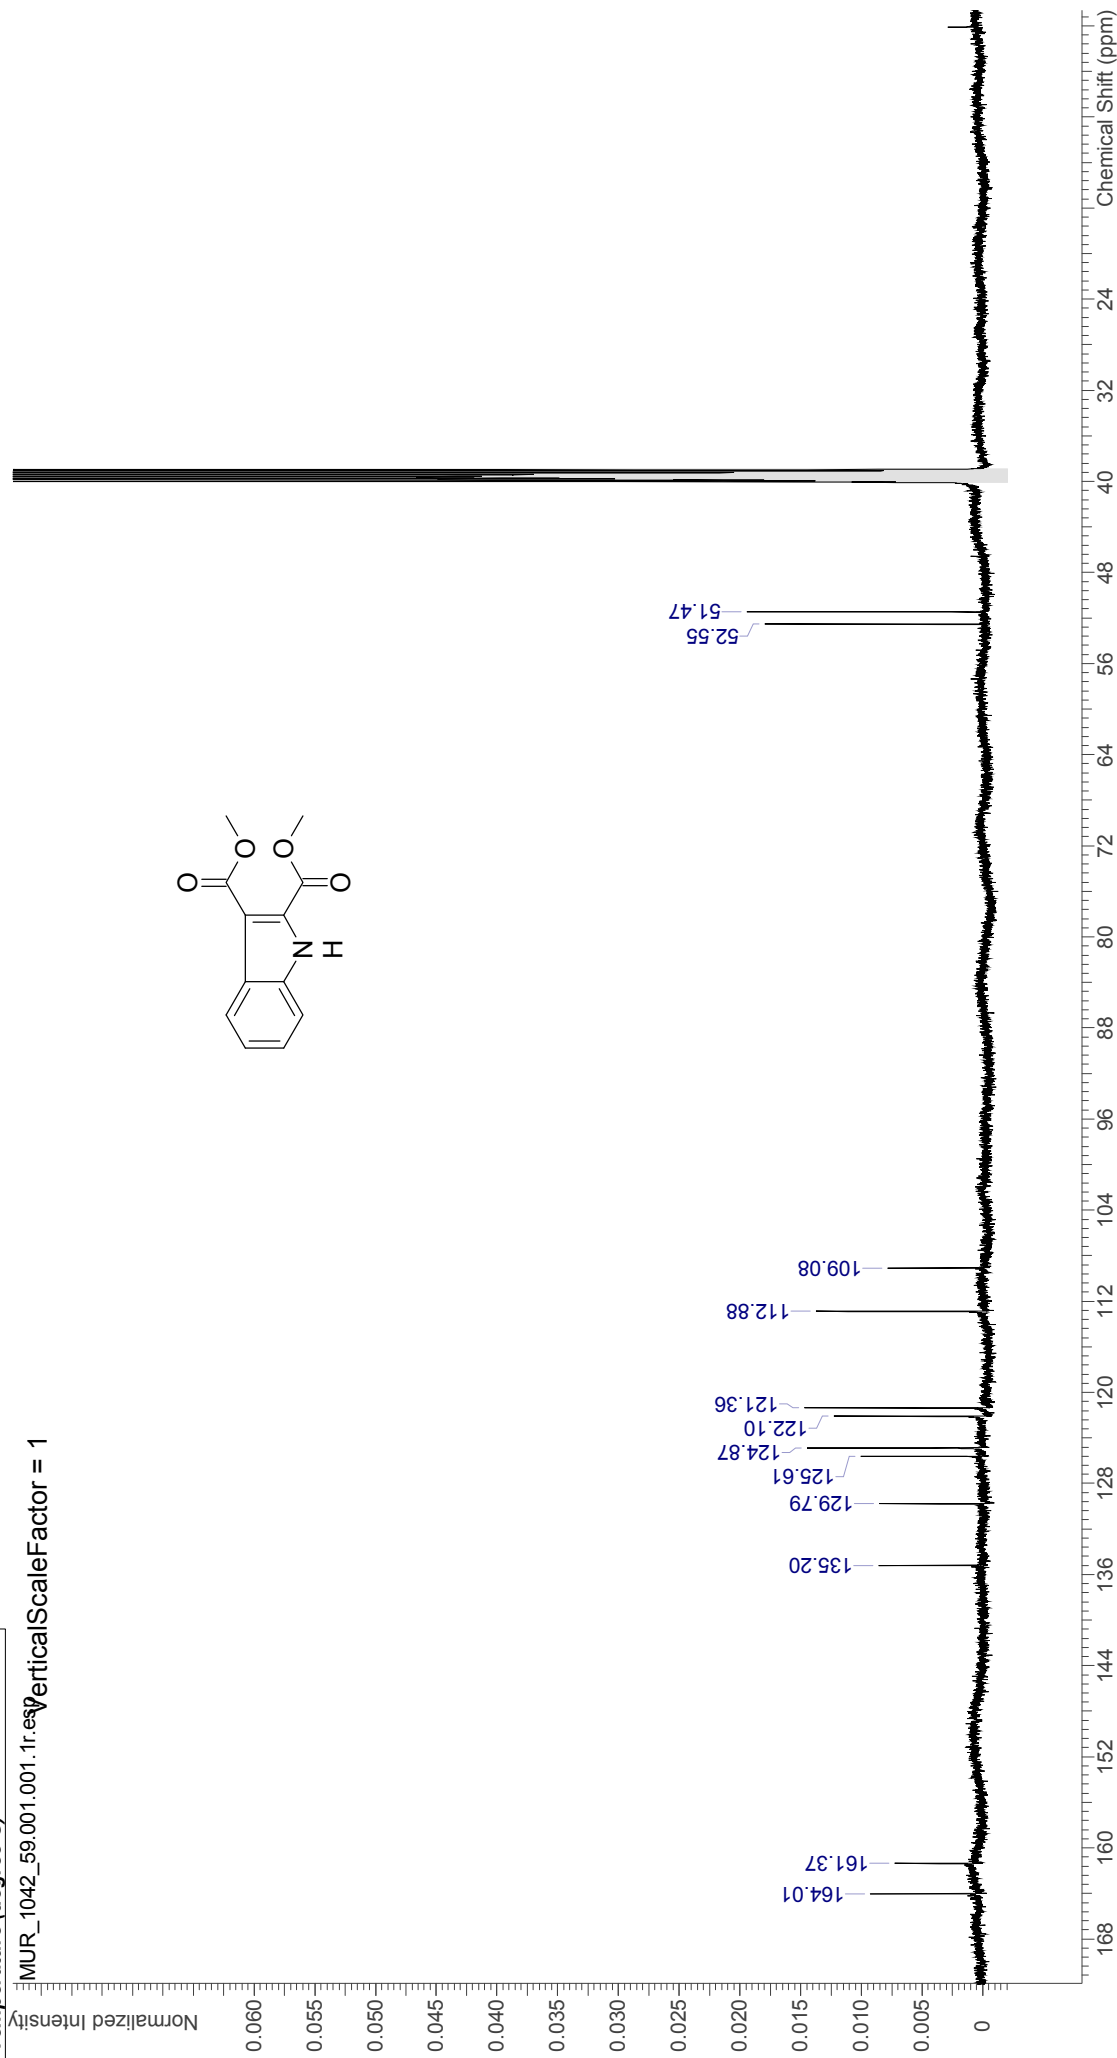

|                                                 |                      |                          |                                                                   |                        |                      |                      |           |        |  |
|-------------------------------------------------|----------------------|--------------------------|-------------------------------------------------------------------|------------------------|----------------------|----------------------|-----------|--------|--|
| OriginalDateForRelativeTime 2014-03-27T20:26:48 |                      | Multiplets Integrals Sum |                                                                   | 15.14                  |                      | Number of Nuclei     |           | 15 H's |  |
| Acquisition Time (sec)                          | 5.3084               | Comment                  | MUR_1042_099                                                      | Date                   | 27 Mar 2014 20:26:48 |                      |           |        |  |
| Date Stamp                                      | 27 Mar 2014 20:26:48 | File Name                | \\inbglab176164\ecm_2014\MUR\data\MED\mmr\MUR_1042_0991\pdata111r |                        |                      |                      |           |        |  |
| Frequency (MHz)                                 | 300.13               | Nucleus                  | 1H                                                                | Origin                 | av300                |                      |           |        |  |
| Original Points Count                           | 32768                | Owner                    | administrator                                                     | Pulse Sequence         | zg30                 |                      |           |        |  |
| Receiver Gain                                   | 1448.20              | SW(cyclical) (Hz)        | 6172.84                                                           | Solvent                | DMSO-d6              | Spectrum Offset (Hz) | 1853.6636 |        |  |
| Spectrum Type                                   | STANDARD             | Sweep Width (Hz)         | 6172.65                                                           | Temperature (degree C) | 25.000               |                      |           |        |  |

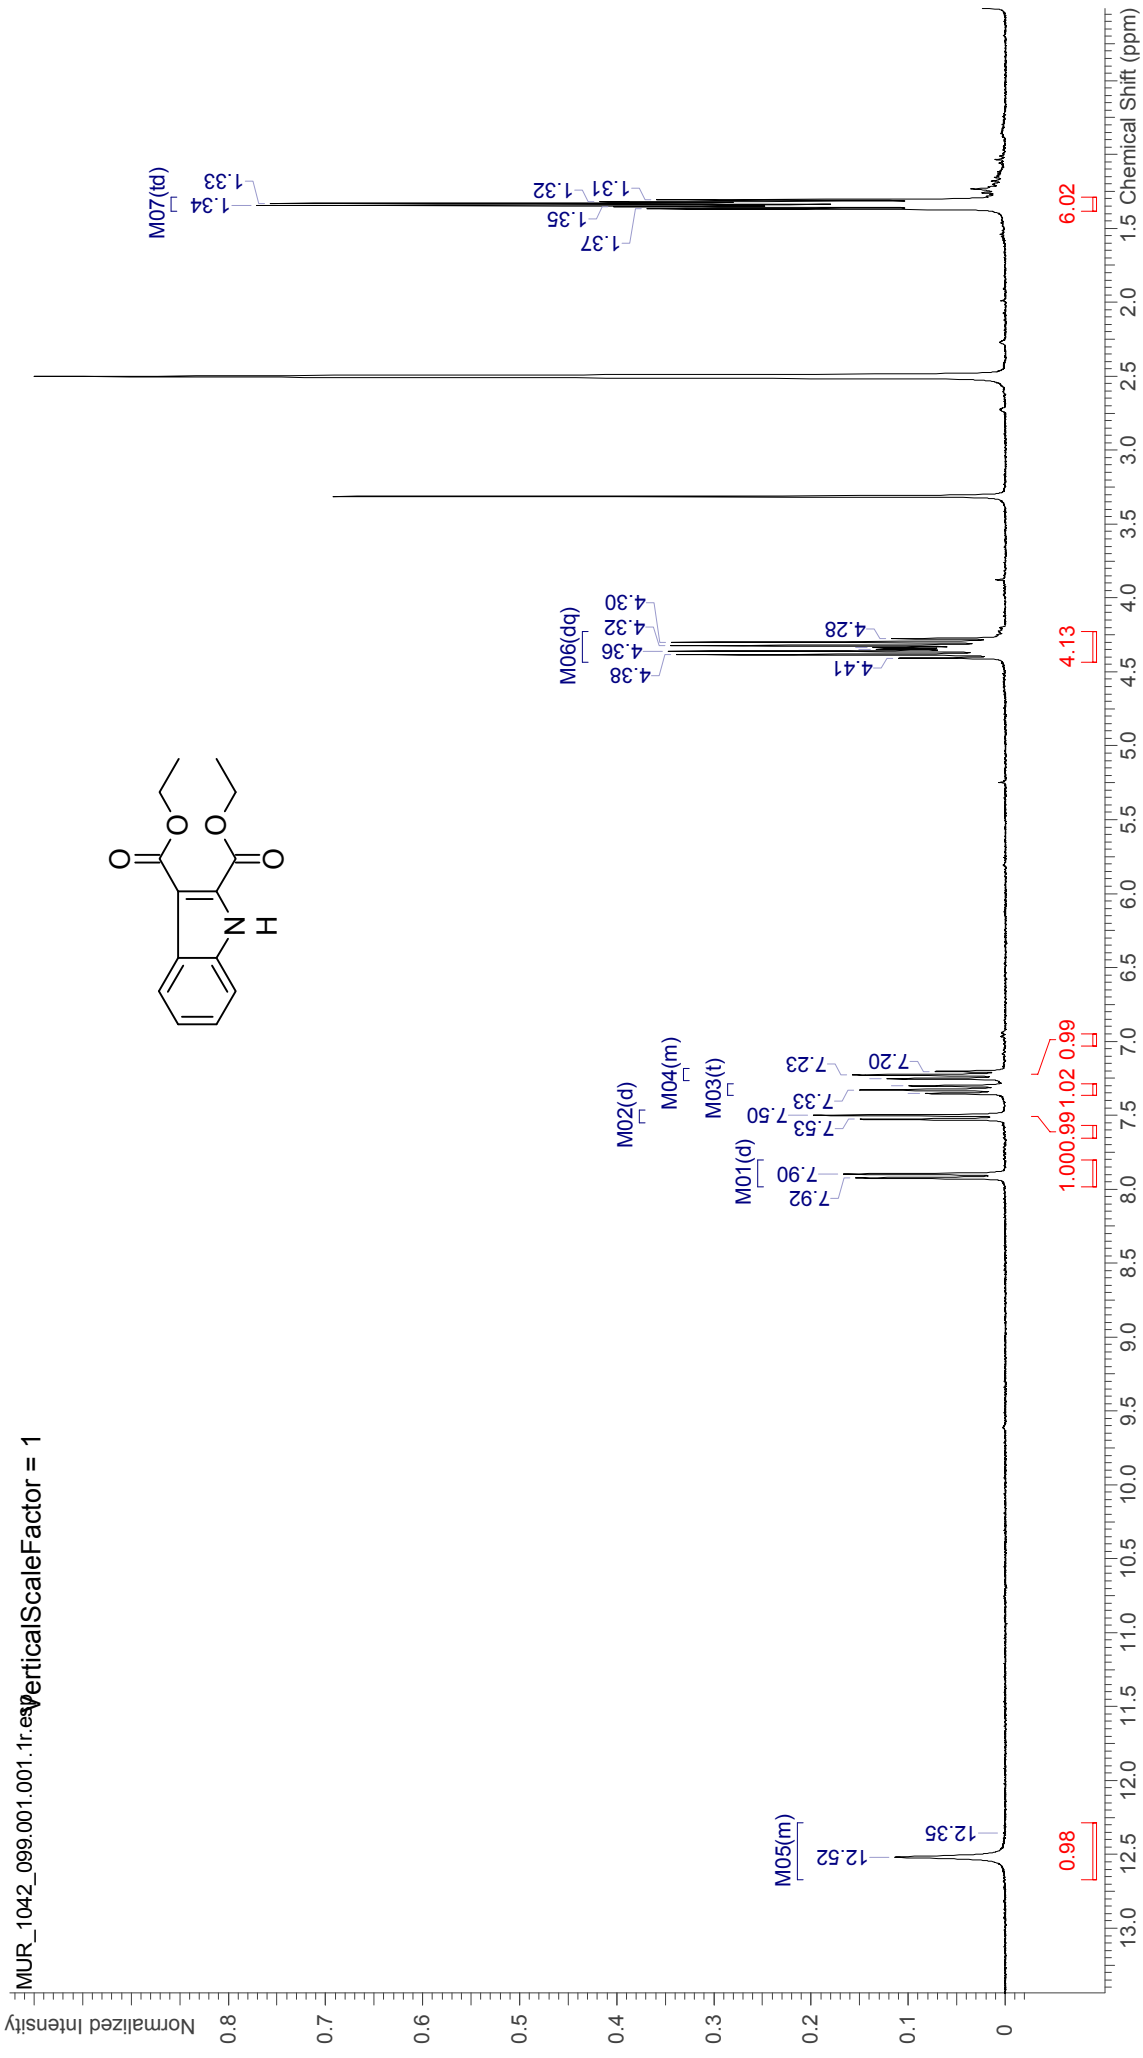

| OriginalDateForRelativeTime | 2014-03-30T05:56:24  | Multiplets Integrals Sum | 0.00                                                    | Number of Nuclei     | 0 C's                                                            |
|-----------------------------|----------------------|--------------------------|---------------------------------------------------------|----------------------|------------------------------------------------------------------|
| Acquisition Time (sec)      | 1.0912               | Comment                  | mur_1042_85 C-13CPD DMSO (F:\ecm\DATA\2013-11} bionmr 4 | Date                 | 30 Mar 2014 05:56:24                                             |
| Date Stamp                  | 30 Mar 2014 05:56:24 | Nucleus                  | 13C                                                     | File Name            | C:\Users\kyj\k299\Desktop\C13\recent c13\MUR_1042_085\1pdata\11r |
| Frequency (MHz)             | 125.77               | Owner                    | administrator                                           | Number of Transients | 8000                                                             |
| Original Points Count       | 32768                | SW(cyclical) (Hz)        | 30030.03                                                | Points Count         | 32768                                                            |
| Receiver Gain               | 32768.00             | Sweep Width (Hz)         | 30029.11                                                | Solvent              | DMSO-d6                                                          |
| Spectrum Type               | STANDARD             | Temperature (degree C)   | 25.000                                                  | Pulse Sequence       | zpgg30                                                           |
|                             |                      |                          |                                                         | Spectrum Offset (Hz) | 12650.8301                                                       |

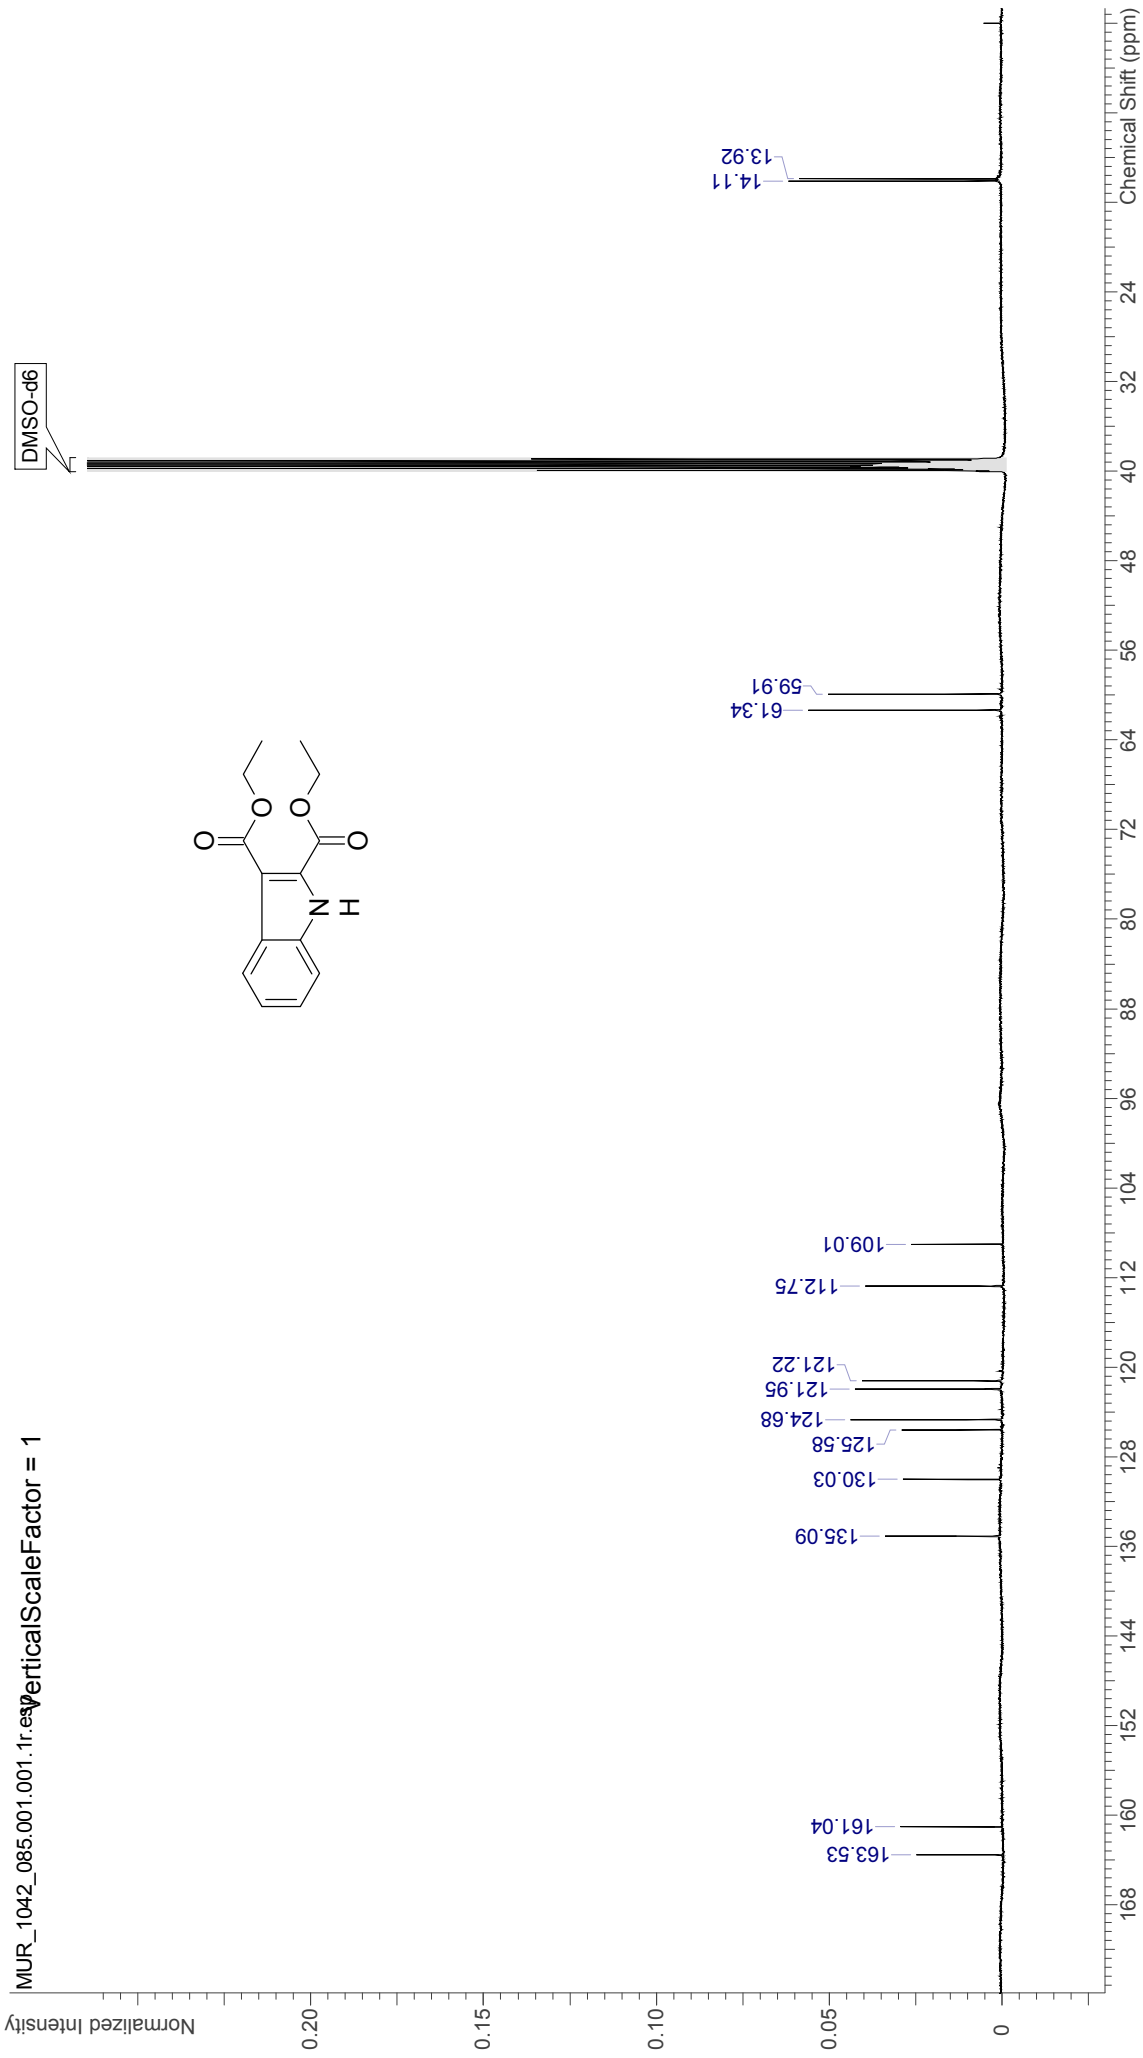

|                                                        |                                                                                   |                                       |  |                                |  |
|--------------------------------------------------------|-----------------------------------------------------------------------------------|---------------------------------------|--|--------------------------------|--|
| <b>OriginalDateForRelativeTime</b> 2014-03-26T21:03:04 |                                                                                   | <b>Multiplets Integrals Sum</b> 12.27 |  | <b>Number of Nuclei</b> 16 H's |  |
| <b>Acquisition Time (sec)</b> 5.3084                   | <b>Comment</b> MUR_1042_093                                                       | <b>Date</b> 26 Mar 2014 21:03:04      |  |                                |  |
| <b>Date Stamp</b> 26 Mar 2014 21:03:04                 | <b>File Name</b> \\inbglab176164\ecm_2014\MUR\data\med\mm\MUR_1042_09311\data111r | <b>Origin</b> av300                   |  |                                |  |
| <b>Frequency (MHz)</b> 300.13                          | <b>Nucleus</b> 1H                                                                 | <b>Pulse Sequence</b> zg30            |  |                                |  |
| <b>Original Points Count</b> 32768                     | <b>Owner</b> administrator                                                        | <b>Spectrum Offset (Hz)</b> 1853.6125 |  |                                |  |
| <b>Receiver Gain</b> 1625.50                           | <b>SW(cyclical) (Hz)</b> 6172.84                                                  | <b>Solvent</b> DMSO-d6                |  |                                |  |
| <b>Spectrum Type</b> STANDARD                          | <b>Sweep Width (Hz)</b> 6172.65                                                   | <b>Temperature (degree C)</b> 25.000  |  |                                |  |

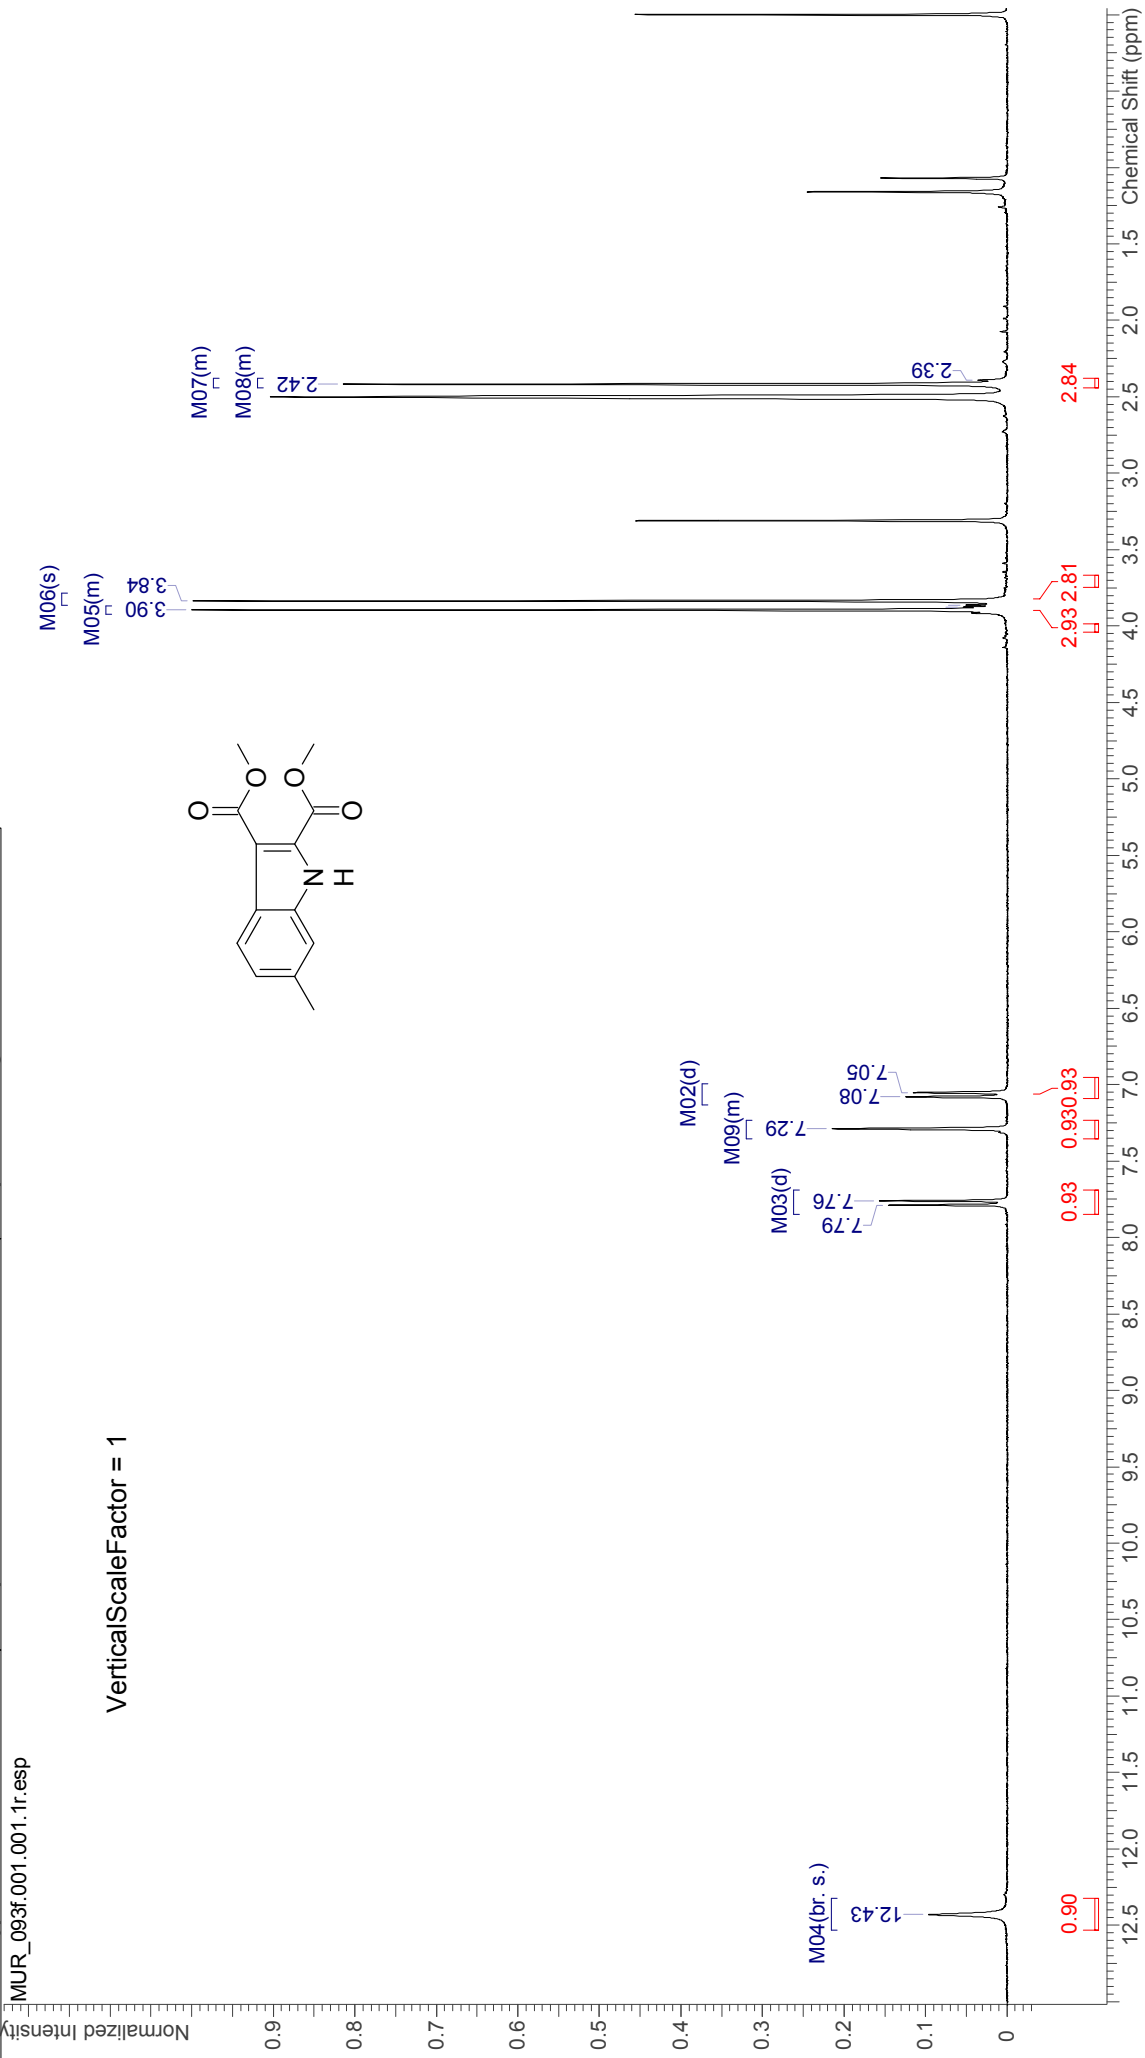

|                                                                                         |                                                                           |                                      |  |                               |  |
|-----------------------------------------------------------------------------------------|---------------------------------------------------------------------------|--------------------------------------|--|-------------------------------|--|
| <b>OriginalDateForRelativeTime</b> 2014-04-05T00:10:48                                  |                                                                           | <b>Multiplets Integrals Sum</b> 0.00 |  | <b>Number of Nuclei</b> 0 C's |  |
| <b>Acquisition Time (sec)</b> 1.0912                                                    | <b>Comment</b> MUR_1042_093C13 C13CPD DMSO (F:\ecm\DATA\2014-04} bionmr 5 |                                      |  |                               |  |
| <b>Date</b> 05 Apr 2014 00:10:48                                                        | <b>Date Stamp</b> 05 Apr 2014 00:10:48                                    |                                      |  |                               |  |
| <b>File Name</b> \\inbgrdsfp01\ELN\data\MUR\MURUGAN-CARBON\mur_1042_093c13\1\pdata\1\1r | <b>Origin</b> spect                                                       | <b>Frequency (MHz)</b> 125.77        |  |                               |  |
| <b>Nucleus</b> 13C                                                                      | <b>Number of Transients</b> 4000                                          | <b>Original Points Count</b> 32768   |  |                               |  |
| <b>Owner</b> administrator                                                              | <b>Points Count</b> 32768                                                 | <b>Receiver Gain</b> 32768.00        |  |                               |  |
| <b>SW(cyclical) (Hz)</b> 30030.03                                                       | <b>Solvent</b> DMSO-d6                                                    | <b>Spectrum Type</b> STANDARD        |  |                               |  |
| <b>Sweep Width (Hz)</b> 30029.11                                                        | <b>Temperature (degree C)</b> 25.000                                      |                                      |  |                               |  |

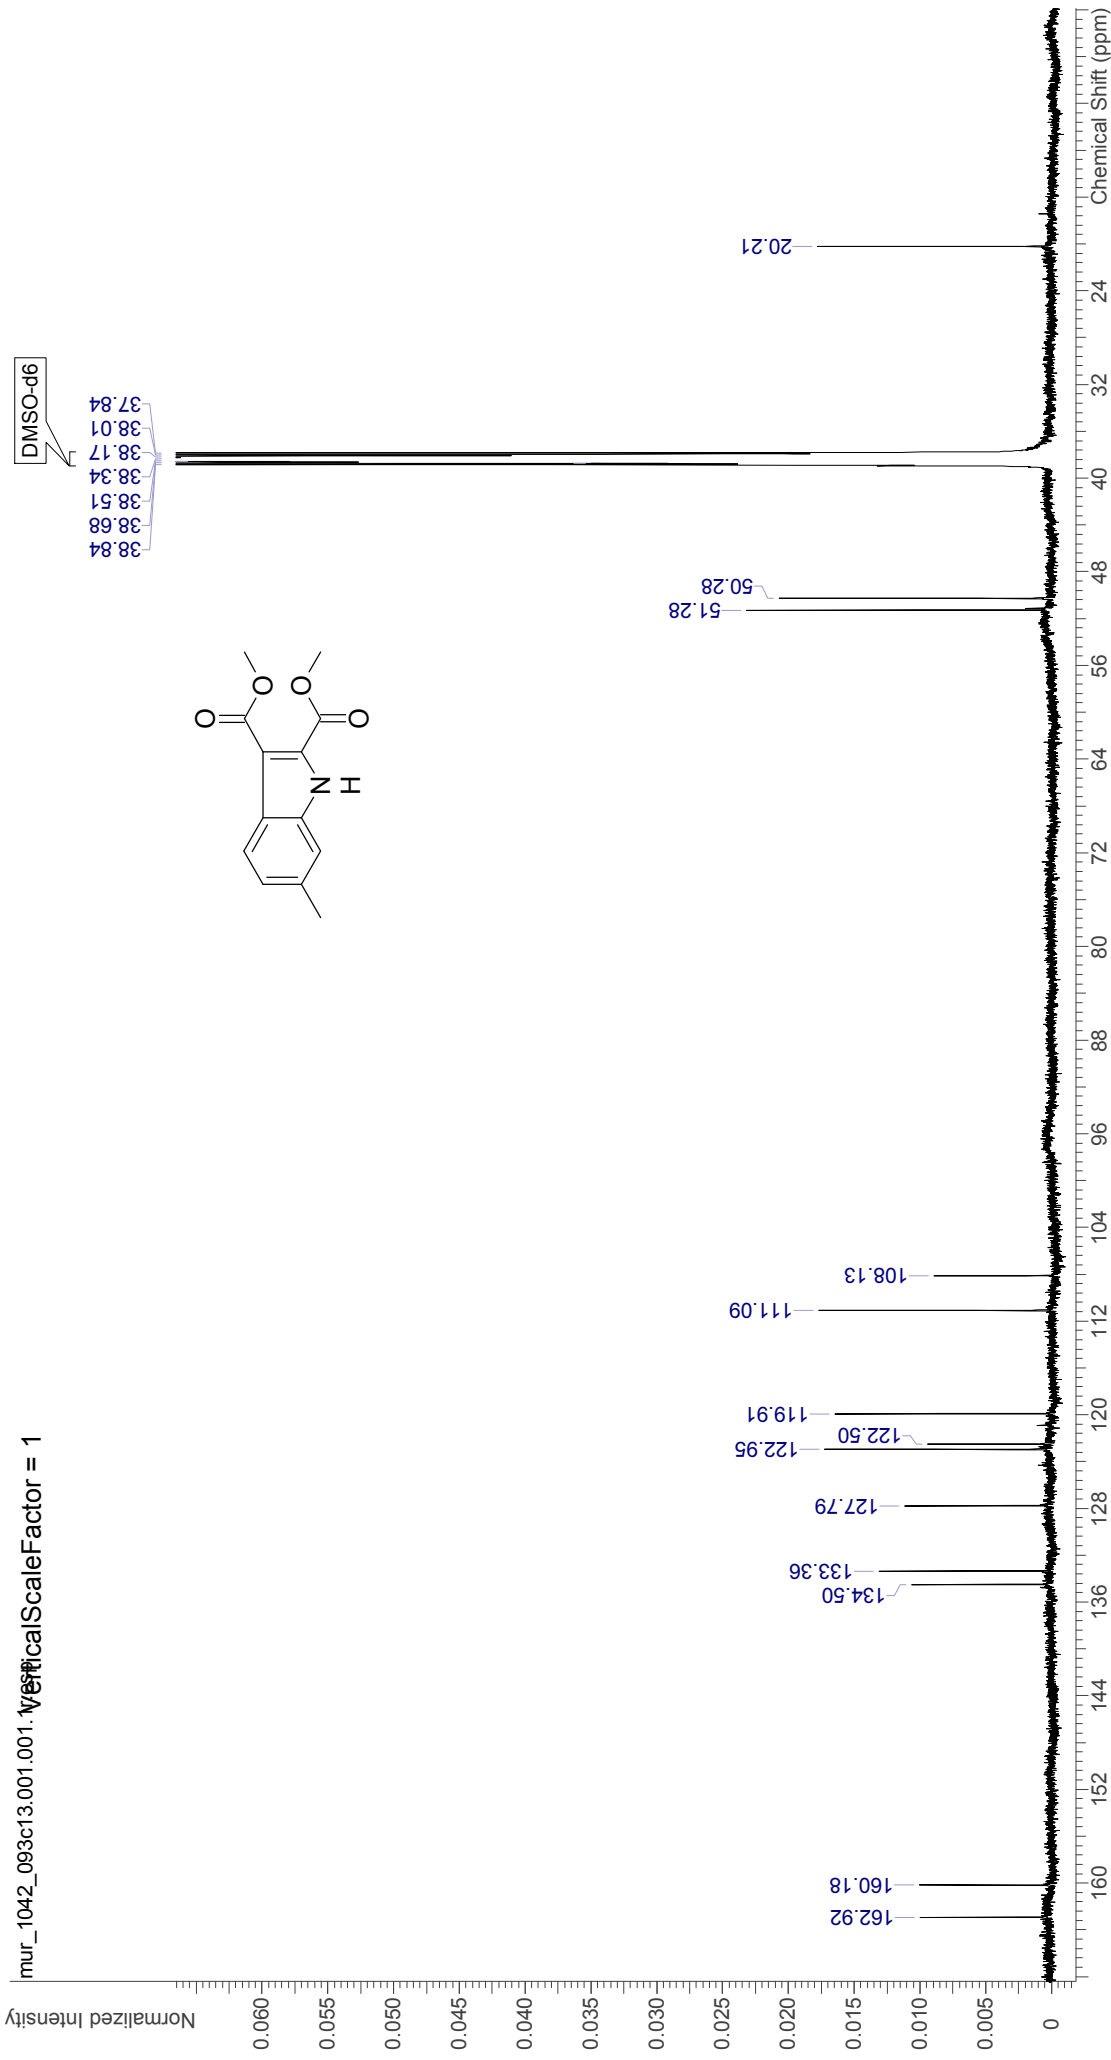

|                                                        |                                                                                  |                                       |  |                                |  |
|--------------------------------------------------------|----------------------------------------------------------------------------------|---------------------------------------|--|--------------------------------|--|
| <b>OriginalDateForRelativeTime</b> 2014-03-26T21:30:48 |                                                                                  | <b>Multiplets Integrals Sum</b> 9.08  |  | <b>Number of Nuclei</b> 10 H's |  |
| <b>Acquisition Time (sec)</b> 5.3084                   | <b>Comment</b> MUR_1042_095                                                      | <b>Date</b> 26 Mar 2014 21:30:48      |  |                                |  |
| <b>Date Stamp</b> 26 Mar 2014 21:30:48                 | <b>File Name</b> \\inbglab176164\ecm_2014\MUR\data\MED\mm\MUR_1042_09511\data11r | <b>Origin</b> av300                   |  |                                |  |
| <b>Frequency (MHz)</b> 300.13                          | <b>Nucleus</b> 1H                                                                | <b>Pulse Sequence</b> zg30            |  |                                |  |
| <b>Original Points Count</b> 32768                     | <b>Owner</b> administrator                                                       | <b>Spectrum Offset (Hz)</b> 1853.7059 |  |                                |  |
| <b>Receiver Gain</b> 1625.50                           | <b>SW(cyclical) (Hz)</b> 6172.84                                                 | <b>Solvent</b> DMSO-d6                |  |                                |  |
| <b>Spectrum Type</b> STANDARD                          | <b>Sweep Width (Hz)</b> 6172.65                                                  | <b>Temperature (degree C)</b> 25.000  |  |                                |  |

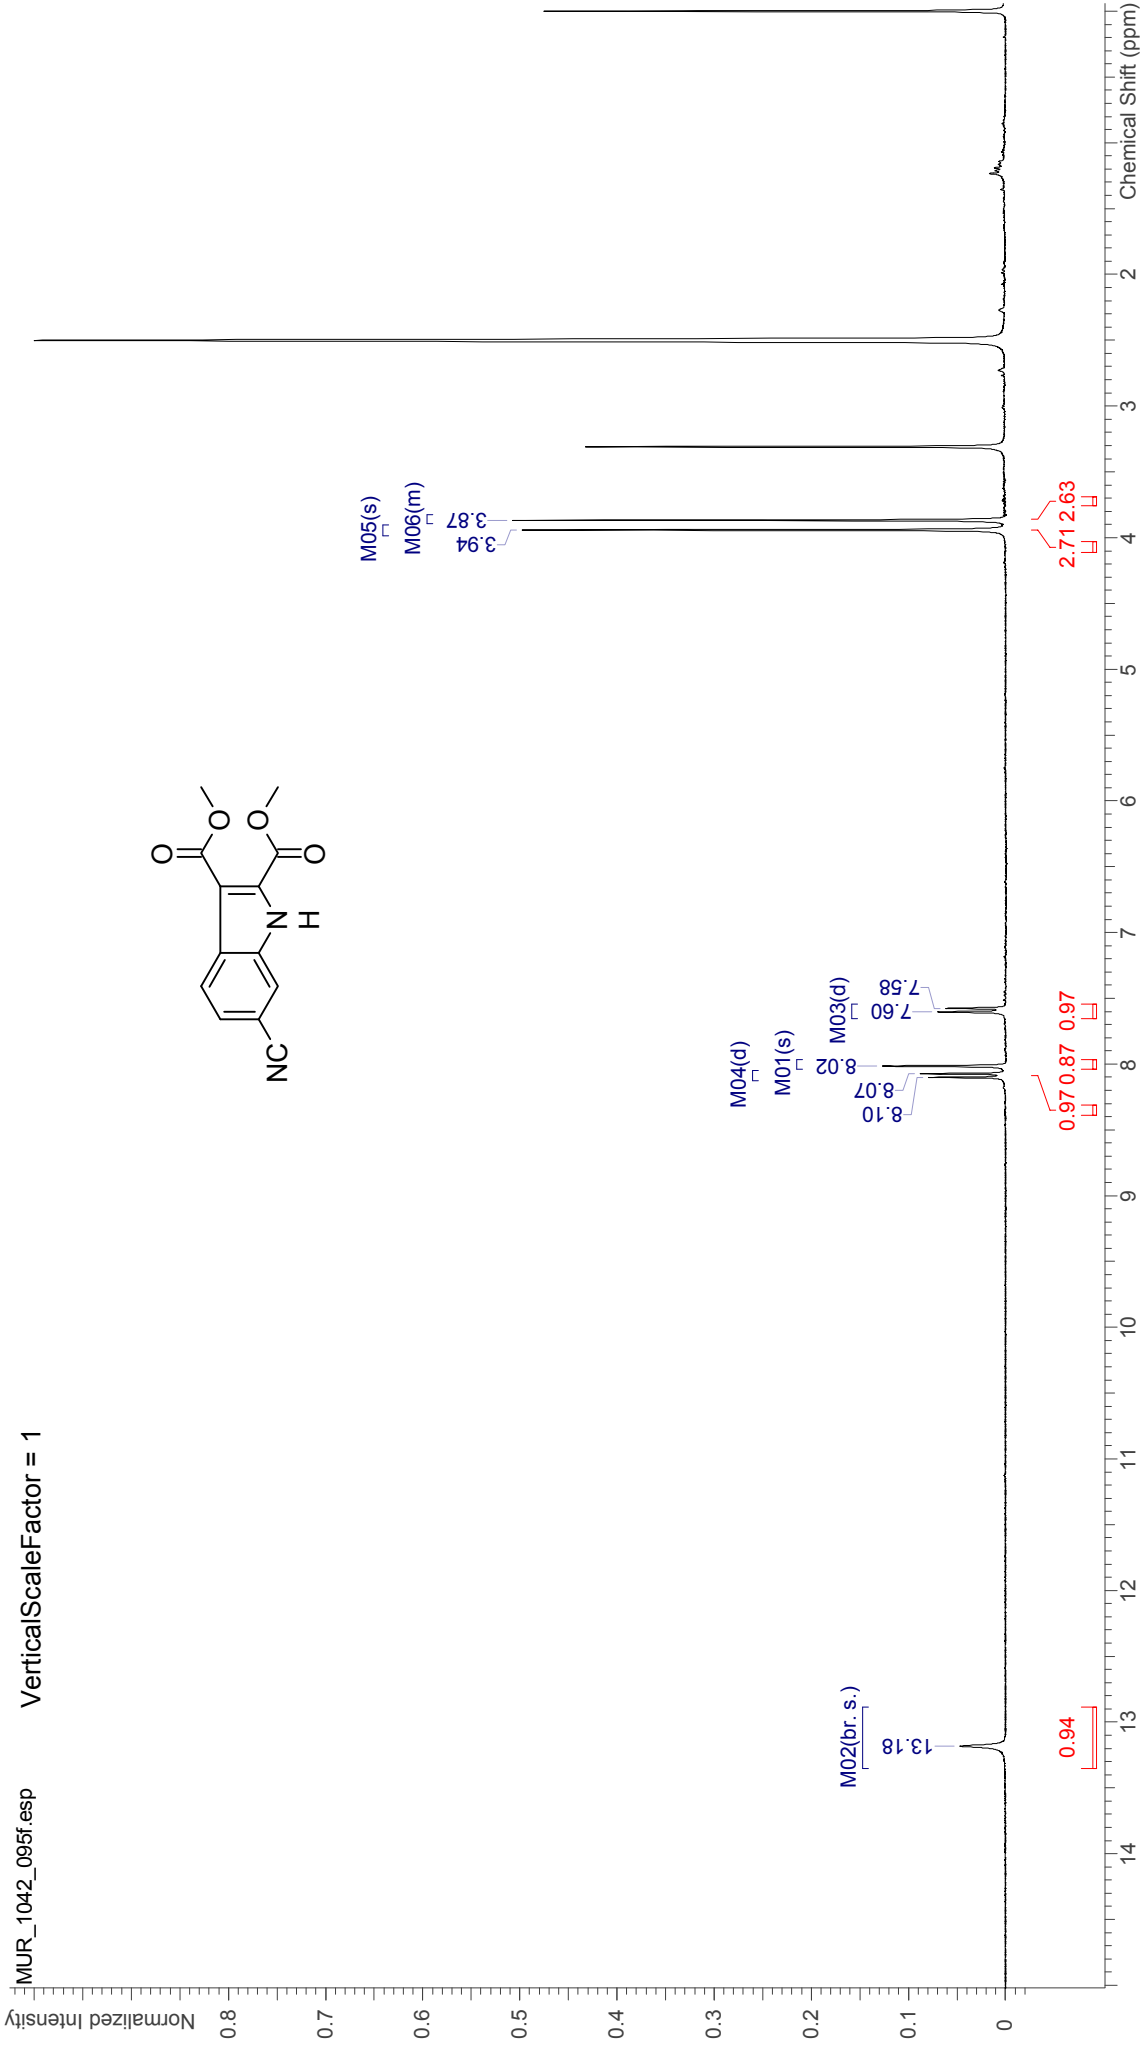

| OriginalDateForRelativeTime |                                                                    | 2014-04-04T13:13:44    |                                                            | Multiplets Integrals Sum |            | 0.00            |          | Number of Nuclei      |       | 0 C's         |          |
|-----------------------------|--------------------------------------------------------------------|------------------------|------------------------------------------------------------|--------------------------|------------|-----------------|----------|-----------------------|-------|---------------|----------|
| Acquisition Time (sec)      | 1.0912                                                             | Comment                | MUR_1042_095c13 C13CPD DMSO (F:\ecm\DATA\2014-04} bionmr 2 |                          |            |                 |          |                       |       |               |          |
| Date                        | 04 Apr 2014 13:13:44                                               |                        |                                                            |                          |            |                 |          |                       |       |               |          |
| File Name                   | C:\Users\kvjk299\Desktop\C13\29032014\mur_1042_095c13\1\pdata\1\1r |                        |                                                            |                          |            |                 |          |                       |       |               |          |
| Nucleus                     | 13C                                                                | Number of Transients   | 1217                                                       | Origin                   | spect      | Frequency (MHz) | 125.77   | Original Points Count | 32768 | Receiver Gain | 32768.00 |
| Owner                       | administrator                                                      | Points Count           | 32768                                                      | Pulse Sequence           | zpg930     | Spectrum Type   | STANDARD |                       |       |               |          |
| SW(cyclical) (Hz)           | 30030.03                                                           | Solvent                | DMSO-d6                                                    | Spectrum Offset (Hz)     | 12649.1699 |                 |          |                       |       |               |          |
| Sweep Width (Hz)            | 30029.11                                                           | Temperature (degree C) | 25.000                                                     |                          |            |                 |          |                       |       |               |          |

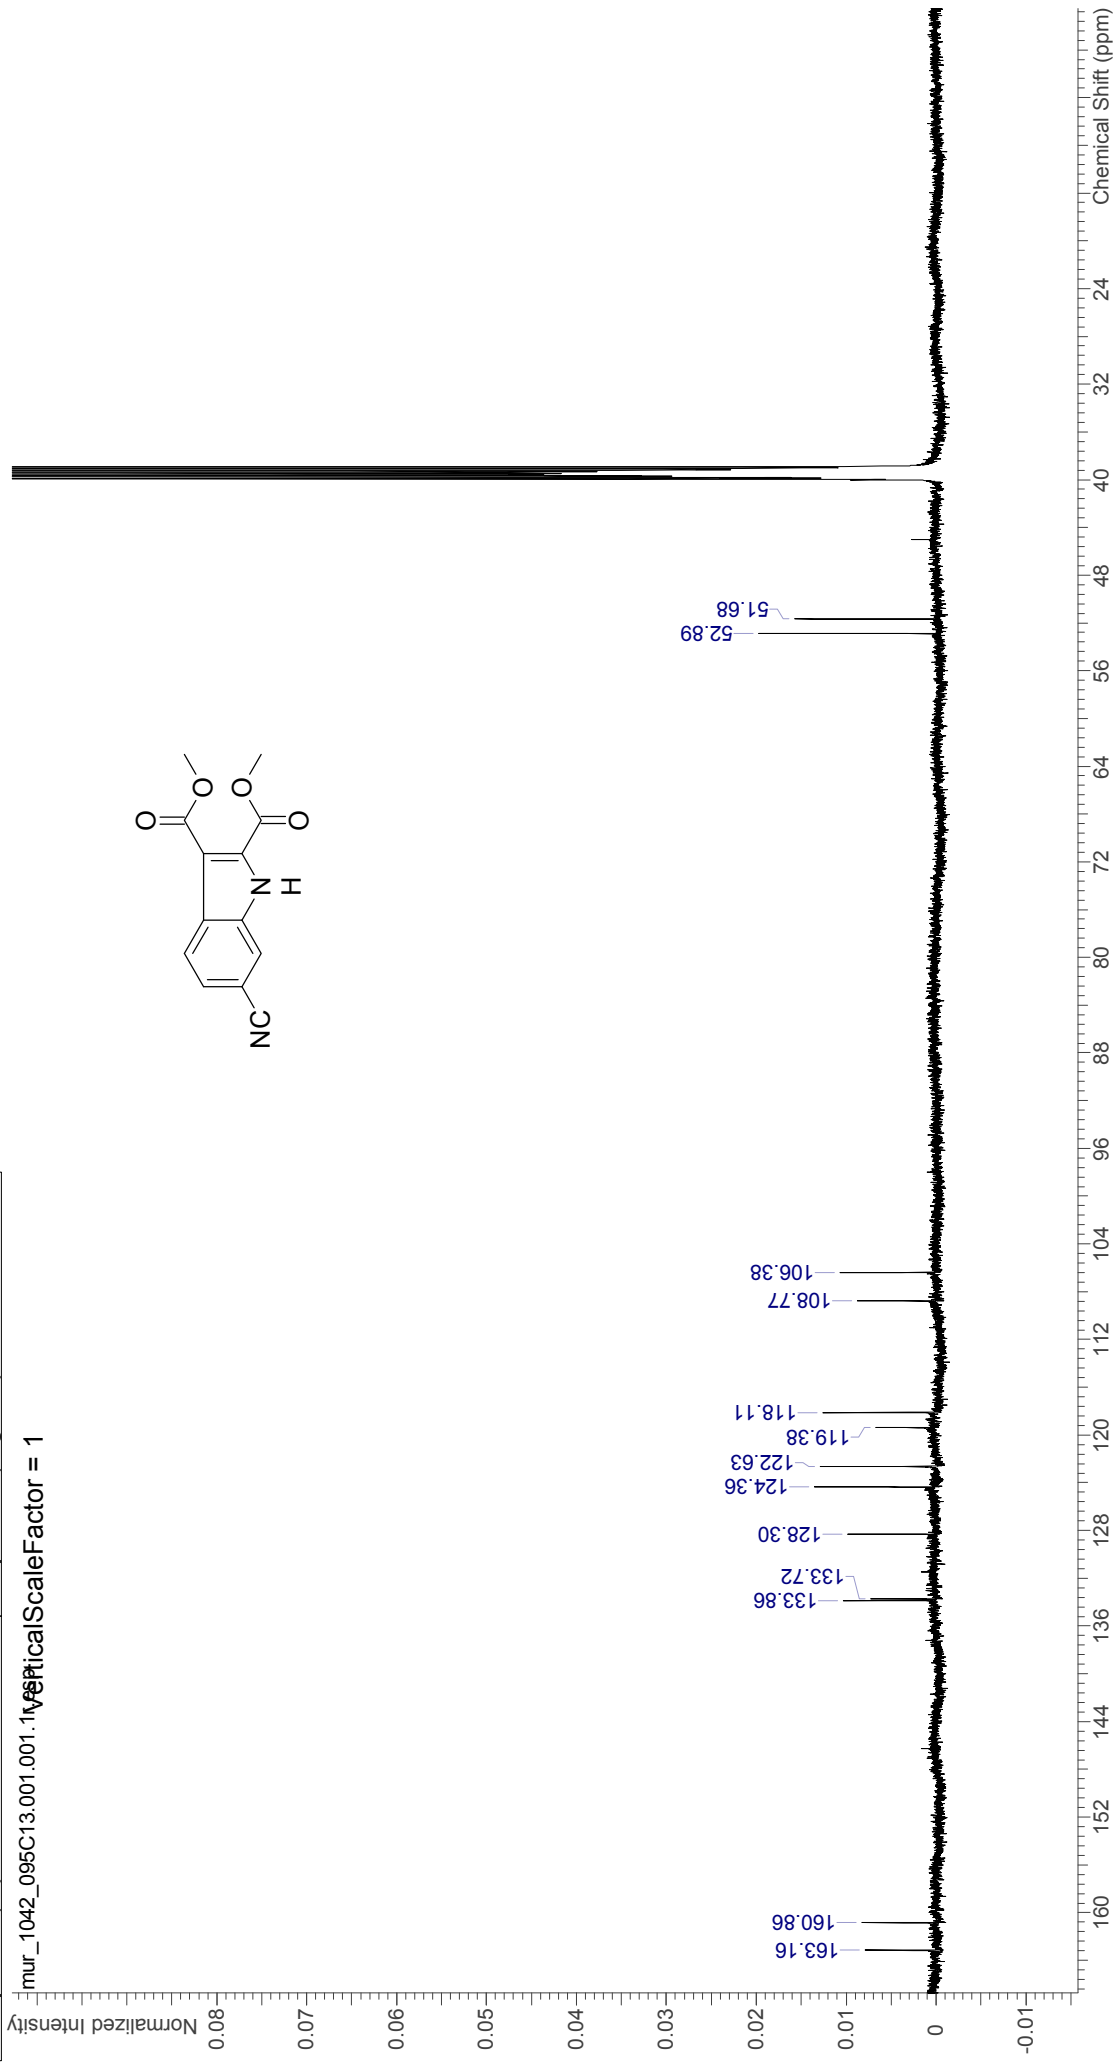

mur\_1042\_095c13.001.001.1\VerticalScaleFactor = 1



|                                                        |                                                                                   |                                       |  |                                |  |
|--------------------------------------------------------|-----------------------------------------------------------------------------------|---------------------------------------|--|--------------------------------|--|
| <b>OriginalDateForRelativeTime</b> 2014-03-26T21:11:36 |                                                                                   | <b>Multiplets Integrals Sum</b> 13.10 |  | <b>Number of Nuclei</b> 13 H's |  |
| <b>Acquisition Time (sec)</b> 5.3084                   | <b>Comment</b> MUR_1042_094                                                       | <b>Date</b> 26 Mar 2014 21:11:36      |  |                                |  |
| <b>Date Stamp</b> 26 Mar 2014 21:11:36                 | <b>File Name</b> \\inbglab176164\ecm_2014\MUR\data\med\mm\MUR_1042_09411\data111r | <b>Origin</b> av300                   |  |                                |  |
| <b>Frequency (MHz)</b> 300.13                          | <b>Nucleus</b> 1H                                                                 | <b>Pulse Sequence</b> zg30            |  |                                |  |
| <b>Original Points Count</b> 32768                     | <b>Owner</b> administrator                                                        | <b>Spectrum Offset (Hz)</b> 1853.5978 |  |                                |  |
| <b>Receiver Gain</b> 1625.50                           | <b>SW(cyclical) (Hz)</b> 6172.84                                                  | <b>Temperature (degree C)</b> 25.000  |  |                                |  |
| <b>Spectrum Type</b> STANDARD                          | <b>Sweep Width (Hz)</b> 6172.65                                                   |                                       |  |                                |  |

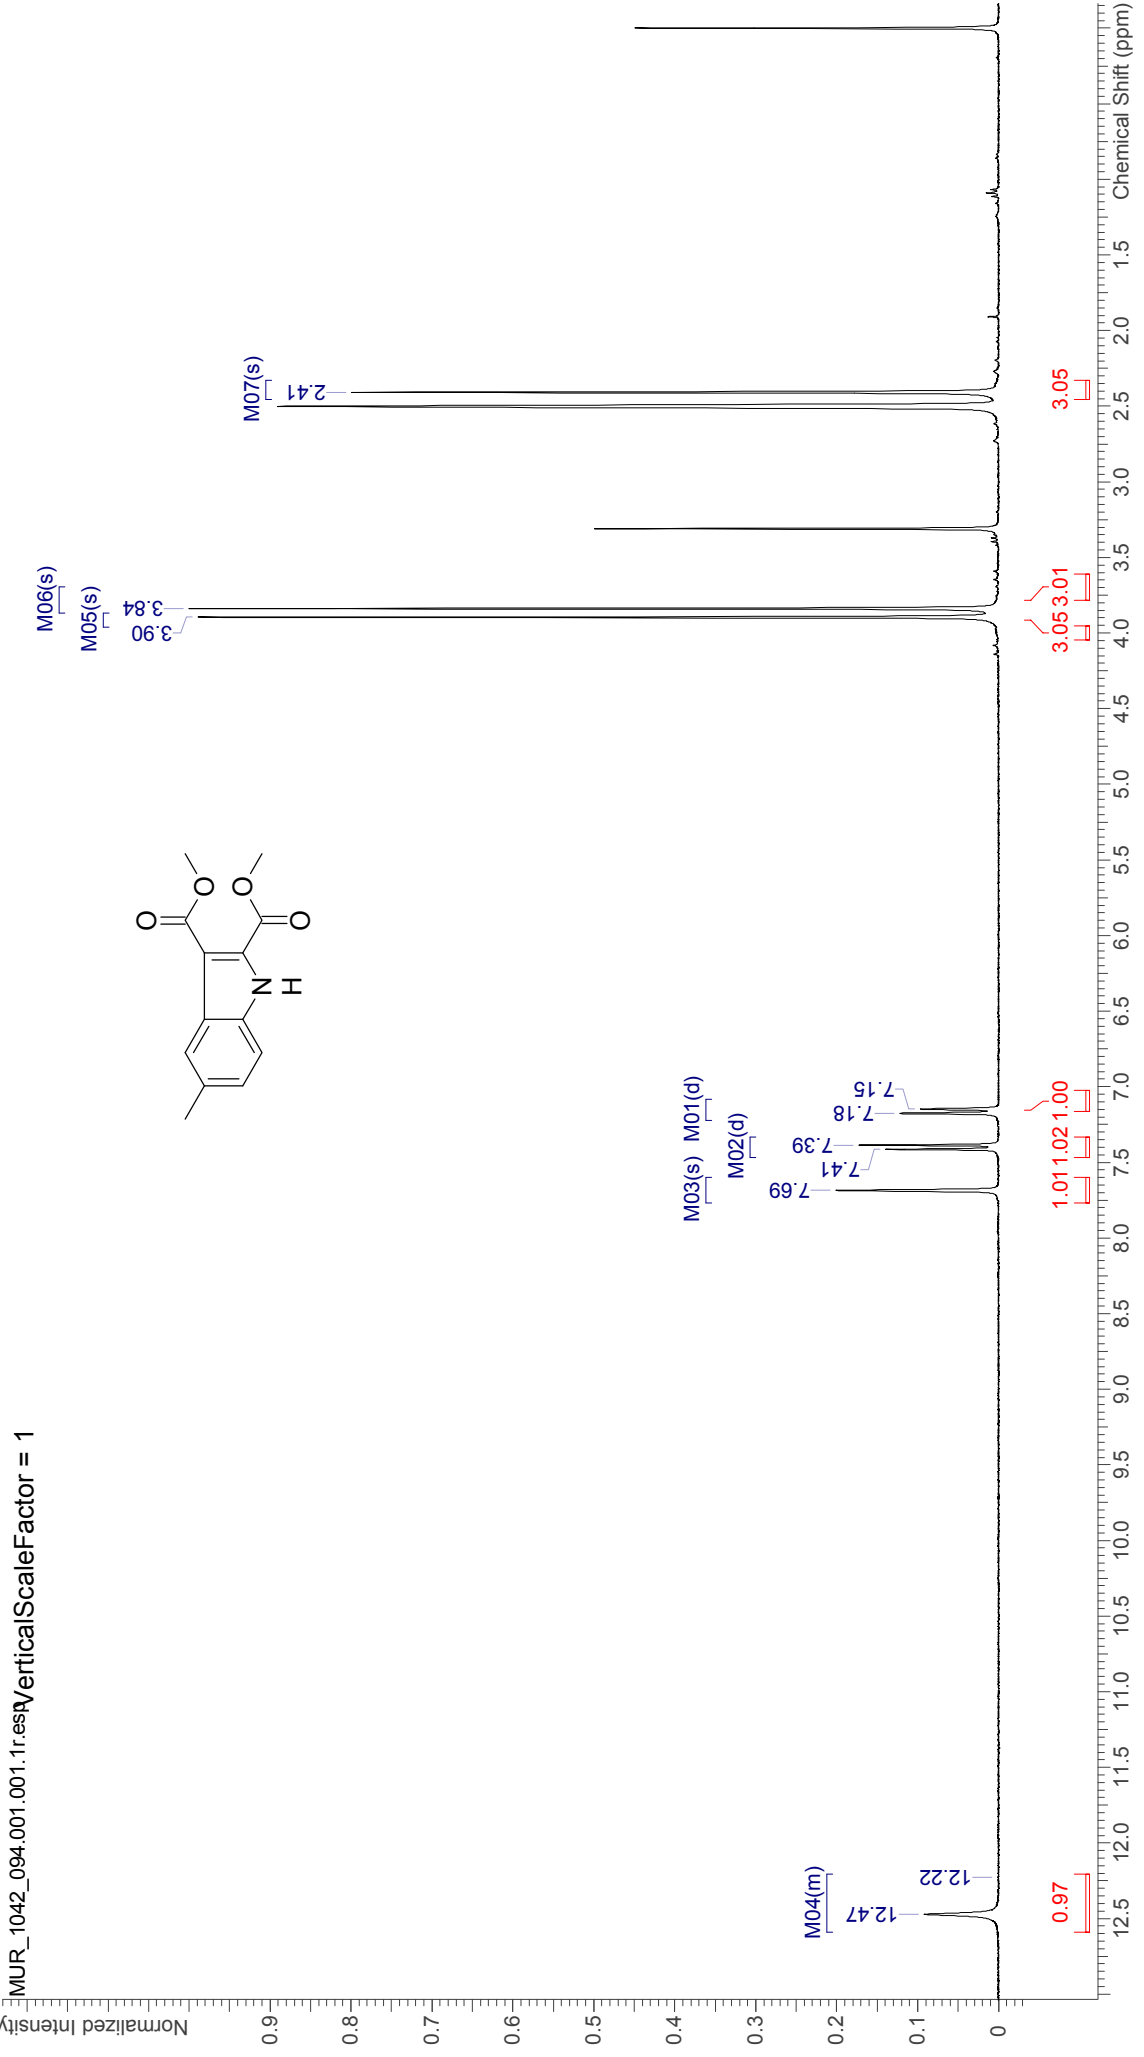

| OriginalDateForRelativeTime | 2014-03-30T13:20:08                                              | Multiplets Integrals Sum | 0.00                                                     | Number of Nuclei      | 0 C's    |
|-----------------------------|------------------------------------------------------------------|--------------------------|----------------------------------------------------------|-----------------------|----------|
| Acquisition Time (sec)      | 1.0912                                                           | Comment                  | MUR_1042_094 C-13CPD DMSO (F:\ecm\DATA\2013-11} bionmr 5 |                       |          |
| Date                        | 30 Mar 2014 13:20:08                                             | Date Stamp               | 30 Mar 2014 13:20:08                                     |                       |          |
| File Name                   | C:\Users\kvjk299\Desktop\C13\recent c13\MUR_1042_094\1\pdata\11r | Origin                   | spect                                                    | Frequency (MHz)       | 125.77   |
| Nucleus                     | 13C                                                              | Number of Transients     | 2000                                                     | Original Points Count | 32768    |
| Owner                       | administrator                                                    | Points Count             | 32768                                                    | Receiver Gain         | 32768.00 |
| SW(cyclical) (Hz)           | 30030.03                                                         | Solvent                  | DMSO-d6                                                  | Spectrum Type         | STANDARD |
| Sweep Width (Hz)            | 30029.11                                                         | Temperature (degree C)   | 25.000                                                   |                       |          |

MUR\_1042\_094.001.001.1r.es\VerticalScaleFactor = 1

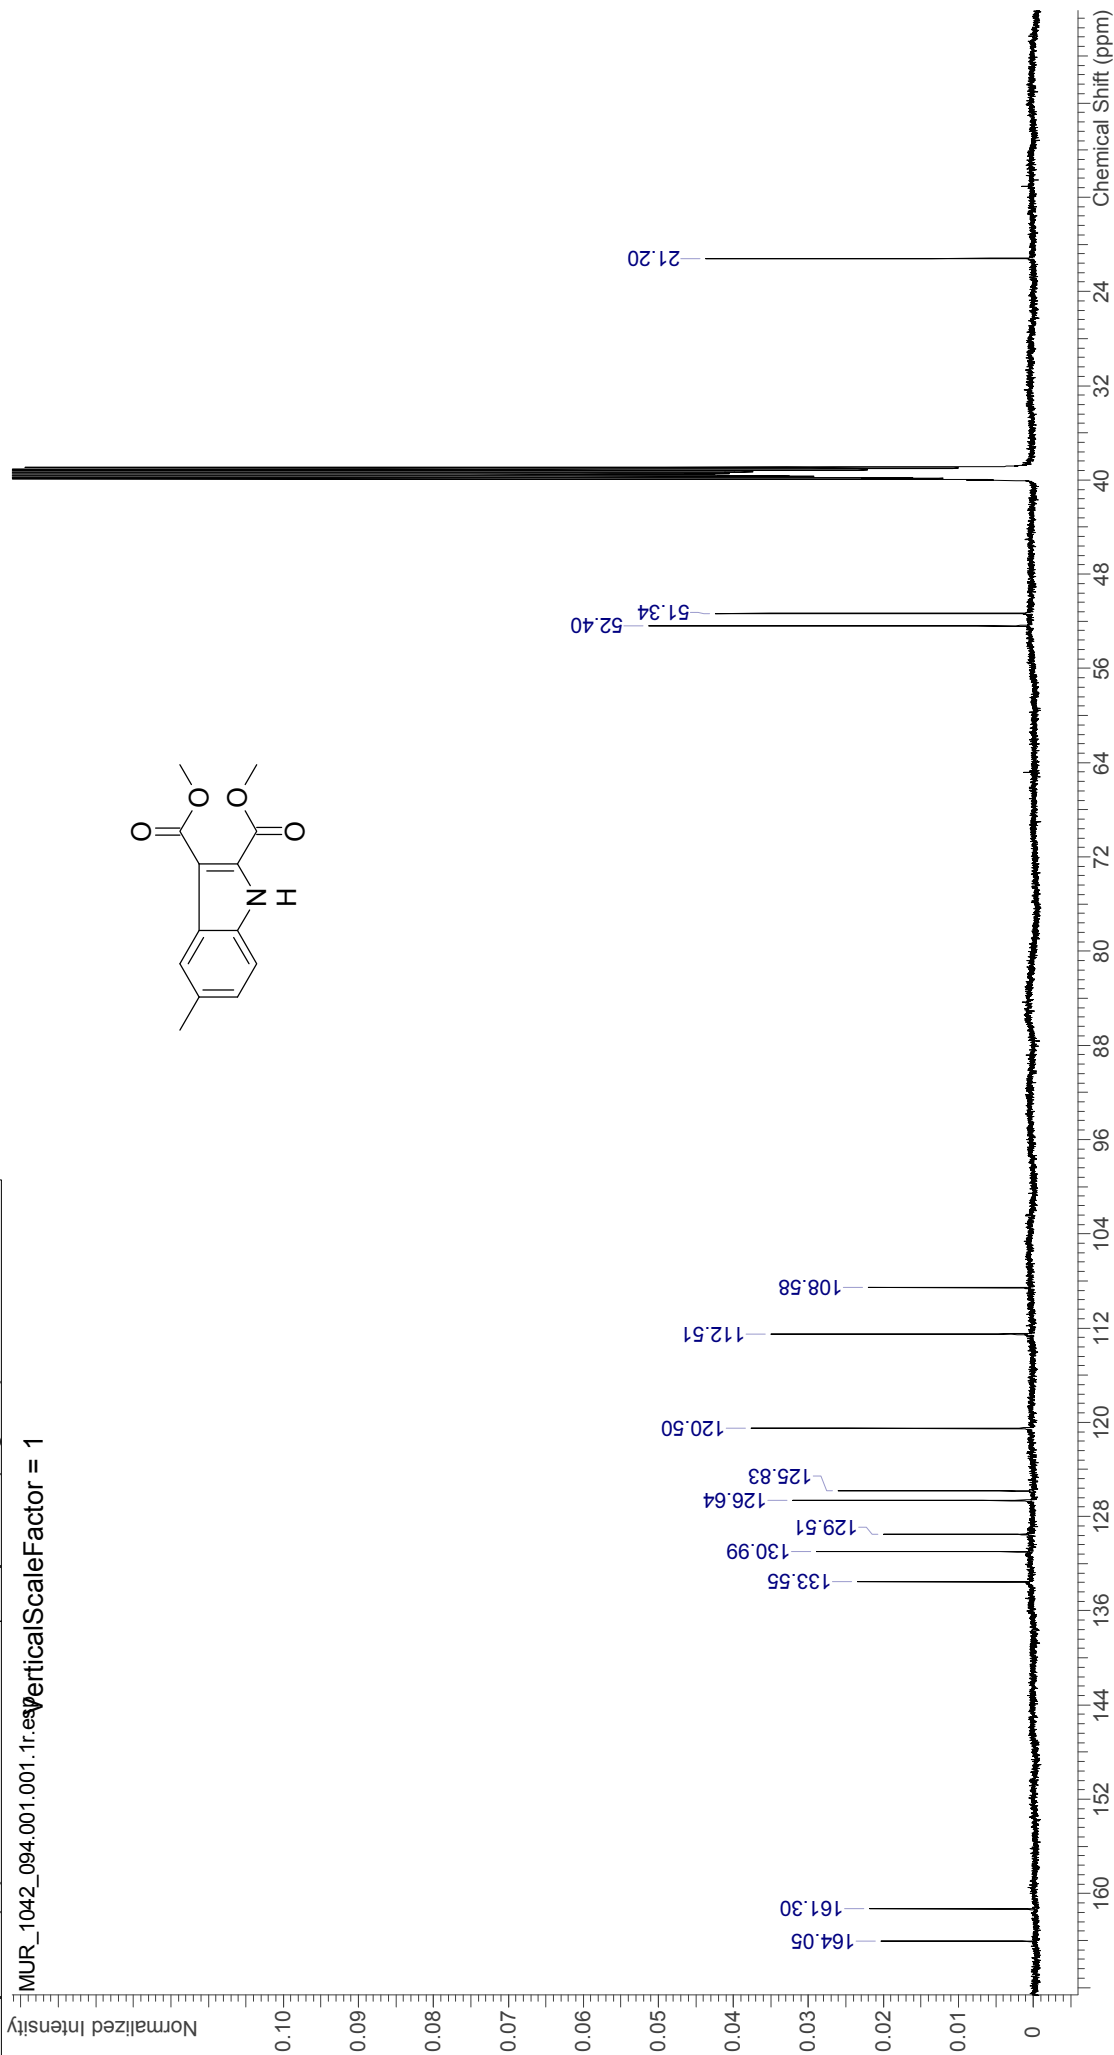

| OriginalDateForRelativeTime |                      | 2014-03-30T17:04:08 |               | Multiplets Integrals Sum |                                                                 | 10.20                |           | Number of Nuclei |  | 10 H's |  |
|-----------------------------|----------------------|---------------------|---------------|--------------------------|-----------------------------------------------------------------|----------------------|-----------|------------------|--|--------|--|
| Acquisition Time (sec)      | 5.3084               | Comment             | MUR_1042_101  | Date                     | 30 Mar 2014 17:04:08                                            |                      |           |                  |  |        |  |
| Date Stamp                  | 30 Mar 2014 17:04:08 | Nucleus             | 1H            | File Name                | \\inbglab176164\ecm_2014\MUR\data\med\mm\MUR_1042_10111\data11r |                      |           |                  |  |        |  |
| Frequency (MHz)             | 300.13               | Owner               | administrator | Number of Transients     | 256                                                             | Origin               | av300     |                  |  |        |  |
| Original Points Count       | 32768                | SW(cyclical) (Hz)   | 6172.84       | Points Count             | 32768                                                           | Pulse Sequence       | zg30      |                  |  |        |  |
| Receiver Gain               | 1625.50              | Sweep Width (Hz)    | 6172.65       | Solvent                  | DMSO-d6                                                         | Spectrum Offset (Hz) | 1853.2766 |                  |  |        |  |
| Spectrum Type               | STANDARD             |                     |               | Temperature (degree C)   | 25.000                                                          |                      |           |                  |  |        |  |

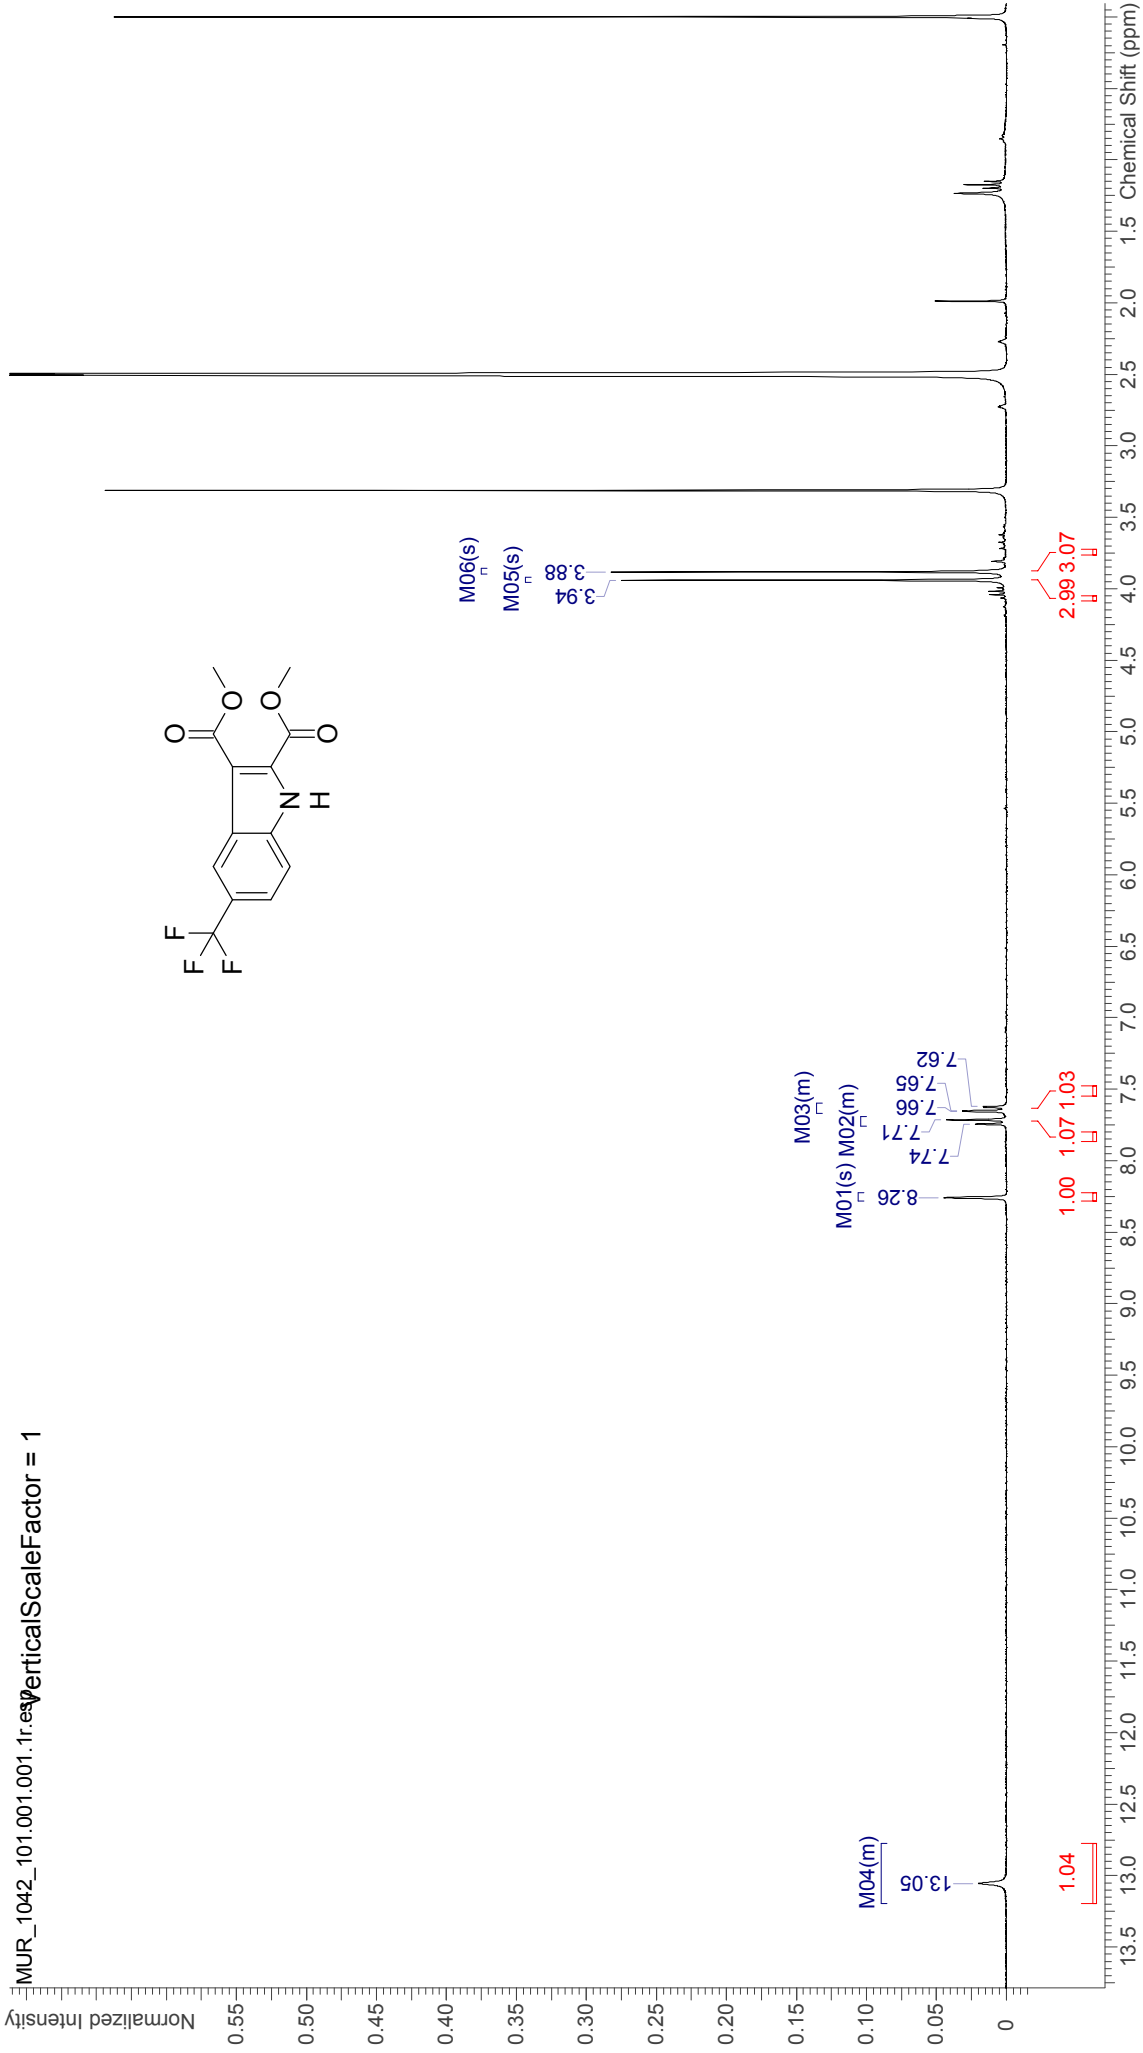

| OriginalDateForRelativeTime | 2014-04-21T07:26:00  | Multiplets Integrals Sum | 0.00                                       | Number of Nuclei     | 0 C's                                                                |
|-----------------------------|----------------------|--------------------------|--------------------------------------------|----------------------|----------------------------------------------------------------------|
| Acquisition Time (sec)      | 1.0912               | Comment                  | C13CPD DMSO (F:\ecm\DATA\2014-04} bionmr 4 | Date                 | 21 Apr 2014 07:26:00                                                 |
| Date Stamp                  | 21 Apr 2014 07:26:00 | Nucleus                  | 13C                                        | File Name            | \\inbgrdsfp01\ELN\data\MUR\MURUGAN-CARBONMUR_1042_101F\11\PDATA\111r |
| Frequency (MHz)             | 125.77               | Owner                    | administrator                              | Number of Transients | 12000                                                                |
| Original Points Count       | 32768                | SW(cyclical) (Hz)        | 30030.03                                   | Points Count         | 32768                                                                |
| Receiver Gain               | 32768.00             | Sweep Width (Hz)         | 30029.11                                   | Solvent              | DMSO-d6                                                              |
| Spectrum Type               | STANDARD             | Temperature (degree C)   | 25.000                                     | Pulse Sequence       | zpgg30                                                               |
|                             |                      |                          |                                            | Spectrum Offset (Hz) | 12518.3926                                                           |

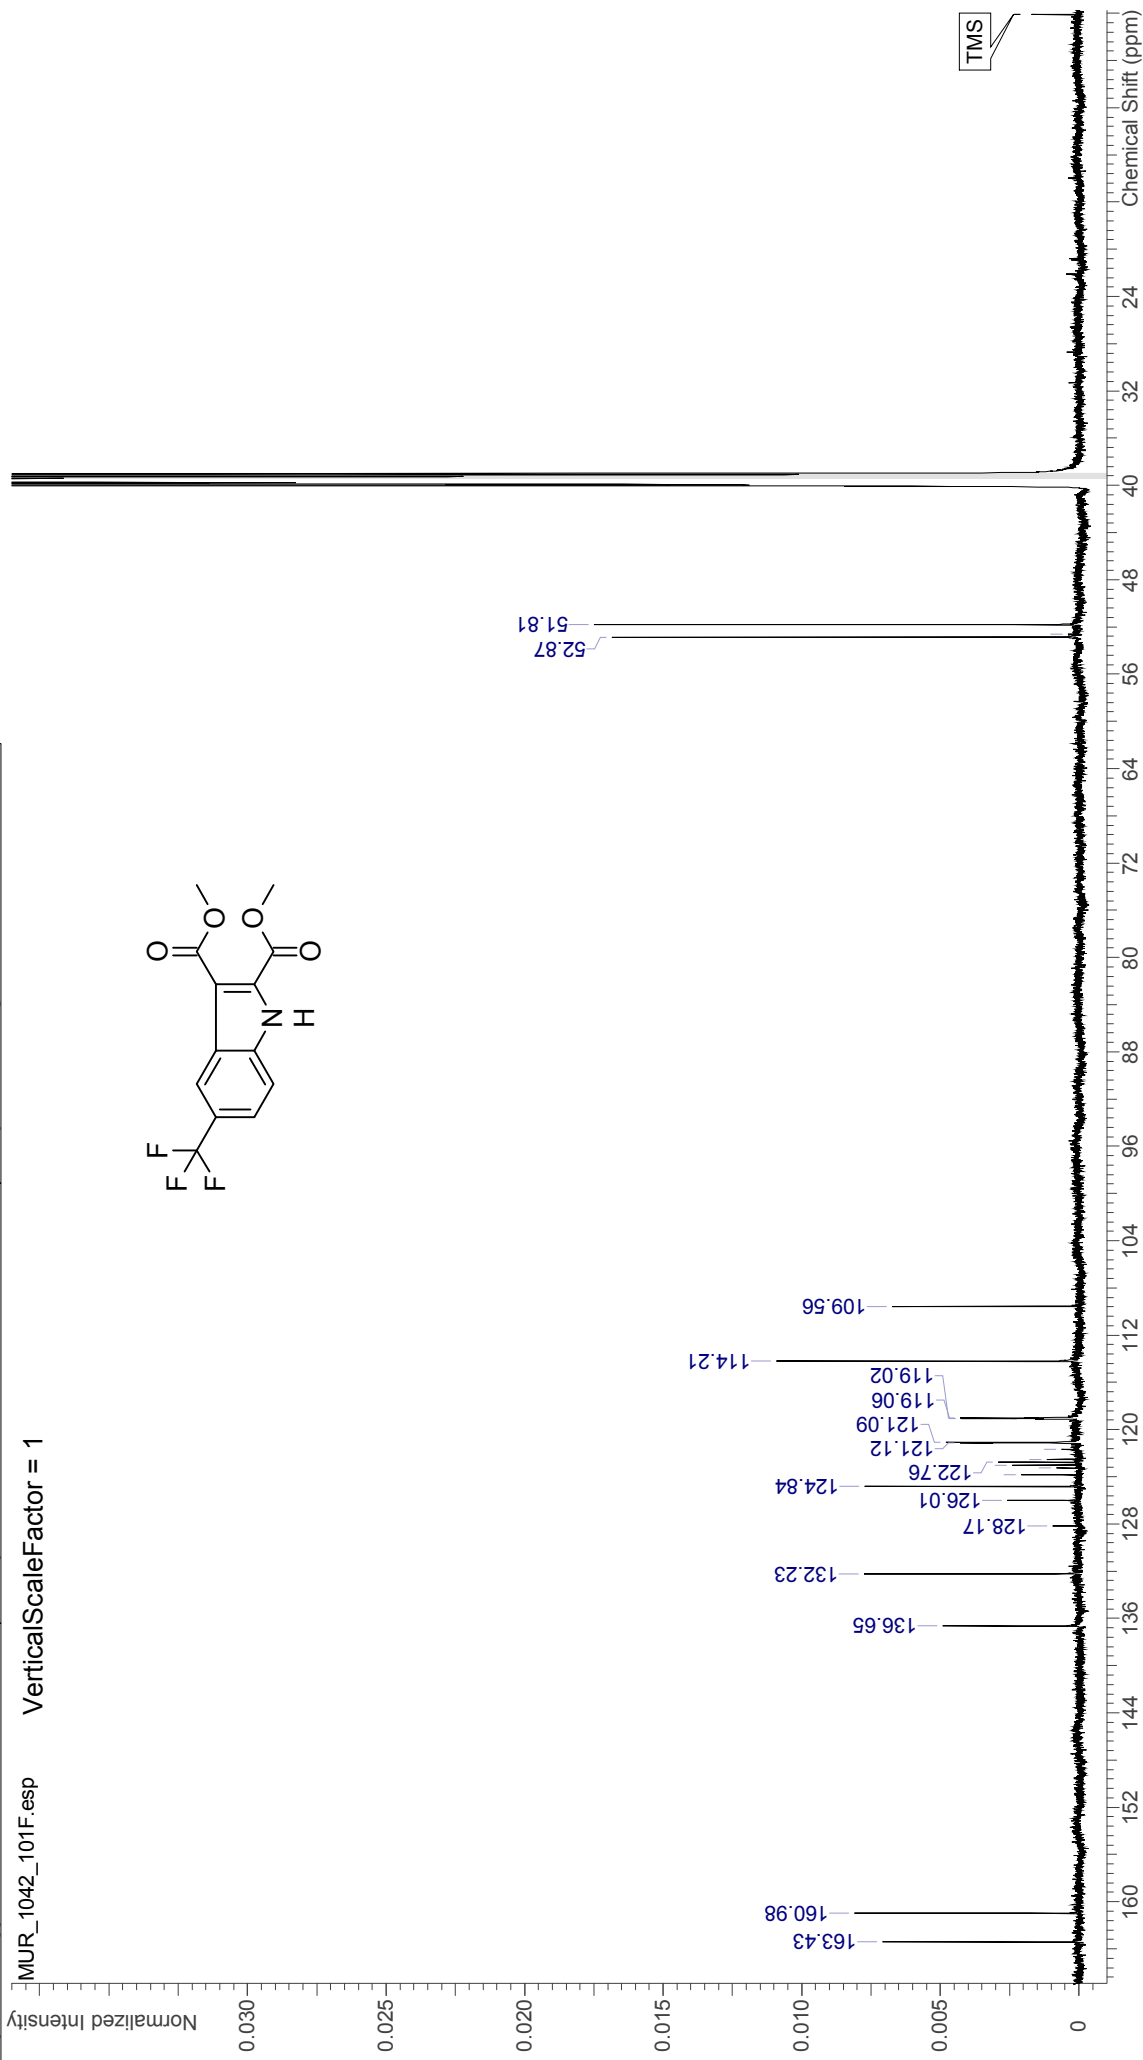

|                                                        |                                                                               |                                       |  |                                |  |
|--------------------------------------------------------|-------------------------------------------------------------------------------|---------------------------------------|--|--------------------------------|--|
| <b>OriginalDateForRelativeTime</b> 2014-03-27T21:00:56 |                                                                               | <b>Multiplets Integrals Sum</b> 15.78 |  | <b>Number of Nuclei</b> 15 H's |  |
| <b>Acquisition Time (sec)</b> 5.3084                   | <b>Comment</b> MUR_1042_100                                                   | <b>Date</b> 27 Mar 2014 21:00:56      |  |                                |  |
| <b>Date Stamp</b> 27 Mar 2014 21:00:56                 | <b>File Name</b> \\inbglab176164\ecm_2014\MUR\data\med\MUR_1042_1001\pdata11r |                                       |  |                                |  |
| <b>Frequency (MHz)</b> 300.13                          | <b>Nucleus</b> 1H                                                             | <b>Origin</b> av300                   |  |                                |  |
| <b>Original Points Count</b> 32768                     | <b>Owner</b> administrator                                                    | <b>Pulse Sequence</b> zg30            |  |                                |  |
| <b>Receiver Gain</b> 1625.50                           | <b>SW(cyclical) (Hz)</b> 6172.84                                              | <b>Spectrum Offset (Hz)</b> 1853.8079 |  |                                |  |
| <b>Spectrum Type</b> STANDARD                          | <b>Sweep Width (Hz)</b> 6172.65                                               | <b>Temperature (degree C)</b> 25.000  |  |                                |  |

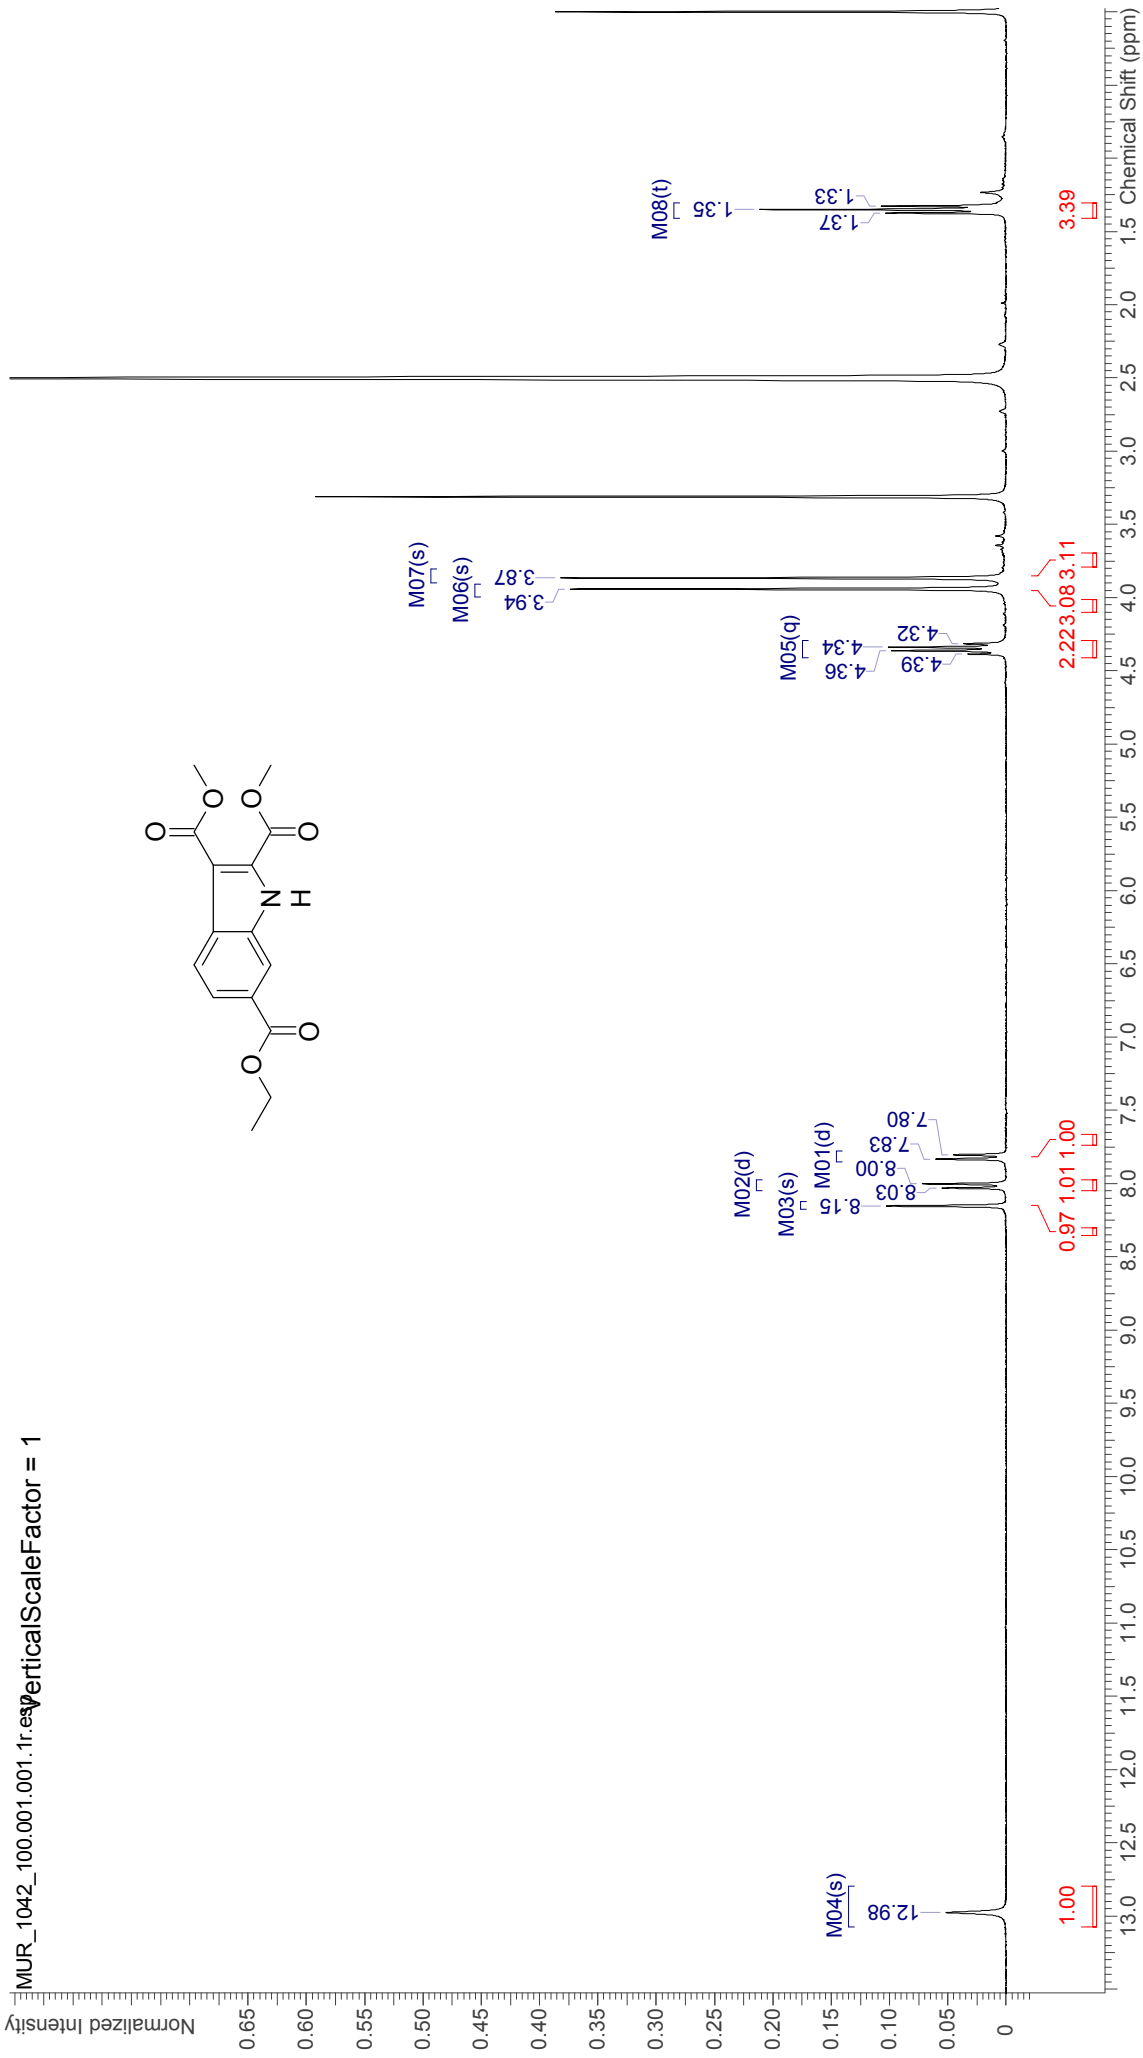

|                                                                                    |                                                                           |                                      |  |                               |  |
|------------------------------------------------------------------------------------|---------------------------------------------------------------------------|--------------------------------------|--|-------------------------------|--|
| <b>OriginalDateForRelativeTime</b> 2014-04-04T17:14:48                             |                                                                           | <b>Multiplets Integrals Sum</b> 0.00 |  | <b>Number of Nuclei</b> 0 C's |  |
| <b>Acquisition Time (sec)</b> 1.0912                                               | <b>Comment</b> MUR_1042_100C13 C13CPD DMSO (F:\ecm\DATA\2014-04} bionmr 3 |                                      |  |                               |  |
| <b>Date</b> 04 Apr 2014 17:14:48                                                   | <b>Date Stamp</b> 04 Apr 2014 17:14:48                                    |                                      |  |                               |  |
| <b>File Name</b> C:\Users\kvjk299\Desktop\C13\29032014\mur_1042_100c13\1\pdata\11r | <b>Origin</b> spect                                                       | <b>Frequency (MHz)</b> 125.77        |  |                               |  |
| <b>Nucleus</b> 13C                                                                 | <b>Number of Transients</b> 3280                                          | <b>Original Points Count</b> 32768   |  |                               |  |
| <b>Owner</b> administrator                                                         | <b>Points Count</b> 32768                                                 | <b>Receiver Gain</b> 32768.00        |  |                               |  |
| <b>SW(cyclical) (Hz)</b> 30030.03                                                  | <b>Solvent</b> DMSO-d6                                                    | <b>Spectrum Type</b> STANDARD        |  |                               |  |
| <b>Sweep Width (Hz)</b> 30029.11                                                   | <b>Temperature (degree C)</b> 25.000                                      |                                      |  |                               |  |

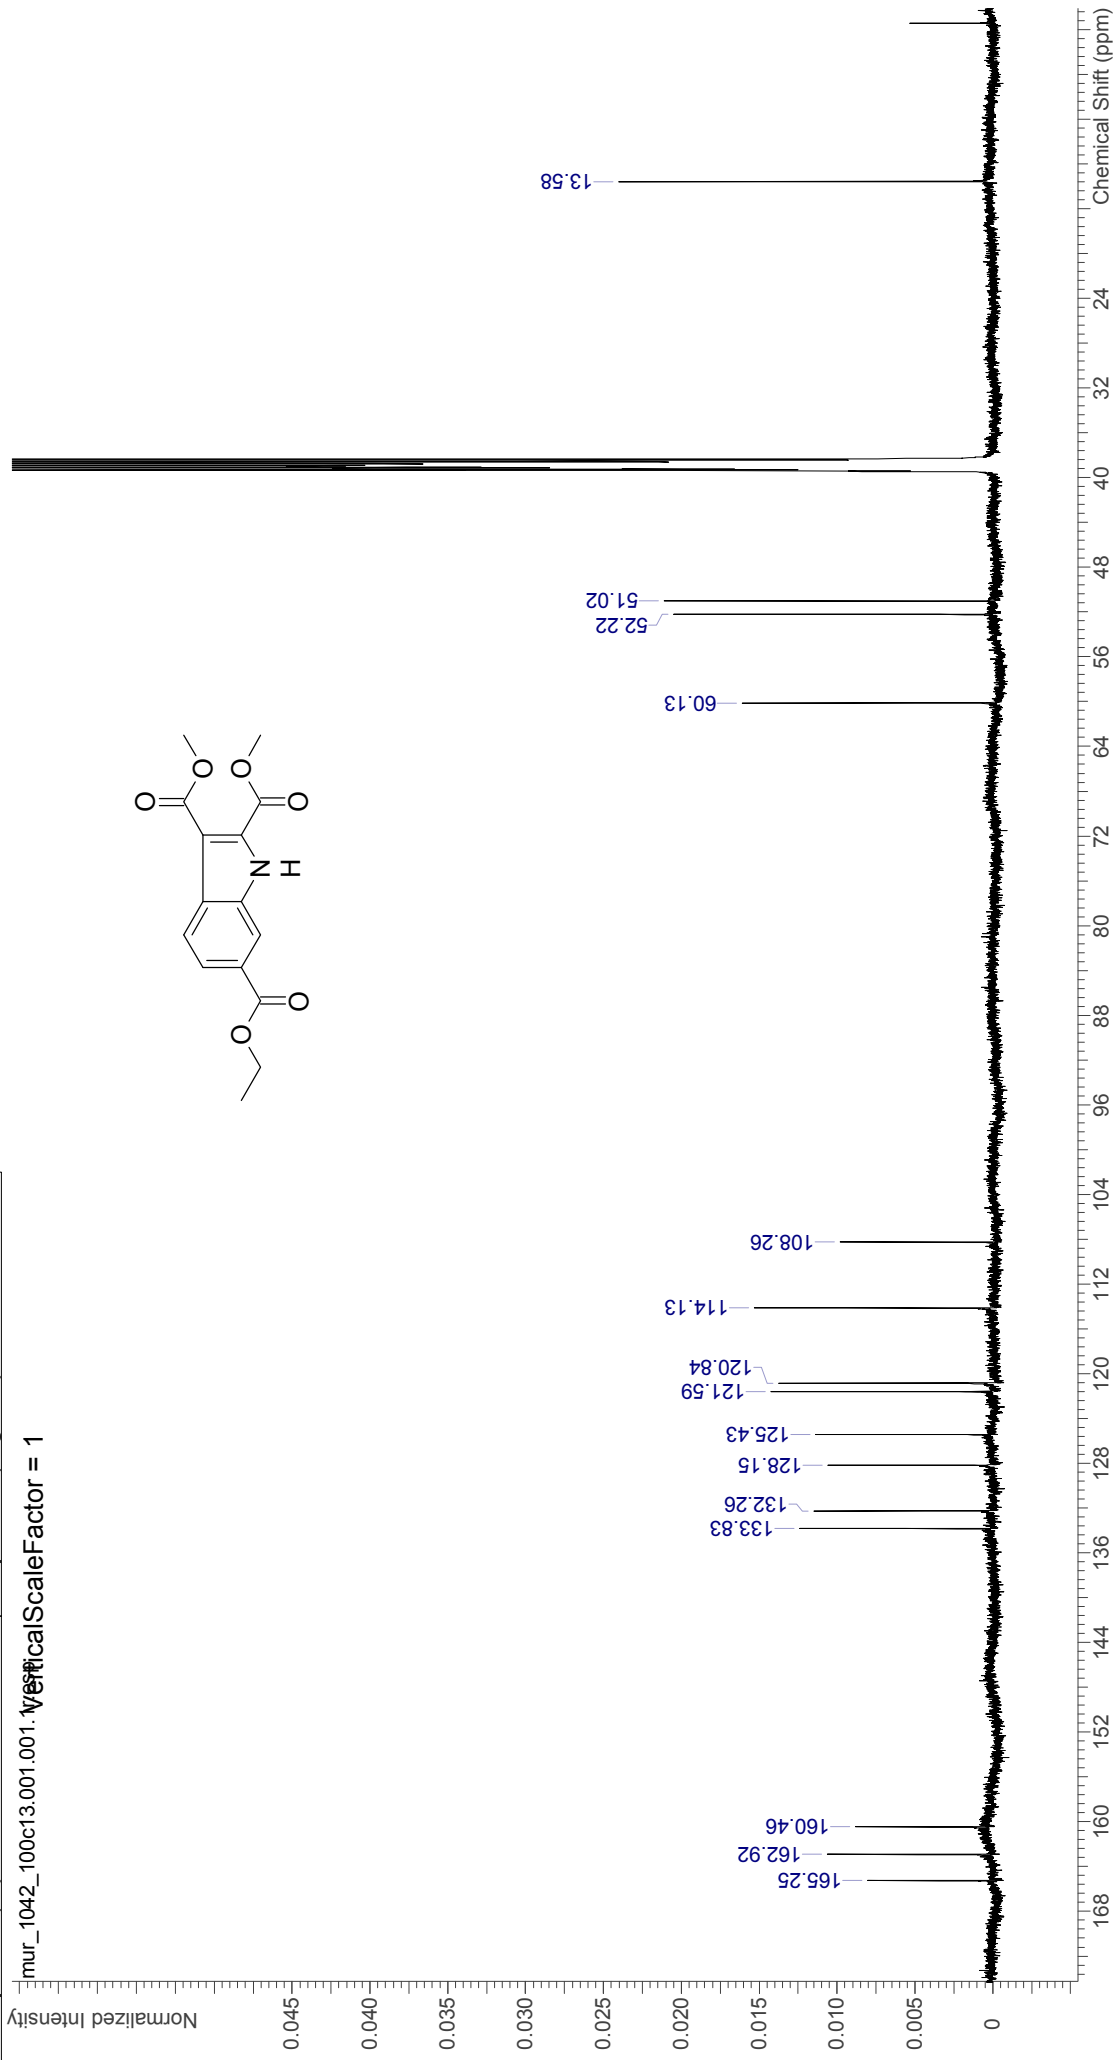

mur\_1042\_100c13.001.001.VerticalScaleFactor = 1

|                                                        |                                                                                  |                                       |  |                                |  |
|--------------------------------------------------------|----------------------------------------------------------------------------------|---------------------------------------|--|--------------------------------|--|
| <b>OriginalDateForRelativeTime</b> 2014-03-26T21:52:08 |                                                                                  | <b>Multiplets Integrals Sum</b> 9.93  |  | <b>Number of Nuclei</b> 10 H's |  |
| <b>Acquisition Time (sec)</b> 5.3084                   | <b>Comment</b> MUR_1042_097                                                      | <b>Date</b> 26 Mar 2014 21:52:08      |  |                                |  |
| <b>Date Stamp</b> 26 Mar 2014 21:52:08                 | <b>File Name</b> \\inbglab176164\ecm_2014\MUR\data\MED\mm\MUR_1042_09711\data11r | <b>Origin</b> av300                   |  |                                |  |
| <b>Frequency (MHz)</b> 300.13                          | <b>Nucleus</b> 1H                                                                | <b>Pulse Sequence</b> zg30            |  |                                |  |
| <b>Original Points Count</b> 32768                     | <b>Owner</b> administrator                                                       | <b>Spectrum Offset (Hz)</b> 1853.9131 |  |                                |  |
| <b>Receiver Gain</b> 1625.50                           | <b>SW(cyclical) (Hz)</b> 6172.84                                                 | <b>Temperature (degree C)</b> 25.000  |  |                                |  |
| <b>Spectrum Type</b> STANDARD                          | <b>Sweep Width (Hz)</b> 6172.65                                                  |                                       |  |                                |  |

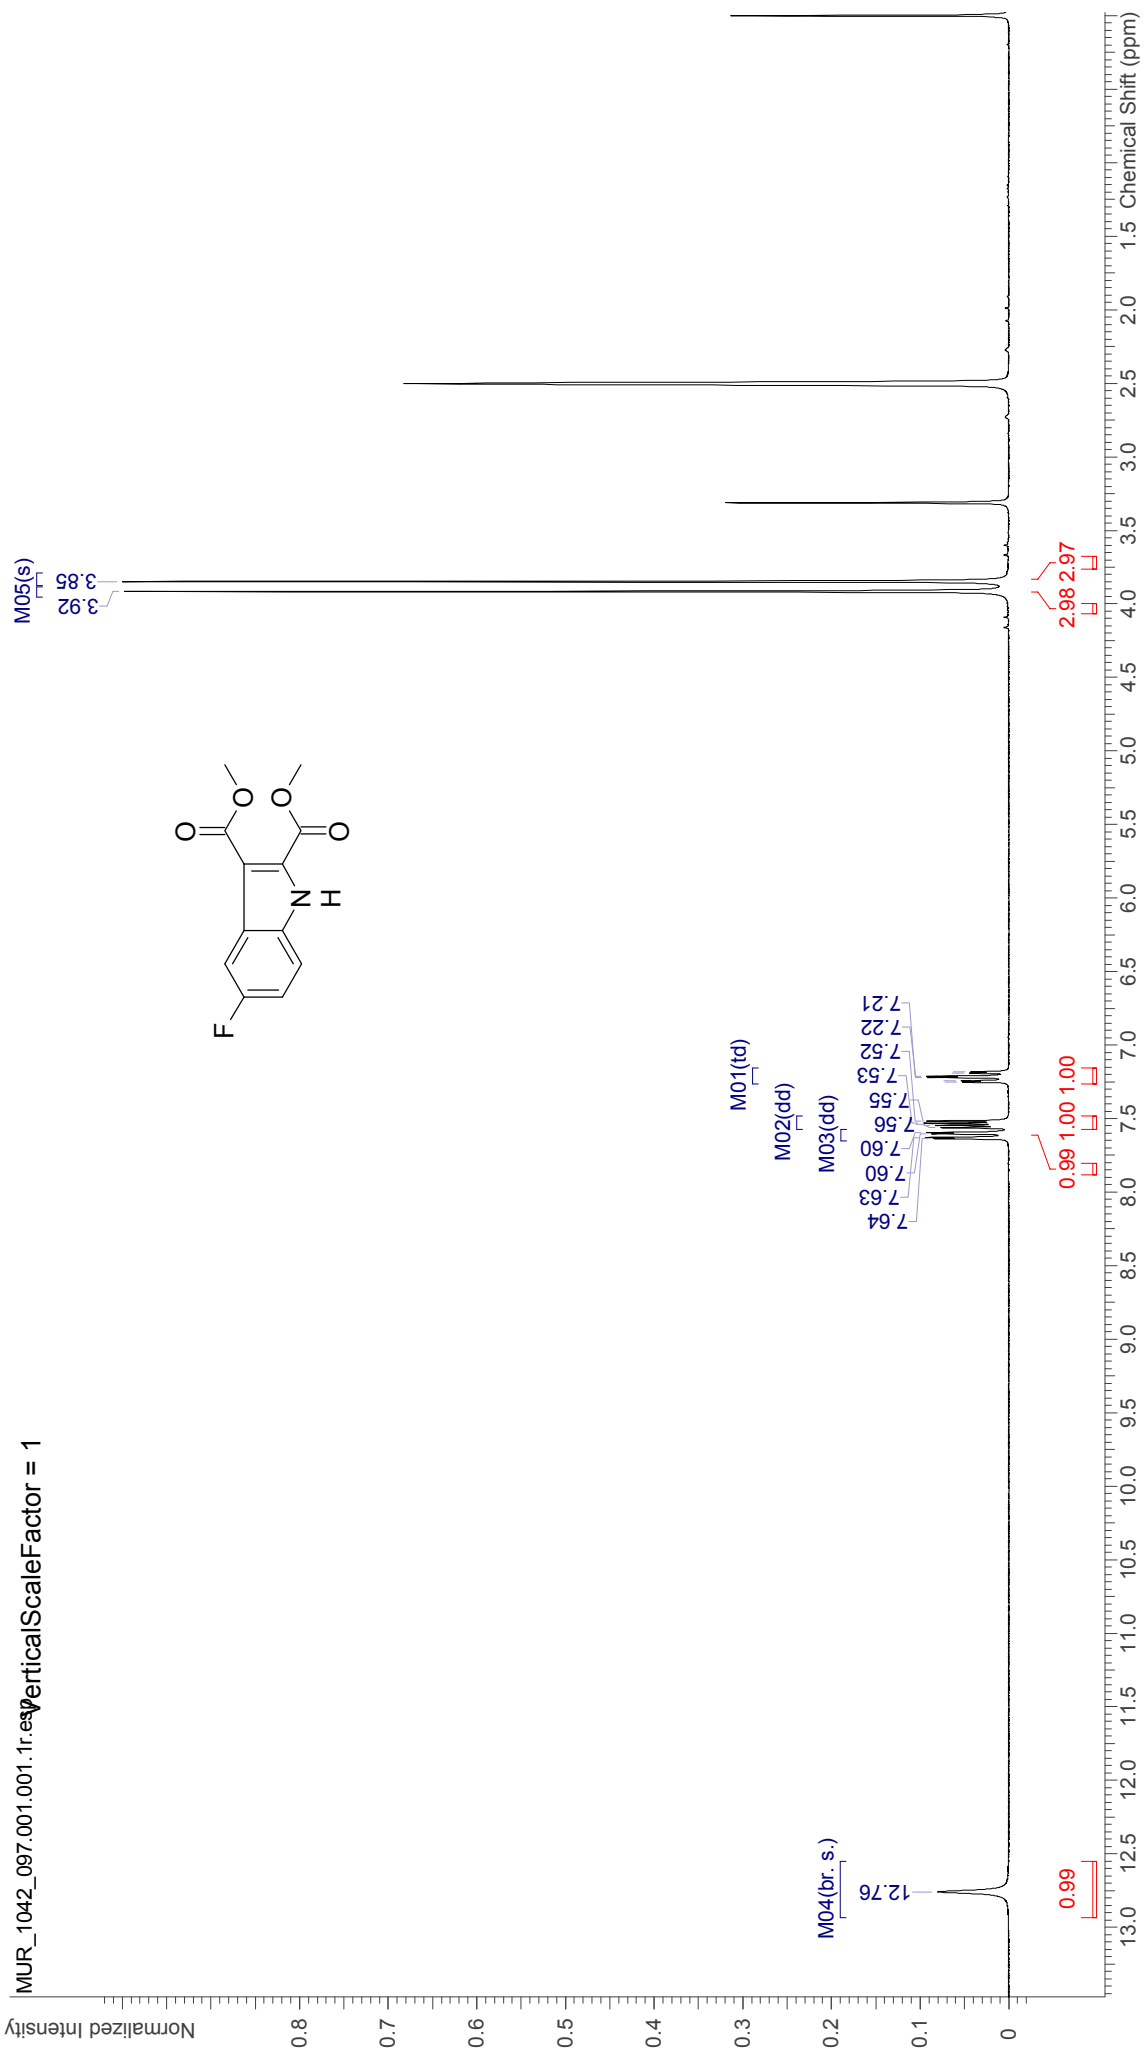

|                                    |                                                                |                                 |                                                          |                             |            |
|------------------------------------|----------------------------------------------------------------|---------------------------------|----------------------------------------------------------|-----------------------------|------------|
| <b>OriginalDateForRelativeTime</b> | 2014-04-03T14:00:40                                            | <b>Multiplets Integrals Sum</b> | 0.00                                                     | <b>Number of Nuclei</b>     | 0 C's      |
| <b>Acquisition Time (sec)</b>      | 1.0912                                                         | <b>Comment</b>                  | MUR_1042_097 C-13CPD DMSO (F:\ecm\DATA\2014-04} bionmr-1 |                             |            |
| <b>Date</b>                        | 03 Apr 2014 14:00:40                                           | <b>Date Stamp</b>               | 03 Apr 2014 14:00:40                                     |                             |            |
| <b>File Name</b>                   | C:\Users\kvjk299\Desktop\C1329032014\MUR_1042_097\1\pdata\1\1r |                                 |                                                          |                             |            |
| <b>Nucleus</b>                     | 13C                                                            | <b>Number of Transients</b>     | 3000                                                     | <b>Origin</b>               | spect      |
| <b>Owner</b>                       | administrator                                                  | <b>Points Count</b>             | 32768                                                    | <b>Pulse Sequence</b>       | zpgg30     |
| <b>SW(cyclical) (Hz)</b>           | 30030.03                                                       | <b>Solvent</b>                  | DMSO-d6                                                  | <b>Spectrum Offset (Hz)</b> | 12649.9248 |
| <b>Sweep Width (Hz)</b>            | 30029.11                                                       | <b>Temperature (degree C)</b>   | 25.000                                                   | <b>Spectrum Type</b>        | STANDARD   |

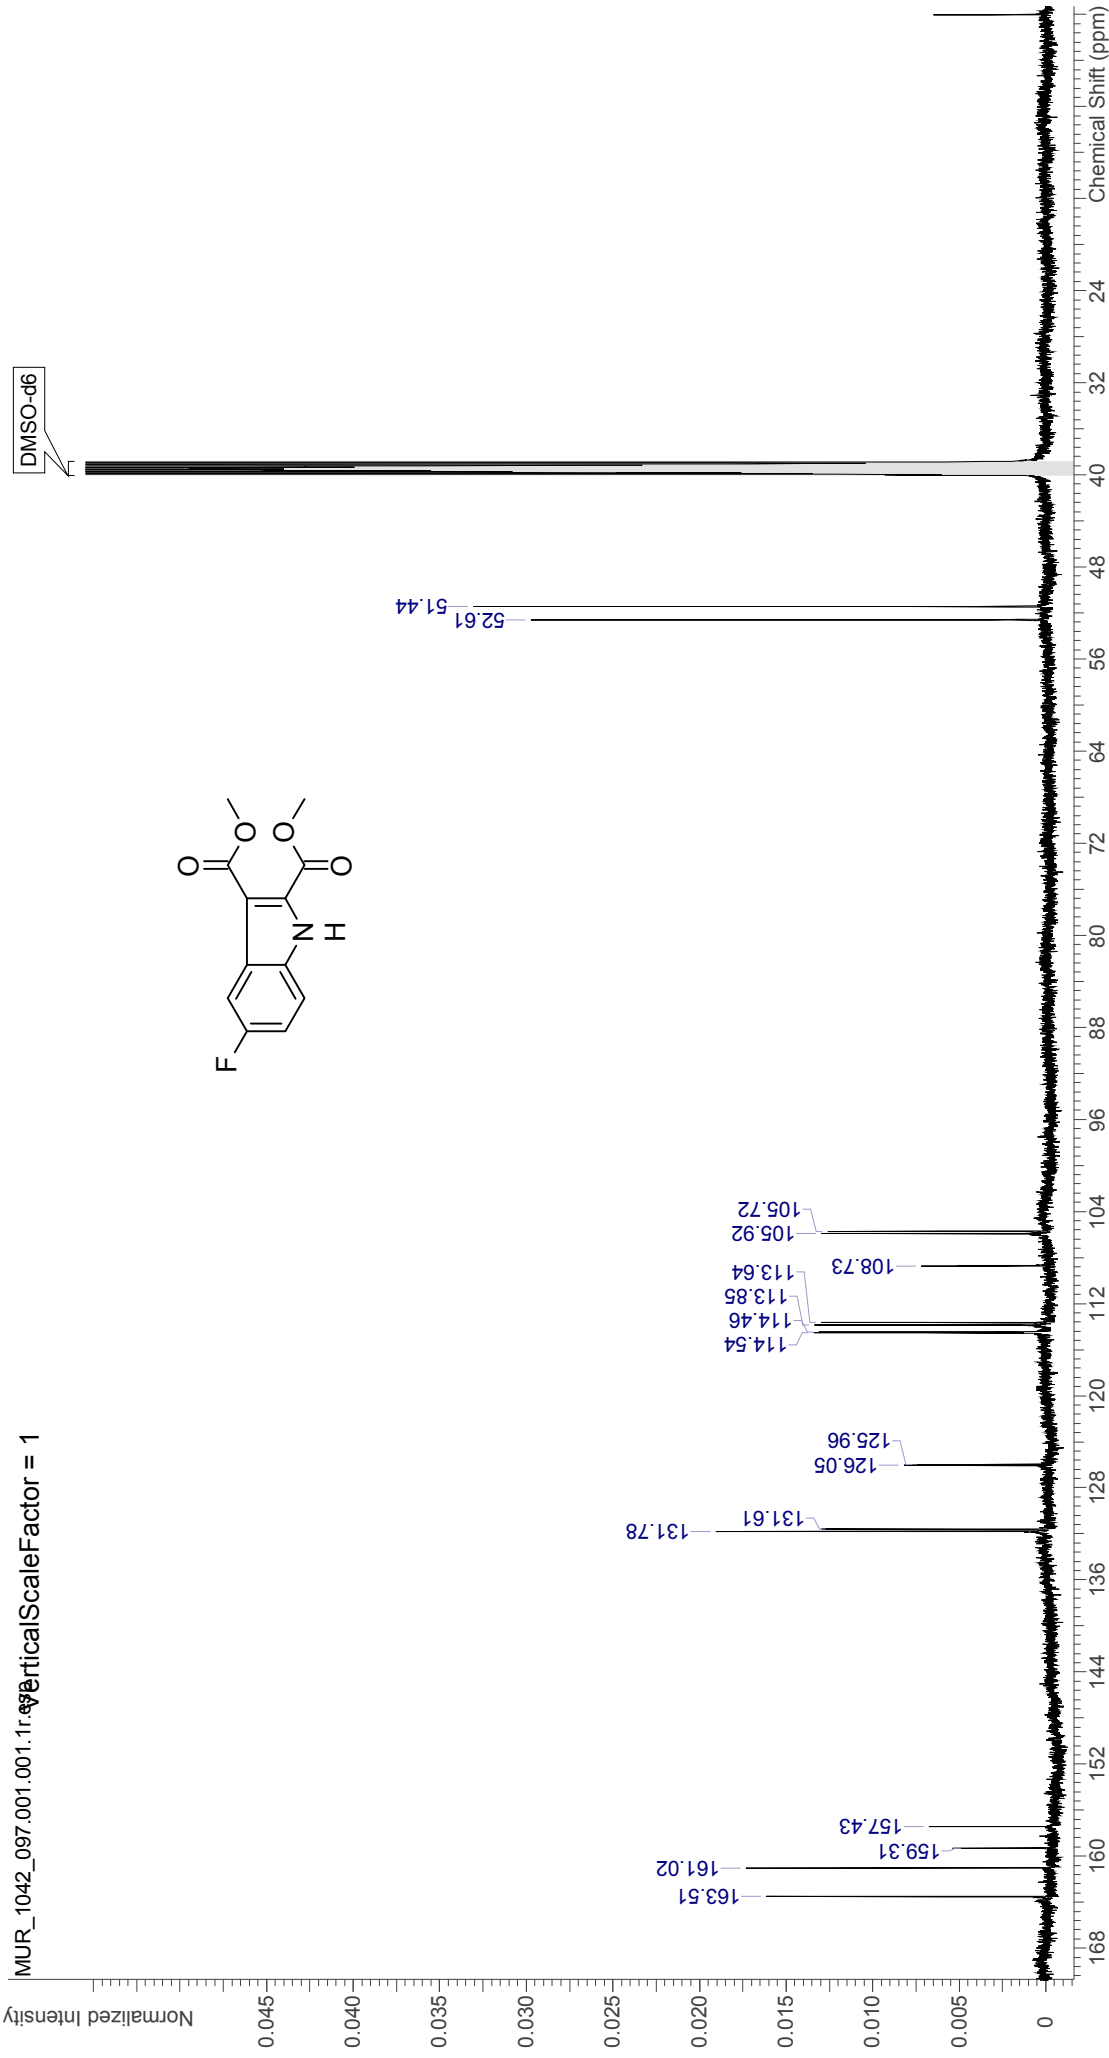



|                                                        |                                                                              |                                       |                                 |                                      |  |
|--------------------------------------------------------|------------------------------------------------------------------------------|---------------------------------------|---------------------------------|--------------------------------------|--|
| <b>OriginalDateForRelativeTime</b> 2014-04-04T17:27:36 |                                                                              | <b>Multiplets Integrals Sum</b> 13.15 |                                 | <b>Number of Nuclei</b> 13 H's       |  |
| <b>Acquisition Time (sec)</b> 5.3084                   | <b>Comment</b> MUR_098                                                       | <b>Date</b> 04 Apr 2014 17:27:36      |                                 |                                      |  |
| <b>Date Stamp</b> 04 Apr 2014 17:27:36                 | <b>File Name</b> \\inbglab176164\ecm_2014\MUR\data\med\mm\MUR_098\1\data\11r |                                       |                                 |                                      |  |
| <b>Frequency (MHz)</b> 300.13                          | <b>Nucleus</b> 1H                                                            | <b>Number of Transients</b> 32        | <b>Origin</b> av300             | <b>Original Points Count</b> 32768   |  |
| <b>Owner</b> administrator                             | <b>Points Count</b> 32768                                                    | <b>Pulse Sequence</b> zg30            | <b>Receiver Gain</b> 1625.50    | <b>SW(cyclical) (Hz)</b> 6172.84     |  |
| <b>Solvent</b> DMSO-d6                                 | <b>Spectrum Offset (Hz)</b> 1853.6366                                        | <b>Spectrum Type</b> STANDARD         | <b>Sweep Width (Hz)</b> 6172.65 | <b>Temperature (degree C)</b> 25.000 |  |

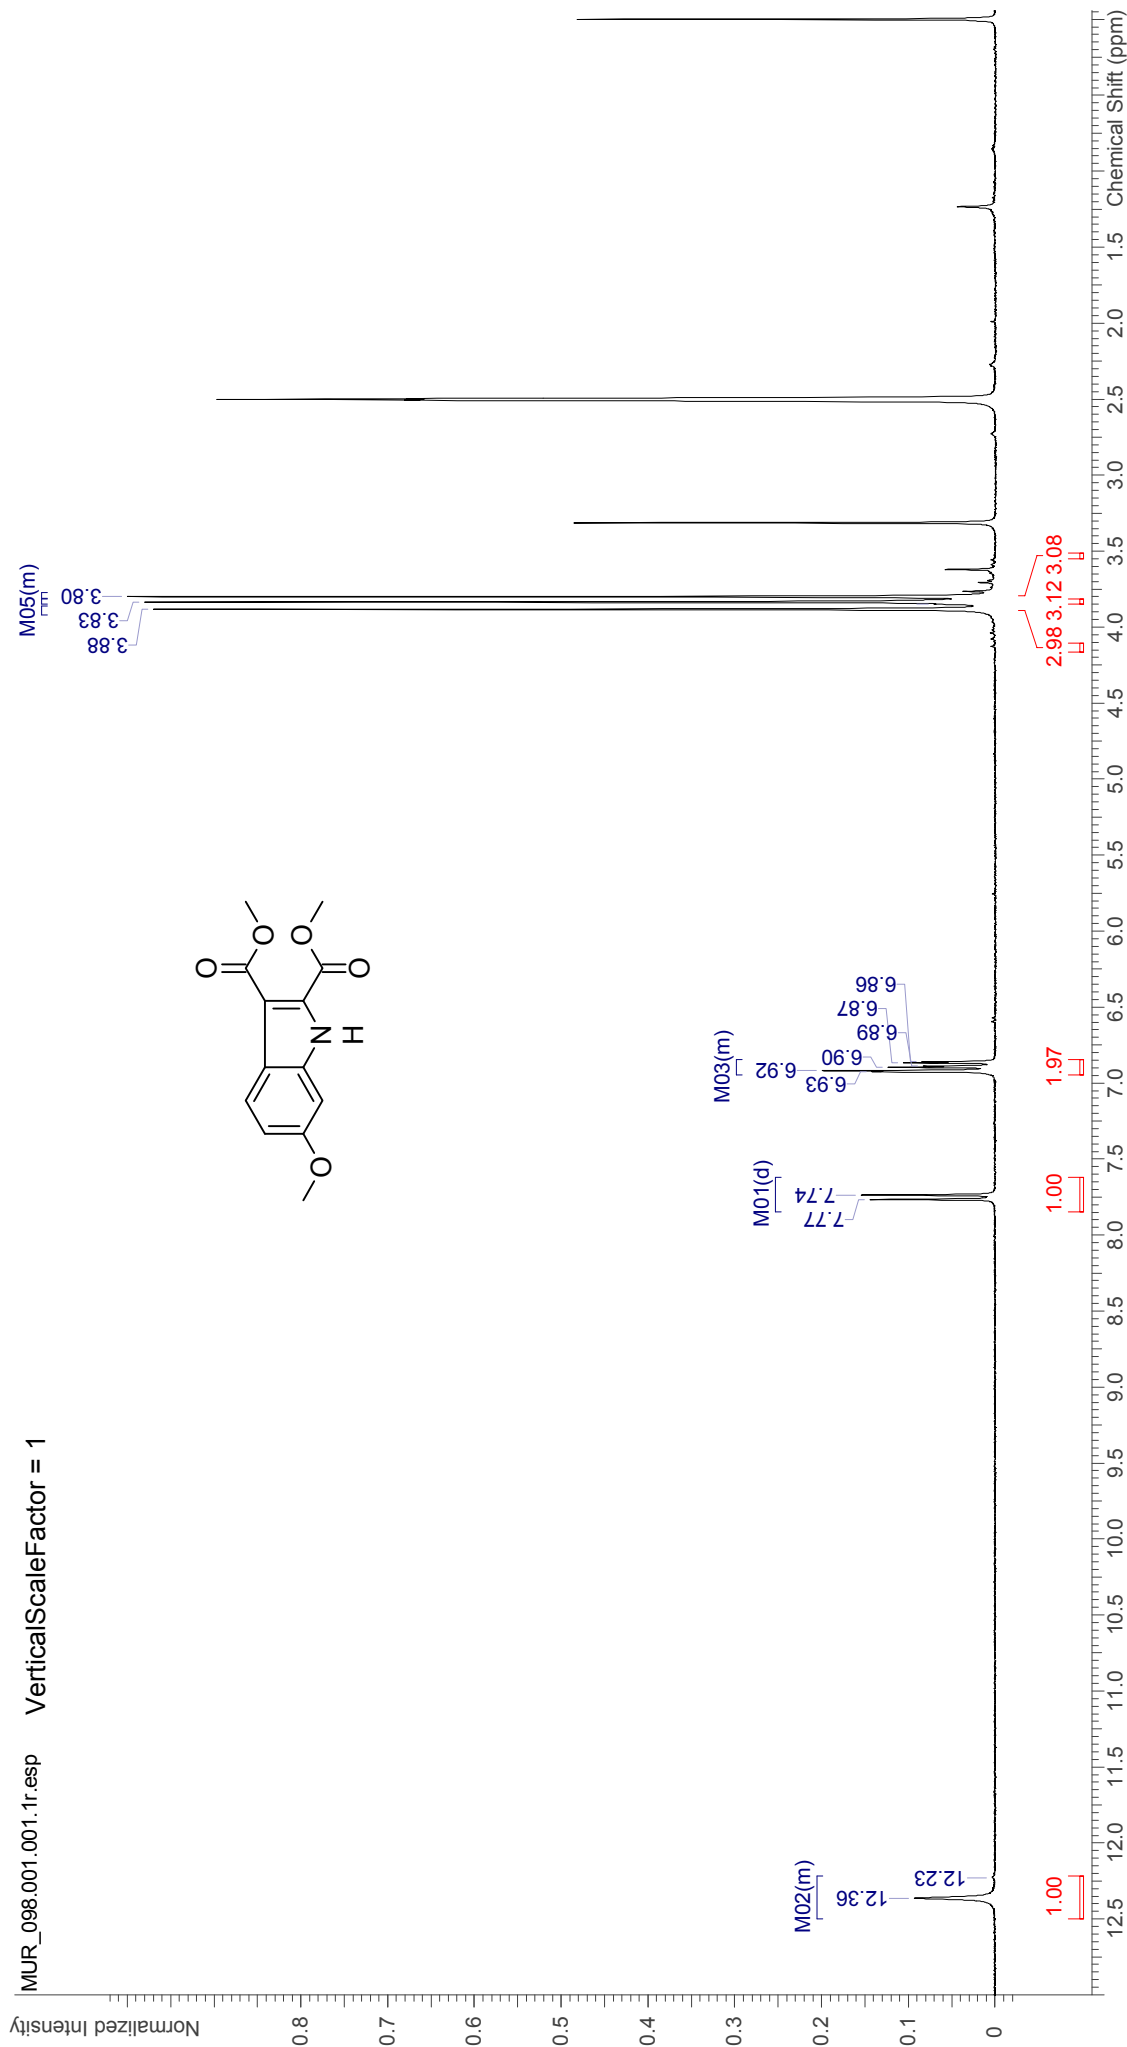

| OriginalDateForRelativeTime | 2014-04-04T19:33:28                                                               | Multiplets Integrals Sum | 0.00                                                       | Number of Nuclei      | 0 C's    |
|-----------------------------|-----------------------------------------------------------------------------------|--------------------------|------------------------------------------------------------|-----------------------|----------|
| Acquisition Time (sec)      | 1.0912                                                                            | Comment                  | MUR_1042_098C13 C13CPD DMSO (F:\ecm\DATA\2014-04} bionmr 4 |                       |          |
| Date                        | 04 Apr 2014 19:33:28                                                              | Date Stamp               | 04 Apr 2014 19:33:28                                       |                       |          |
| File Name                   | C:\Users\kvjk299\Desktop\C13ELN folder\MURUGAN-CARBON\mur_1042_098c13\1\data\1\1r | Origin                   | spect                                                      | Frequency (MHz)       | 125.77   |
| Nucleus                     | 13C                                                                               | Number of Transients     | 3368                                                       | Original Points Count | 32768    |
| Owner                       | administrator                                                                     | Points Count             | 32768                                                      | Receiver Gain         | 32768.00 |
| SW(cyclical) (Hz)           | 30030.03                                                                          | Solvent                  | DMSO-d6                                                    | Spectrum Type         | STANDARD |
| Sweep Width (Hz)            | 30029.11                                                                          | Temperature (degree C)   | 25.000                                                     |                       |          |

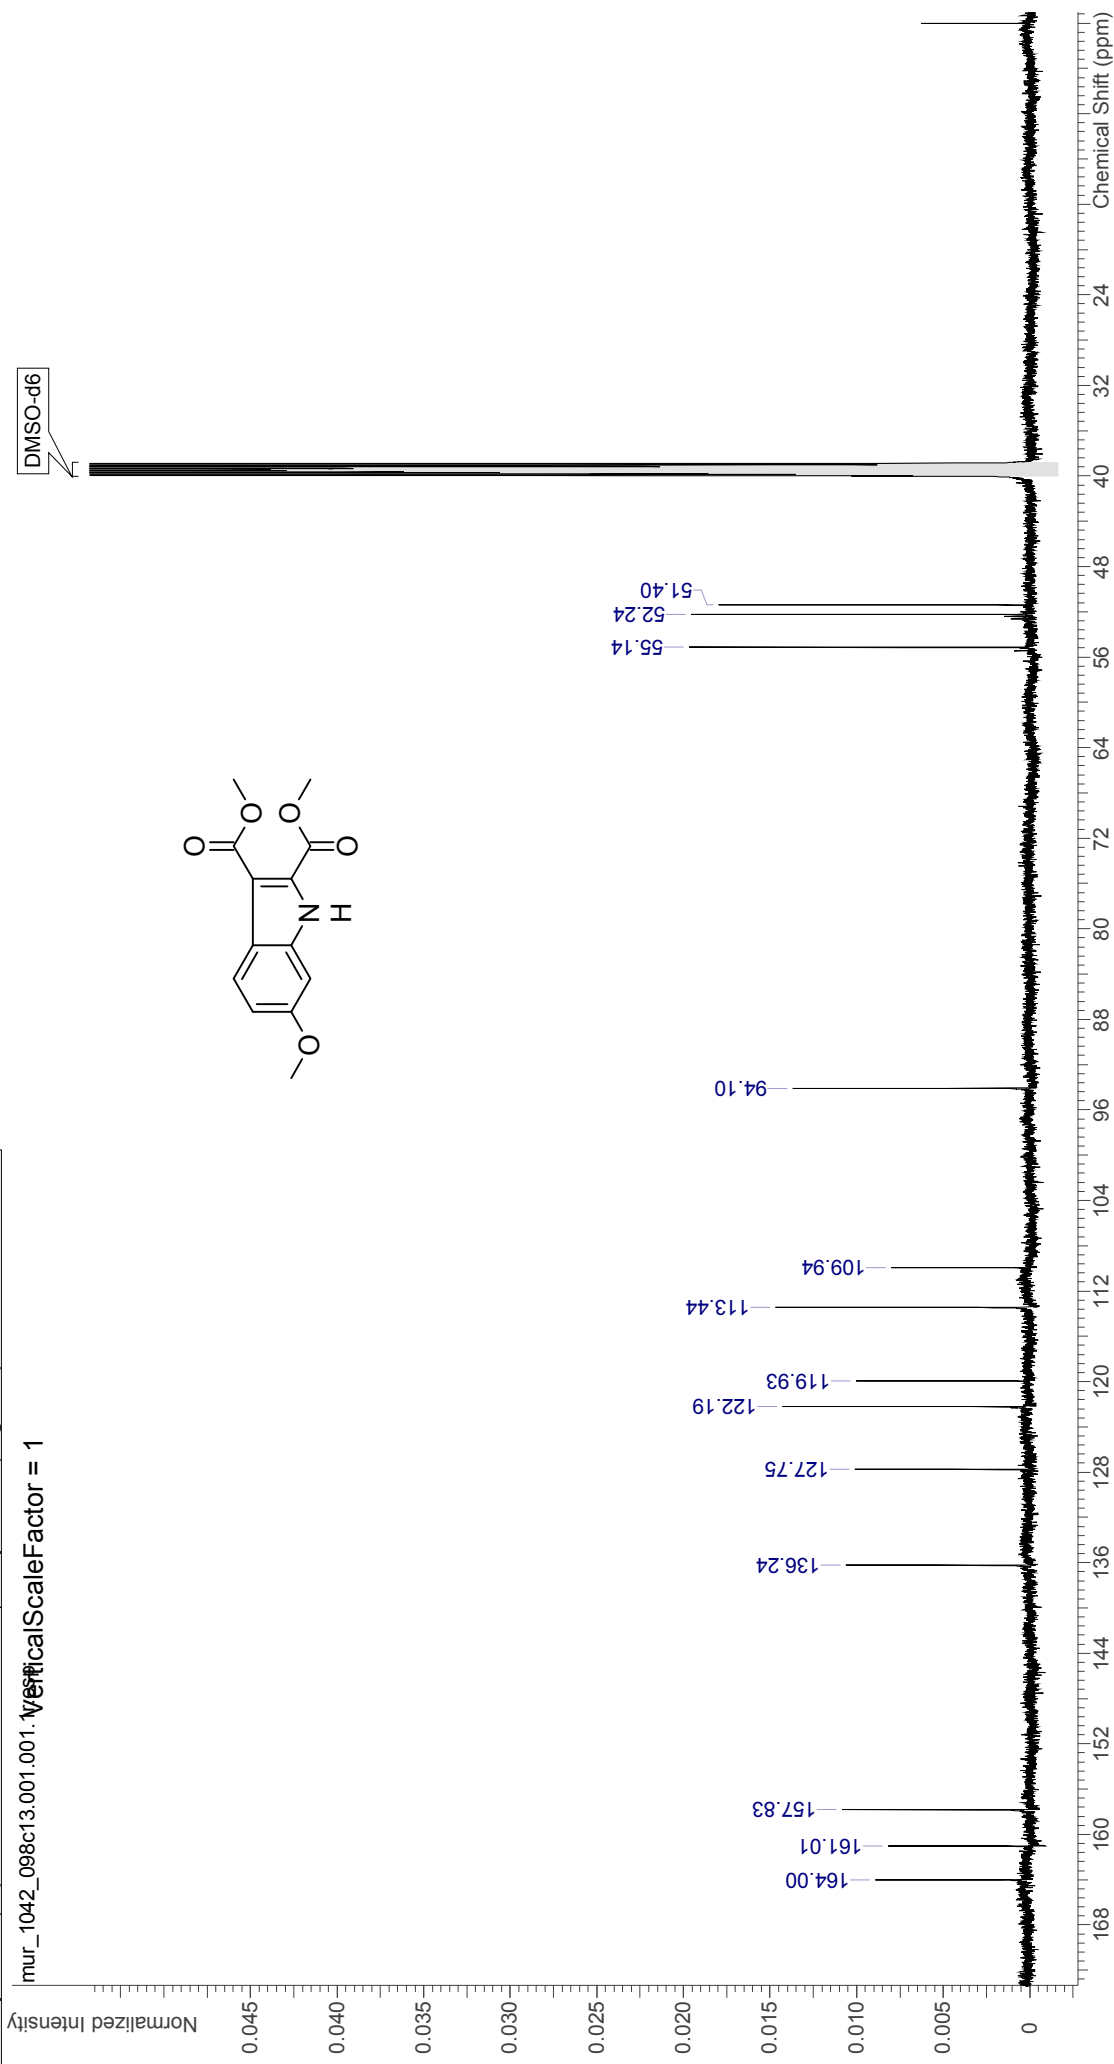

Supplement: c5ra05082k2.pdf [file c5ra05082k2.pdf]
